1 **TITLE:**

2 Pro-inflammatory macrophages impair skeletal muscle regeneration in ischemic-damaged limbs by  
3 inducing precocious differentiation of satellite cells

4  
5 **AUTHORS:**

6 Kevin W. Southerland<sup>1, \*, #</sup>, Yueyuan Xu<sup>2, 3, 4, \*</sup>, Derek T. Peters<sup>2, 3, 4, \*</sup>, Xiaolin Wei<sup>2, 3, 4</sup>, Xin Lin<sup>2, 3, 4</sup>,  
7 Yu Xiang<sup>2, 3, 4</sup>, Kaileen Fei<sup>1, 2, 5</sup>, Lindsey A. Olivere<sup>6</sup>, Jeremy M. Morowitz<sup>2, 7</sup>, James Otto<sup>1</sup>, Qunsheng  
8 Dai<sup>1</sup>, Christopher D. Kontos<sup>8</sup>, Yarui Diao<sup>2, 3, 4, 9, 10, #</sup>

9  
10 **AFFILIATION:**

11 1. Division of Vascular and Endovascular Surgery, Department of Surgery, Duke University Medical  
12 Center, Durham, NC 27710, USA

13 2. Department of Cell Biology, Duke University Medical Center, Durham, NC 27710, USA

14 3. Duke Regeneration Center, Duke University Medical Center, Durham, NC 27710, USA

15 4. Center for Advanced Genomic Technologies, Duke University, Durham, NC 27708, USA

16 5. Duke University School of Medicine, Duke University, Durham, NC 27710, USA

17 6. Division of Vascular Surgery, Department of Surgery, University of Pittsburgh Medical Center,  
18 Pittsburgh, PA 15217, USA

19 7. Development and Stem Cell Biology Program, Duke University, Durham, NC 27710, USA

20 8. Division of Cardiology, Department of Medicine, Duke University Medical Center, NC 27710, USA

21 9. Department of Orthopaedic Surgery, Duke University Medical Center, Durham, NC 27710, USA

22 10. Department of Pathology, Duke University Medical Center, Durham, NC 27710, USA

23

24 \* These authors contributed equally to this study.

25 # Co-corresponding authors

26

27 **ABSTRACT (150 words)**

28 Chronic limb-threatening ischemia (CLTI), representing the end-stage of peripheral arterial disease  
29 (PAD), is associated with a one-year limb amputation rate of ~15-20% and significant mortality. A key  
30 characteristic of CLTI is the failure of the innate regenerative capacity of skeletal muscle, though the  
31 underlying mechanisms remain unclear. Here, single-cell transcriptome analysis of ischemic and non-  
32 ischemic muscle from the same CLTI patients demonstrated that ischemic-damaged tissue is enriched  
33 with pro-inflammatory macrophages. Comparable results were also observed in a murine CLTI model.  
34 Importantly, integrated analyses of both human and murine data revealed premature differentiation of  
35 muscle satellite cells (MuSCs) in damaged tissue and indications of defects in intercellular signaling  
36 communication between MuSCs and their inflammatory niche. Collectively, our research provides the  
37 first single-cell transcriptome atlases of skeletal muscle from CLTI patients and murine models,  
38 emphasizing the crucial role of macrophages and inflammation in regulating muscle regeneration in  
39 CLTI through interactions with MuSCs.

40 **MAIN TEXT**

41

42 **INTRODUCTION:**

43 Atherosclerotic vascular diseases that cause tissue ischemia are the cause of pathological conditions  
44 such as myocardial infarction, stroke, and peripheral artery disease (PAD)<sup>1-5</sup>. In PAD, the most severe  
45 clinical manifestation is chronic limb threatening ischemia (CLTI), which is associated with a high  
46 incidence of permanent limb tissue loss<sup>6</sup>. Accordingly, about 15-20% of CLTI patients undergo limb  
47 amputation within one year of diagnosis, and 50% die within five years<sup>7</sup>. The current treatment options  
48 for CLTI patients focus primarily on improving limb perfusion but these strategies often fail to prevent  
49 disease progression or limb loss, pointing to a mechanism other than simply tissue perfusion as the  
50 sole etiology of tissue injury<sup>8</sup>. Accumulating evidence now points to the ability of the skeletal muscle to  
51 withstand ischemic injury or to regenerate in the setting of ischemia as important mediators of tissue  
52 loss in CLTI<sup>9-13</sup>. In support of this notion is the discrepancy between CLTI patients and those with  
53 intermittent claudication (IC), a mild form of PAD. (IC) presents as reproducible muscle pain with  
54 exertion that is relieved with rest<sup>14</sup>. Patients with IC have more favorable clinical outcomes than CLTI  
55 patients. In fact, the one year limb loss rate for IC is <1%<sup>15</sup>. Intriguingly, a subset of IC patients  
56 exhibits atherosclerosis that is comparable to those observed in CLTI but does not develop the  
57 permanent tissue loss phenotype characteristic of CLTI (**Fig S1A**)<sup>14,16</sup>. The distinct clinical outcomes of  
58 patients with IC versus CLTI suggest that the reparative capacity of skeletal muscle plays a key role in  
59 determining the difference in disease progression in the two groups. Indeed, CLTI limbs exhibit  
60 extensive fibrosis and fatty deposition in skeletal muscle and a distinct skeletal muscle  
61 mitochondriopathy that distinguishes it from IC, indicating a role for pathologic alteration in skeletal  
62 muscle regeneration in the development of CLTI<sup>17,18</sup>. Therefore, a thorough understanding of the  
63 cellular and molecular mechanisms underlying ischemia-induced muscle regeneration will likely shed  
64 light on the development of new regenerative medicine strategies for limb salvage in CLTI patients that  
65 are independent of limb perfusion.

66

67 In a pre-clinical murine model of CLTI, in which ligation of the femoral artery causes hind limb  
68 ischemia (HLI), the degree of tissue loss is highly strain-dependent <sup>19</sup>. Specifically, BALB/c mice  
69 develop an extensive and irreversible limb tissue loss phenotype while C57BL/6 (BL6) mice are  
70 resistant to tissue loss and can initiate a potent muscle regeneration program <sup>13</sup>. Thus, murine models  
71 of HLI provide a unique opportunity to study the mechanistic determinants of skeletal muscle  
72 regeneration in the context of ischemia. In mammals, successful skeletal muscle regeneration requires  
73 the orchestrated activation, proliferation, and differentiation of muscle satellite cells (MuSCs, also  
74 known as muscle stem cells) that are normally quiescent in the uninjured state <sup>20,21</sup>. The regenerative  
75 capacity of MuSCs is supported by various cell types that comprise the MuSC niche, including  
76 macrophages <sup>22-25</sup>. Upon muscle injury, pro-inflammatory macrophages are enriched at the site of  
77 tissue damage, followed by a polarization process in which they acquire an anti-inflammatory and pro-  
78 reparative state in later stages of tissue repair <sup>26,27</sup>. Inflammatory macrophages and their subsequent  
79 polarization to a regenerative phenotype play a critical role in numerous aspects of muscle repair and  
80 regeneration, including extracellular matrix (ECM) assembly, phagocytosis of tissue debris, and  
81 angiogenesis, in addition to supporting the proliferation and differentiation of MuSCs through the  
82 secretion of pro-regenerative factors <sup>22</sup>. Despite the well-established role of macrophages in skeletal  
83 muscle regeneration, whether and how macrophages regulate limb tissue repair in response to an  
84 ischemic insult in the context of CLTI remains to be elucidated.

85

86 Here, through single-cell transcriptomic analysis of skeletal muscle tissue from representative  
87 CLTI patients and murine models of HLI, we show that non-regenerative, ischemia-injured limbs are  
88 enriched with macrophages exhibiting a persistent pro-inflammatory signature. Significantly, these pro-  
89 inflammatory macrophages do not express the pro-regenerative cytokines that normally promote the  
90 proper balance in MuSCs of proliferation versus myogenic differentiation. Our findings support the idea  
91 that macrophages play a critical role in regulating limb regeneration in ischemia-induced tissue damage

92 and they provide the first single-cell transcriptome atlas of CLTI, both in humans and mice, as a  
93 valuable resource for future studies of CLTI pathobiology and potential regenerative therapeutics.

94

## 95 **RESULTS:**

### 96 **The ischemia-injured muscle in CLTI patients is enriched with pro-inflammatory macrophages.**

97 To understand the pathological changes in ischemia-injured skeletal muscle, we carried out  
98 single-cell RNA-seq analysis of fresh skeletal muscle samples from CLTI patients undergoing limb  
99 amputation surgery (**Fig 1A**). The biopsies were taken from both the distal (ischemic) and proximal  
100 (non-ischemic) regions of the amputated limb, disassociated into single cell suspensions and subjected  
101 to single-cell transcriptome analysis (**Fig 1A, Fig S1A**). Importantly, obtaining matched proximal and  
102 distal tissue from the same individual allowed us to examine the specific pathological changes caused  
103 by ischemia while controlling for differences in the genetic background and health conditions of each  
104 patient. Using pairs of matched proximal and distal muscle tissues from three representative CLTI  
105 patients, we recovered a total of 16,201 high-quality cells for downstream bioinformatics analysis. After  
106 correcting the batch effect and patient-specific biases (detailed in Materials and Methods), all the cells  
107 were distributed across the major cell clusters on the UMAP plot (**Fig S1B**). They were annotated into  
108 eight major cell types (**Fig 1B**), including fibro-adipogenic progenitor cells (FAPs), MuSCs, myoblasts,  
109 endothelial cells, macrophages, and neutrophils, based on the expression of well-defined cell type-  
110 specific marker genes (**Fig 1C, Fig S1C**).

111

112 Intriguingly, when macrophages were segregated into non-overlapping populations on a new  
113 UMAP space with increased resolution, significant differences were seen between cells derived from  
114 proximal versus distal tissue (**Fig 1D**). The macrophages were separated into nine sub-clusters (**Fig**  
115 **1E**). Of these, cluster 0 was comprised primarily of cells from non-ischemic-tissue, while clusters 1 and  
116 2 were predominantly composed of macrophages from ischemia-injured distal muscle (**Fig 1E**). We  
117 further identified genes differentially expressed in clusters 1 and 2 versus cluster 0 (Wilcoxon test, p-

118 value  $< 0.05$ ,  $\log_2$  fold change  $> 0.25$ , **Table S1**) and found that the genes highly expressed in clusters  
119 1 and 2 were enriched for Gene Ontology (GO) terms related to pro-inflammatory pathways (**Fig 1F**).  
120 Indeed, several well-characterized pro-inflammatory genes, such as TNF, IL1B, CCL3, and CCL4 <sup>28</sup>,  
121 were expressed at significantly higher levels in macrophages from ischemic versus those from non-  
122 ischemic muscle (**Fig 1G, 1H**). These results demonstrate that macrophages in the ischemia-injured  
123 limb muscle of CLTI patients display a pro-inflammatory phenotype.

124

125 To validate these findings, we collected distal and proximal skeletal muscle samples from  
126 another seven CLTI patients and immunostained tissue sections with antibodies against the pan-  
127 macrophage marker CD11b and the anti-inflammatory macrophage marker CD206 (**Fig S1D**).  
128 According to previously published criteria <sup>29,30</sup>, we designated the CD11b+/CD206+ cells as anti-  
129 inflammatory macrophages, and the CD11b+/CD206- cells as inflammatory macrophages. In the  
130 ischemia-injured distal muscle, we found average 1.97-fold more pro-inflammatory macrophages  
131 compared to the non-ischemic condition (**Fig 1I**, P value = 0.02, paired samples Wilcoxon test). In  
132 contrast, there were average 2.07-fold more anti-inflammatory macrophages in the non-ischemic  
133 proximal muscles (**Fig 1I**, P value = 0.02, paired samples Wilcoxon test). Considering all these results,  
134 we conclude that pro-inflammatory macrophages are enriched in the ischemia-damaged limb muscle of  
135 CLTI patients.

136

### 137 **Single-cell transcriptomic analysis of regenerative versus CLTI-like mouse limb muscle** 138 **following hind-limb ischemia surgery.**

139 Next, we sought to determine whether the temporal change of the inflammatory response of ischemic  
140 limb muscle is associated with the tissue loss phenotype observed in the CLTI patients. Since it is not  
141 feasible to obtain clinical samples from CLTI patients over time, we employed a murine model of CLTI  
142 in which hind-limb ischemia (HLI) surgery is used to ligate the femoral artery in BALB/c and C57BL/6  
143 mice to assess the temporal dynamics of tissue loss in CLTI (**Fig 2A, 2B**). As noted, following HLI,

144 BALB/c mice develop a CLTI-like, profound tissue loss phenotype and paw necrosis (**Fig 2B**)<sup>13,19,31</sup>. In  
145 contrast, C57BL/6 mice display very minor, if any, tissue loss (**Fig 2A, 2B**), despite experiencing a  
146 similar 80-90% reduction in limb blood flow after HLI (**Fig 2B**, left). Consistent with previous results<sup>13</sup>,  
147 the ischemic tibialis anterior (TA) muscle of C57BL/6 mice exhibited a potent regenerative response  
148 following HLI, indicated by 6.2-fold greater expression of embryonic myosin heavy chain (eMHC) and  
149 3.1-fold more Pax7+ satellite cells compared to BALB/c mice at 7 days post-injury (dpi) (**Fig 2C, 2D**).  
150 Therefore, BALB/c mice represent a murine model of CLTI with permanent tissue loss, whereas  
151 C57BL/6 mice are resistant to ischemia-induced muscle loss and display a potent skeletal muscle  
152 regenerative program following HLI.

153

154 To determine the temporal dynamics of inflammatory response upon limb ischemia injury, we  
155 conducted scRNA-seq analysis using cells prepared from three hindlimb muscles (TA, gastrocnemius,  
156 and the soleus) from both BALB/c and C57BL/6 mice before and after HLI at intervals from 1-7 dpi. We  
157 included two biological replicates for each experimental condition (**Fig 2E**). In total, we recovered  
158 84,362 high-quality single cells from the two mouse strains at four-times (**Fig 2F, S2A, S2B**). We  
159 identified 17 major cell types, including muscle progenitor cells, immune cells, and FAPs (**Fig 2F**).  
160 These annotated cell types express high levels of expected marker genes that were defined in previous  
161 studies of scRNA-seq analysis of mouse skeletal muscle regeneration (**Fig 2G, S2C**). Notably, these  
162 scRNA-seq datasets thus provide the first reference atlas to examine the temporal dynamics of cell  
163 populations and gene expression patterns in mouse strains that display either successful or failed  
164 skeletal muscle regeneration following limb ischemia.

165

166 **Pro-inflammatory macrophages are enriched in the ischemic-damaged limb muscle of mice**  
167 **subjected to HLI.**

168 We next explored whether differences exist in the macrophage populations in the ischemic hind  
169 limbs of C57BL/6 and BALB/c mice. Fine resolution sub-clustering analysis of a total of 26,991

170 macrophages revealed 12 sub-clusters (**Fig S3A**, clusters 0-11), which display temporal-, strain-  
171 specific-, and cluster specific gene expression patterns (**Fig 3A**, **Fig S3B**, **Table S2**). Notably, clusters  
172 4 and 5 were dominated by BALB/c cells, while clusters 1, 2, 3, 7, 8, and 9 were made up primarily of  
173 C57BL/6 macrophages (**Fig 3A**, right). At 3 dpi, the macrophages from BALB/c and C57BL/6 were  
174 segregated into two non-overlapping populations on the UMAP (**Fig 3A**, right, day 3), indicating  
175 drastically different gene expression programs of macrophages at day 3 between the two strains.  
176 Significantly, the BALB/c specific cluster 5 displayed a strong pro-inflammatory gene expression  
177 signature, indicated by a high “inflammatory response score” computed by the expression level of a list  
178 of genes included in the GO term of the inflammatory response (**Fig 3B**, detailed in material and  
179 methods). Macrophages can be classified largely into the pro-inflammatory M1 and anti-  
180 inflammatory/pro-regenerative M2 states based on their in vitro signatures in response to inflammation  
181 <sup>32</sup>. Using this convention, we found that the anti-inflammatory M2 gene sets were highly expressed in  
182 the C57BL/6 macrophages, while the pro-inflammatory M1 gene sets were highly expressed in  
183 macrophages from BALB/c mice (**Fig 3C**). Indeed, the well-characterized anti- and pro-inflammatory  
184 genes were highly expressed in the 3dpi macrophages of C57BL/6 and BALB/c, respectively (**Fig 3D**).  
185 These results suggest that following HLI, the non-regenerative BALB/c limb muscles are enriched with  
186 macrophages exhibiting a pro-inflammatory phenotype compared to those in C57BL/6 muscle.

187

188 To further validate the findings from scRNA-seq, we purified CD11b<sup>+</sup>/F480<sup>+</sup> macrophages by  
189 FACS from the hindlimb muscle of C57BL/6 and BALB/c mice at 3-days post HLI for bulk RNA-seq  
190 analysis (**Fig S3C**). We identified 289 down-regulated and 320 up-regulated genes in C57BL/6 versus  
191 BALB/c macrophages (**Fig 3E**, **Table S3**, DEseq2, fold change 2, FDR 0.05). Many pro-inflammatory  
192 genes, such as *Arg1*, *Cxcl3*, and *Cxcl1* <sup>27</sup>, were highly expressed in the BALB/c macrophages (**Fig 3E**,  
193 **3F**). In contrast, anti-inflammatory and pro-regenerative genes, such as *Chil3*, *Igf1*, *Gdf15*, and *Gdf3*  
194 <sup>33,34</sup>, were highly expressed in C57BL/6 3dpi macrophages (**Fig 3E**, **3F**, **S3D**). The genes highly  
195 expressed in 3dpi BALB/c macrophages were enriched for GO terms associated with inflammatory



196 response, chemotaxis, and immune response (**Fig 3G**). Collectively, these results highlight the clear  
197 transcriptional differences in macrophages present in the regenerative (C57BL/6) and non-regenerative  
198 (BALB/c) limbs following HLI. Furthermore, these findings demonstrate that BALB/c macrophages  
199 display a strong pro-inflammatory transcriptional signature associated with permanent limb tissue loss  
200 phenotype.

201

202 **MuSCs in the ischemia-injured limbs of BALB/c mice undergo precocious myogenic**  
203 **differentiation.**

204 MuSCs directly contribute to muscle regeneration through their activation, proliferation,  
205 differentiation, and fusion processes from the initial quiescent state<sup>35</sup>. To delineate strain-specific  
206 differences in MuSCs responses following HLI, we performed an in-depth analysis of all the scRNA-seq  
207 data on *Pax7*<sup>+</sup> MuSCs and *Myod*<sup>+</sup> MuSC-derived muscle precursor cells (MPCs). First, the  
208 MuSCs/MPCs were classified into quiescent (*Pax7* high), activated/proliferating (*MyoD*, *Ki67* high), and  
209 early (*MyoG* +) and late (*Ckm*<sup>+</sup>) differentiating states (**Fig 4A, S4A**). Next, we conducted pseudotime  
210 trajectory analysis to rank all the MuSCs/MPCs based on their transcriptome similarities (**Fig S4B**).  
211 This approach showed that the MuSCs/MPCs ranked at early pseudotimes expressed a high level of  
212 quiescence marker genes (*Hes1*, *Calcr*, *Cd34*, *Pax7*, *Myf5*, and *Notch1/3*), while the cells at later times,  
213 defined as those in activation/proliferation (covered by blue bar on the left) and differentiation (covered  
214 by red bar on the left) states, expressed high levels of the activation marker *MyoD*, cell cycle-related  
215 genes (*Cdnb1/2*, *Cdc20*, *Cdk1*), and myogenic differentiation markers (*MyoG*, *Ckm*, and *Myh1*) (**Fig**  
216 **4B**). Significantly, along the pseudotime trajectory, we noted that MuSCs from both BALB/c and C57B/6  
217 mice can undergo activation/proliferation (**Fig 4C**, blue) and differentiation (**Fig 4C**, pink) from the initial  
218 quiescent state (**Fig 4C**, yellow), demonstrating that BALB/c mice do not lack intrinsic MuSC  
219 regenerative capacity.

220

221 It is well established that the proliferation phase of MuSCs/MPCs is critical for efficient muscle  
222 regeneration by producing sufficient MPCs for myogenic differentiation and fusion, and that the timing  
223 of the transition between proliferation and differentiation is important<sup>36</sup>. We found that before HLI (day  
224 0) and at 7dpi, the MuSCs/MPCs collected from the two mouse strains were well-aligned on the  
225 pseudotime trajectory, and clustered close in both the early (quiescent) and late (differentiation) stages  
226 of pseudotime (**Fig 4D**, sham and day 7). In contrast, the MuSCs/MPCs exhibited drastic strain-specific  
227 differences at 1dpi and 3dpi. At both of these times, a large fraction of C57BL/6 MuSCs/MPCs were in  
228 the activation/proliferation phase (**Fig 4D**, days 1 and 3, blue curve), whereas the vast majority of the  
229 BALB/c MuSCs/MPCs occupied the late, differentiation stage of the pseudotime trajectory. This pattern  
230 of MuSC/MPC distribution along the pseudotime trajectory suggests that the BALB/c MPCs committed  
231 to differentiation prematurely. This conclusion is also supported by immunohistochemical analysis,  
232 which revealed that at 7dpi BALB/c TA muscle contained terminally differentiated eMHC+ new  
233 myofibers, while the numbers of new muscle fibers and Pax7+ MuSCs were much less compared to  
234 C57BL/6 muscle (**Fig 2C, 2D**). Taken together, these results suggest that the failure of skeletal muscle  
235 regeneration in the BALB/c model of CLTI is at least partially due to the premature differentiation of  
236 MuSCs/MPCs.

237

238 **The pro-inflammatory niche induces premature differentiation of MuSCs in BALB/c mice**  
239 **following HLI.**

240 To address whether the inflammatory macrophages in BALB/c muscle are associated with  
241 premature differentiation of MuSCs following HLI, we first used RNAscope to assess the spatial  
242 distribution of F4/80+ (macrophage marker) and *Myod1*+ (MuSC/MPC marker) cells in TA muscle at  
243 3dpi of HLI. This approach demonstrated the proximity of macrophages to MuSCs in both C57BL/6 and  
244 BALB/c mice in the ischemic limb (**Fig 4E**). Next, we assessed the probability of intercellular  
245 communication between macrophages and MuSCs using a computational method called CellphoneDB  
246<sup>37</sup>. We found that at 3dpi, C57BL/6 MuSCs are likely responsive to well-characterized pro-regenerative

247 cytokines secreted by macrophages, including TGFB1 and IGF1 (**Fig 4F**), which are known to play  
248 critical roles in regulating skeletal muscle regeneration by promoting MPC proliferation and preventing  
249 MPC differentiation both in vitro and in vivo <sup>33,38,39</sup>. In contrast, a role for TGFB1 and IGF1 in  
250 macrophage-MuSC intercellular communication was not detected in BALB/c mice. Moreover, the  
251 genes highly expressed in C57BL/6 MuSCs at 3dpi, including *Igf1r* (**Fig S4C**), were significantly  
252 enriched for GO terms associated with skeletal muscle cell proliferation (**Fig 4G**). These results suggest  
253 that the aberrant inflammatory state of macrophages disrupts the pro-regenerative signaling  
254 communication between macrophages and MuSCs, such as IGF1, which is essential for MuSC  
255 expansion and the prevention of premature differentiation. Dysregulation of macrophage-MuSC  
256 signaling contributes to the premature differentiation phenotype observed in MuSCs of BALB/c mice.

257

258 Finally, to determine the causal role of macrophage-secreted ligands in regulating MuSC/MPC  
259 proliferation and differentiation, we purified primary MuSCs from both mouse strains for in vitro cell  
260 proliferation assays using BrdU incorporation. Upon treatment with recombinant IGF1, new DNA  
261 synthesis in MuSCs/MPCs isolated from both mouse strains significantly increased by 2-3 fold (**Fig 4H**).  
262 Proliferation and differentiation of MuSCs/MPCs exhibit a remarkable inverse relationship, as the  
263 myogenic differentiation program necessitates cell-cycle exit and inhibition of proliferative machinery.  
264 Consequently, we reasoned that in BALB/c muscle, the lack of expression of pro-regenerative  
265 cytokines, such as IGF1, from inflamed macrophages at least partially contributes to the premature  
266 differentiation of MuSCs/MPCs and failure of limb muscle regeneration in response to ischemia.

267

268 **Disruption of MuSCs fate switch is associated with aberrant macrophage-MuSC signaling**  
269 **crosstalk in human CLTI.**

270 Finally, we sought to translate our findings from murine models of CLTI to CLTI patients.  
271 Because of the inverse relationship between proliferation and differentiation, we reasoned that if  
272 premature differentiation of MuSCs also occurs in human CLTI, it would lead to reduced MuSC/MPC

273 numbers in ischemia-injured distal limbs. Consistent with this possibility, we found that the distal  
274 muscle of two out of three CLTI patient samples analyzed by scRNA-seq contained ~60% fewer  
275 MuSCs/MPCs compared to matched proximal muscle (**Fig S5A**). To further explore these findings, we  
276 conducted Pax7 immunostaining on cross-sections of limb muscles collected from another seven CLTI  
277 patients (**Fig S5B**, representative images from one patient). In four out of the seven patients, the  
278 numbers of Pax7+ MuSCs in the ischemia-injured distal muscle were ~10-60% less than those in the  
279 patient matched non-ischemic proximal muscle (**Fig S5B, S5C**). These results indicate that in at least  
280 a subset of CLTI patients, approximately 57% - 67%, ischemia-injured limb muscles contain fewer  
281 MuSCs/MPCs compared to non-ischemic muscle.

282

283 To assess changes in gene expression and signaling activity of MuSCs/MPCs in human CLTI,  
284 we performed an integrative analysis of our human CLTI scRNA-seq data in conjunction with published  
285 human muscle scRNA-seq data generated from 10 healthy individuals<sup>40</sup> (**Fig 5A, S5D**). This analysis  
286 revealed Pax7+ MuSCs, MyoG+ MPCs populations in human muscle, and the C3AR1+ macrophage  
287 population (**Fig 5B, S5E - S5G**). Notably, we inferred intercellular communications<sup>41</sup> using scRNA-seq  
288 data and discovered that both the number and strength of signaling pathways between MuSCs/MPCs  
289 and macrophages were substantially stronger in the distal, ischemic muscle than in the proximal, non-  
290 ischemic human muscle (**Fig 5C**). The top-ranked inter-cellular signaling flow from macrophages to  
291 MuSCs/MPCs in the distal tissue included well-established pro-inflammatory pathways, such as SPP1,  
292 CCL, TNF, and CXCL (**Fig 5D**), highlighting the aberrant signaling communication between  
293 inflammatory macrophages and MuSCs/MPCs/myoblasts in ischemia-injured human CLTI limb muscle.  
294 Moreover, we separated quiescent MuSCs that were Pax7 high (**Fig 5E, 5F, S5F** clusters 0 and 1) from  
295 MPCs committed to myogenic differentiation and expressing MYOG/MYH2 mRNA (**Fig 5E, 5F, S5F**  
296 clusters 2 and 4) on a new UMAP space. Significant pro-inflammatory signaling between macrophages  
297 and MuSCs/MPCs, such as IL6-IL6R, CCL4-SLC7A1, and SPP1-CD44/PTGER4, was detected only in  
298 the ischemic distal tissue and not in the non-ischemic proximal tissue (**Fig 5G**). Notably, distal

299 MuSCs/MPCs expressed significantly lower levels of the MuSC quiescence/self-renewal marker  
300 SPRY1 and higher levels of the differentiation marker MYOG compared to the proximal tissue of CLTI  
301 patients and healthy individuals (**Fig 5H**). These findings collectively demonstrate that the permanent  
302 tissue loss phenotype of human CLTI is associated with increased pro-inflammatory signaling between  
303 inflammatory macrophages and MuSCs and MuSC-derived myogenic cells. Importantly, the ischemia-  
304 damaged MuSCs and myoblasts exhibit gene expression signatures indicating a loss of quiescence  
305 (lower SPRY1) and premature differentiation (higher MYOG) compared to the non-ischemic tissue of  
306 CLTI patients and healthy muscle.

307

## 308 **DISCUSSION:**

309 In this study, we utilized a rigorous experimental approach with the acquisition of ischemic and  
310 non-ischemic macrophages from the same patient for our analysis. This approach limits the influence of  
311 confounding variables, such as diabetes, smoking and age, which are ubiquitous in human studies.  
312 Through analyses of human CLTI scRNA-seq datasets, our work provides evidence suggesting that the  
313 pro-inflammatory macrophages are associated with and at least partially contribute to the permanent  
314 tissue loss phenotype in CLTI. Moreover, these findings are further validated in the murine models of  
315 CLTI. A recent histologic assessment of macrophages and MuSCs obtained from gastrocnemius  
316 muscle biopsies in human patients demonstrated that anti-inflammatory (CD206+) macrophages were  
317 associated with increased MuSC content and muscle fiber size <sup>30</sup>. Taking all these results into  
318 consideration, our findings suggest a critical role of macrophage and inflammation in determining CLTI  
319 progression.

320

321 Furthermore, our findings here indicate that the macrophages in the ischemic damaged tissue  
322 create an inflamed niche that disrupts muscle regeneration by inducing precocious differentiation of  
323 MuSCs. Identifying the paracrine factors produced by the macrophages that mediate this effect may  
324 therefore throw light on potential therapeutic interventions. We have presented evidence for IGF1

325 signaling pathways which are required for muscle regeneration but lost in the ischemic damaged limbs.  
326 Moreover, our analysis revealed additional pathways that are differentially activated between  
327 macrophages and MuSCs in the BALB/c and C57BL/6 strains. For example, we find that SPP1-CD44  
328 signaling is highly active in macrophage-MuSC ligand-receptor pairs in both a murine CLTI model  
329 (BALB/c) and human CLTI patients. SPP1 is a pro-inflammatory cytokine that inhibits MuSC  
330 proliferation<sup>42</sup>. Hence, SPP1 signaling represents a potential mechanism to support our findings that  
331 the ischemic damaged MuSCs proceed to premature myogenic. In the future study, functional and  
332 mechanistic investigation of these pathways in both engineered human muscle bundles<sup>43</sup> and the  
333 murine models of CLTI may shed light to develop therapeutic strategies to manipulate MuSCs and  
334 improve tissue repair.

335

336 In summary, our work represents a significant advancement in our collective understanding of  
337 macrophage in the ischemic human limb at the cellular, transcriptomic, and signaling levels. Our  
338 findings point to new cellular mechanisms that can be potentially exploited to improve muscle function  
339 and lay a foundation for future muscle-specific therapies for limb salvage.

340

#### 341 **Accession Codes and Data Availability:**

342 Sequencing data has been deposited in the NCBI Gene Expression Omnibus (GEO)  
343 (<http://www.ncbi.nlm.nih.gov/geo>) under accession number GSE227077. The embargo will be lifted  
344 upon manuscript acceptance for publication. Additional materials, data, code, and related protocols are  
345 available upon request.

346

#### 347 **Author contributions:**

348 K.W.S., Y.Xu, D.T.P. and Y.D. designed the study. Y.Xu led bioinformatics data analysis with input from  
349 Y.Xiang. D.T.P. generated the experimental data with help from X.W., X.L., K.F., L.A.O., J.M.M., J.O.,

350 Q.D., K.W.S., C.D.K. and Y.D. supervised the study. K.W.S., Y.Xu., D.T.P., K.F. and Y.D. wrote the  
351 paper.

352

### 353 **Acknowledgments:**

354 We thank Drs. Brigid Hogan (Duke) for feedback on previous versions of the manuscript. This work is  
355 supported by a new lab startup fund from Duke University Regeneration Next Initiative (current Duke  
356 Regeneration Center) (to Y.D.), Duke Whitehead Scholarship (to Y.D.), Glenn Foundation for Medical  
357 Research and AFAR Grants for Junior Faculty (to Y.D.), NIH 4D Nucleome Consortium U01HL156064  
358 (to Y.D.), and NIH Genomic Innovator Awards R35HG011328 (to Y.D.). Duke University Medical Center  
359 Physician-Scientist Strong Start Award (to K.W.S.). Y. Xiang is supported by a Duke Regeneration  
360 Center postdoctoral fellowship. Y. Xu is supported by the Center for Advanced Genomic Technologies  
361 postdoctoral fellowship and the Duke Regeneration Center Fellowship to Accelerate Career  
362 Independence.

363

### 364 **MATERIALS AND METHODS:**

365

366 **PCR primers and oligo nucleotides used in this study are listed in Table S4.**

367

#### 368 **Human tissue collection and single-cell isolation**

369 Skeletal muscle was obtained from CLTI patients ( $n = 3$ ) undergoing lower-limb amputation in  
370 accordance with a research protocol approved by the Duke University Institutional Review Board  
371 (IRB#Pro00065709). Paired samples from proximal and distal muscle bodies were collected and  
372 subject to mechanical dissociation. A subsequent enzymatic digestion was performed using either  
373 0.05% pronase (Sigma, 537088) for 1 hour (Patient #1) or 3.7mg/mL collagenase II (Worthington,  
374 LS004177) for 90 minutes followed by 6mg/mL dispase (Gibco, 17105-041) for 30 minutes (Patients #2  
375 and #3). Cells were passed through a 100uM Steriflip vacuum filter (EMD Millipore, SCNY00100) and

376 resuspended in Ham's F-10 media supplemented with 10% horse serum and 1x penicillin/streptomycin.  
377 The single cell suspensions were stained with Propidium Iodide (PI). Fluorescence-activated cell  
378 sorting (FACS) was performed using a SonySorter SH800S to isolate PI- live cells. For human  
379 samples, approximately 150,000 PI- live cells were sorted per sample and 16,000-24,000 cells used for  
380 scRNA-seq library generation.

381

### 382 **Mouse hind limb ischemic injury and single-cell isolation**

383 Hind limb ischemia (HLI) surgery was performed on C57BL/6 and BALBc mice. To induce muscle  
384 ischemia, the femoral artery was ligated proximally, inferior to the inguinal ligament just proximal to the  
385 lateral circumflex femoral artery, as well as distally, immediately proximal to the bifurcation of the  
386 popliteal and saphenous arteries <sup>44</sup>. Laser Doppler Perfusion Imaging (LDPI) was performed with a  
387 Moor Instruments LDI2-High Resolution (830nM) System (Moor, Axminster, UK) to quantify and assess  
388 blood flow restoration.

389

### 390 **Mouse tissue collection and single-cell isolation**

391 Mouse hindlimb muscles were collected on days 0 (no injury), 1, 3, and 7 following HLI surgery and  
392 single-cell suspensions were generated using mechanical dissociation followed by enzymatic digestion  
393 with 0.05% Pronase (Sigma, 537088) for one hour. Cells were vacuum filtered as described above and  
394 subsequently stained with PI, anti-CD45-Alexa Fluor 488 (clone HI30, Invitrogen, MHCD4520), and  
395 FITC anti-CD31 (BioLegend, 102506). Using FACS, 150,000 PI- cells and an additional 150,000 PI-  
396 /CD31-/CD45- cells were isolated. The latter population ("depleted" cells) was isolated to increase the  
397 representation of non-hematopoietic and non-endothelial cells, given the relative scarcity of muscle  
398 stem cells and fibro-adipogenic progenitors. Live cells and "depleted" cells were pooled at a 1:1 ratio  
399 and a total of 16,000-24,000 cells used for scRNA sequencing.

400



401 **Single-cell RNA sequencing library generation**

402 Cells were collected for single-cell RNA-seq analysis as described above. Single-cell RNA-seq libraries  
403 were generated using Chromium Next GEM Single Cell 3' Reagent Kits v3.1 (10x Genomics) according  
404 to the manufacturer's protocol.

405

406 **Immunofluorescent staining**

407 Human skeletal muscle samples from both ischemic (distal) and non-ischemic (proximal) muscle were  
408 obtained from surgical amputation specimens. Tissue was harvested and embedded in OCT compound  
409 using liquid nitrogen. 8  $\mu\text{m}$  sections were prepared on microscope slides using cryostat sectioning for  
410 histological analysis. Frozen sections were allowed to come to room temperature and fixed in 4%  
411 paraformaldehyde for 10 minutes, permeabilized with 0.1% Triton X-100 in PBS for 5 minutes and then  
412 washed in PBS. Blocking solution (5% normal donkey serum in PBS) was applied for 30 minutes at  
413 room temperature followed by primary antibody staining overnight at 4°C using anti-CD206 (R&D  
414 systems, AF2534), anti-CD11b (Cell Sciences, MON1019-1, clone Bear-1), and anti-dystrophin  
415 (Thermo Scientific, RB-9024-P). Tissue sections were then washed using PBS, incubated with the  
416 secondary antibody (ThermoFisher Scientific) for 1 hour at room temperature, and counterstained with  
417 1 $\mu\text{g}/\text{mL}$  Hoechst 33342 (Thermo Scientific, 6629) for 5 minutes at room temperature. The tissue  
418 sections were mounted with Fluoromount-G<sup>TM</sup> Mounting Medium (ThermoFischer Scientific, 00-4958-  
419 02). Images were acquired using a Zeiss Axio Imager Z2 Upright Microscope at x200 magnification.

420

421 **Macrophage isolation using FACS**

422 Hind limb muscles were collected from C57BL/6 and BALB/c mice at day 3 after HLI surgery. Single  
423 cell suspensions were generated as described above. Cells were blocked with purified anti-mouse  
424 CD16/32 antibody (Biolegend, #101301) for 10 minutes. Primary antibody staining was performed using  
425 anti-CD45-Alexa Fluor 488 (clone HI30, Invitrogen, MHCD4520), anti-CD11b (clone M1/70, Invitrogen,  
426 12-0112-81), and anti-F4/80-biotin (clone A3-1, Bio-rad, MCA497BT) antibodies for 40 minutes.

427 Streptavidin-PE/Cy7 (Biolegend, 405206) was used as a secondary reagent for anti-F4/80-biotin  
428 (PMID: 25896247). Using FACS, macrophages were isolated by PI-/CD45+/CD11b+/F480+ gating.

429

### 430 **Bulk RNA sequencing**

431 Total RNA was extracted using TRIzol Reagent (Invitrogen) according to manufacturer's protocol. First-  
432 strand reverse transcription and template switching was performed using an Oligo(dT) primer (dT30VN-  
433 ME-A), a locked nucleic acid-containing TSO (NotI-TSO), and Superscript IV reverse transcriptase  
434 (Invitrogen, # 18090050). PCR preamplification of cDNA was performed with IS PCR and Tn5ME-A-  
435 aHic using 2X KAPA PCR mix (Kapa Biosystem, KK2602) followed by cleanup using SPRISelect beads  
436 (Beckman Coulter, REF B23319). DNA was digested by NotI-HF (NEB, #R3189L), tagmented using  
437 Tn5 assembled with adaptors Tn5ME-A/Tn5MErev and Tn5ME-B/Tn5MErev. A Zymo DNA clean and  
438 concentrator kit (Zymo, R1014 ) was utilized <sup>45</sup>. Library PCR was performed using unique combinations  
439 of Nextera-PCR i5/i7 primers. DNA strands between 400-600bp were selected by gel extraction using  
440 Zymoclean Gel DNA recovery kit (Zymo, #D4002). DNA libraries were submitted for next-generation  
441 sequencing using paired-end sequencing.

442

### 443 **RNAscope *In situ* hybridization procedure**

444 Mouse tibialis anterior was harvested on day 3 after HLI and embedded in OCT compound in ice-cold  
445 isopentane. Cryostat sections (10  $\mu$ m) were prepared on microscope slides (Superfrost Plus, Fisher  
446 Scientific), and immediately stored at -80°C until use. Samples for RNAscope® (Advanced Cell  
447 Diagnostics) were processed according to the manufacturer's guidelines for preparing fresh frozen  
448 tissue. Muscle sections were pre-treated with protease IV (RNAscope® protease III and IV reagents,  
449 ACD, 322340) for 15 minutes and incubated in the desired probes [ADGRE1 (F4/80), ACD) and Myod1  
450 (ACD)] for 2 hours at 40°C in the EZ Hybridization oven. RNAscope *In situ* hybridization was performed  
451 using RNAscope® Fluorescent Multiplex Assay Detecting Reagents kit (ACD, 320851) according to the  
452 manufacturer's protocols. Images were acquired using a Zeiss Axio Imager Z2 Upright Microscope at

453 x400 magnification. Images analysis was performed according to the RNAscope® Data Analysis guide  
454 (ACD).

455

#### 456 **Cell proliferation assay**

457 Skeletal muscle stem cells were isolated from uninjured young adult C57BL/6 and BALB/c hindlimb  
458 skeletal muscle and myogenic cells were expanded in culture using an established protocol <sup>46</sup>. Cells  
459 were seeded in 96-well plates and 24 hours after plating treated with: THBS1 (R&D systems, 7859-TH-  
460 050), syndecan-4 Ab (BD Pharmingen, 550350), normal rat IgG2a (EMD Millipore, MABF 1077Z), IGF-  
461 1 (R&D systems, 791-MG), FGF2 (Thermo Fisher, PHG0367) or vehicle (PBS) for 24 hours. After 72  
462 hours of culture with the indicated ligands EdU was added to the medium, the cells were cultured for an  
463 additional 6 hours, and then fixed. Cells were analyzed using the Click-iT EdU Cell Proliferation Kit for  
464 Imaging (Invitrogen, C10337) according to the manufacturer's instructions.

465

#### 466 **Single cell RNA-seq data processing and analysis**

467 The sequencing reads (10x Genomics) were processed using the Cell Ranger pipeline (v3.1.0,) with  
468 GRCm38 reference genome. The output filtered matrices of different samples as input files for  
469 downstream analyses using the R package Seurat (v4.0.1) <sup>47</sup>. Genes expressed by less than 3 cells  
470 were removed. Cells with unique feature counts over 4100, under 1000, or greater than 25%  
471 mitochondrial RNA counts were filtered. Meanwhile, cells that were recognized as doublets by the  
472 Python package Scrublet (v0.2.3) were removed. The different Seurat objects from different samples  
473 were combined to create a new object.

474

475 The gene expression levels of the combined object for each cell were normalized and log-  
476 transformed by NormalizeData function. Scaled data of all cells by ScaleData function was used for  
477 principal component analysis based on 2000 highly variable genes with RunPCA function. The  
478 harmony algorithm was then used to correct the batch correction <sup>48</sup>. The resulting Harmony

479 embeddings instead of PCA was used in non-linear dimensional reduction and nearest neighbor graph  
480 construction. The clusters were defined using FindClusters function and marker genes for each cluster  
481 were identified by running the FindAllMarkers function. Cell type of the clusters were annotated  
482 according to these marker genes. These steps were also used to human scRNA-seq data analysis and  
483 mouse macrophage sub-clusters. The AddModuleScore function was used to calculate module scores  
484 for feature expression programs related to inflammatory response in macrophages. The differentially  
485 expressed genes (DEGs) were identified by FindMarkers function. The gene sets for the macrophage  
486 GSEA analysis were download from MSigDB. <sup>49-51</sup>

487

488 The satellite cells were exacted from the Seurat object of each sample for the sctransform  
489 normalization and then were merged as a new object. The SelectIntegrationFeatures function was used  
490 to choose the top scoring features for the satellite cell integrated object. Then the umap and sub-  
491 clusters were defined with the above steps (RunPCA, RunHarmony, RunUMAP, FindNeighbors,  
492 FindClusters). The trajectory inference and pseudotime calculations on the integrated object were  
493 performed using the Monocle3 <sup>52</sup>. Cell-cell communication between macrophages and satellite cells  
494 was inferred using CellphoneDB v3.1 <sup>37,53</sup> and CellChat v1.4<sup>41</sup>.

495

### 496 **Bulk RNA-seq data analysis**

497 The reads from bulk RNA-seq library were aligned to GRCm38 reference genome by STAR v2.7.4a  
498 with "--sjdbOverhang 99" <sup>54</sup>. FeatureCounts v1.6.3 was used to determine the read counts for each  
499 gene <sup>55</sup>. The DEGs were identified using DESeq2 v1.30.1 with the threshold that adjusted p-value less  
500 than  $\square$ 0.05 and fold change greater than 2. GO enrichment analysis was performed with these DEGs  
501 via DAVID <sup>56,57</sup>. The bigwig files generated by bamCoverage v3.5.1 <sup>58</sup> with RPKM normalization method  
502 from alignment of reads (bam files) were used to read coverage visualization through Integrative  
503 Genomics Viewer (IGV v 2.11.9)<sup>59</sup>

504

505 **REFERENCES:**

- 506 1. Gutierrez, J.A., Aday, A.W., Patel, M.R., and Jones, W.S. (2019). Polyvascular Disease:  
507 Reappraisal of the Current Clinical Landscape. *Circ. Cardiovasc. Interv.* *12*, e007385.
- 508 2. Morley, R.L., Sharma, A., Horsch, A.D., and Hinchliffe, R.J. (2018). Peripheral artery disease. *BMJ*  
509 *360*, j5842.
- 510 3. Kullo, I.J., and Rooke, T.W. (2016). CLINICAL PRACTICE. Peripheral Artery Disease. *N. Engl. J.*  
511 *Med.* *374*, 861–871.
- 512 4. Fowkes, F.G.R., Aboyans, V., Fowkes, F.J.I., McDermott, M.M., Sampson, U.K.A., and Criqui,  
513 M.H. (2017). Peripheral artery disease: epidemiology and global perspectives. *Nat. Rev. Cardiol.*  
514 *14*, 156–170.
- 515 5. Criqui, M.H., and Aboyans, V. (2015). Epidemiology of peripheral artery disease. *Circ. Res.* *116*,  
516 1509–1526.
- 517 6. Farber, A. (2018). Chronic Limb-Threatening Ischemia. *N. Engl. J. Med.* *379*, 171–180.
- 518 7. Duff, S., Mafilios, M.S., Bhounsule, P., and Hasegawa, J.T. (2019). The burden of critical limb  
519 ischemia: a review of recent literature. *Vasc. Health Risk Manag.* *15*, 187–208.
- 520 8. Farber, A., Menard, M.T., Conte, M.S., Kaufman, J.A., Powell, R.J., Choudhry, N.K., Hamza, T.H.,  
521 Assmann, S.F., Creager, M.A., Cziraky, M.J., et al. (2022). Surgery or Endovascular Therapy for  
522 Chronic Limb-Threatening Ischemia. *N. Engl. J. Med.* *387*, 2305–2316.
- 523 9. Fadini, G.P., Spinetti, G., Santopaolo, M., and Madeddu, P. (2020). Impaired Regeneration  
524 Contributes to Poor Outcomes in Diabetic Peripheral Artery Disease. *Arterioscler. Thromb. Vasc.*  
525 *Biol.* *40*, 34–44.
- 526 10. Aranguren, X.L., Verfaillie, C.M., and Luttun, A. (2009). Emerging hurdles in stem cell therapy for  
527 peripheral vascular disease. *J. Mol. Med.* *87*, 3–16.
- 528 11. Pizzimenti, M., Meyer, A., Charles, A.-L., Giannini, M., Chakfé, N., Lejay, A., and Geny, B. (2020).  
529 Sarcopenia and peripheral arterial disease: a systematic review. *J. Cachexia Sarcopenia Muscle*  
530 *11*, 866–886.
- 531 12. McClung, J.M., McCord, T.J., Ryan, T.E., Schmidt, C.A., Green, T.D., Southerland, K.W.,  
532 Reinardy, J.L., Mueller, S.B., Venkatraman, T.N., Lascola, C.D., et al. (2017). BAG3 (Bcl-2-  
533 Associated Athanogene-3) Coding Variant in Mice Determines Susceptibility to Ischemic Limb  
534 Muscle Myopathy by Directing Autophagy. *Circulation* *136*, 281–296.
- 535 13. McClung, J.M., McCord, T.J., Southerland, K., Schmidt, C.A., Padgett, M.E., Ryan, T.E., and  
536 Kontos, C.D. (2016). Subacute limb ischemia induces skeletal muscle injury in genetically  
537 susceptible mice independent of vascular density. *J. Vasc. Surg.* *64*, 1101–1111.e2.
- 538 14. Polonsky, T.S., and McDermott, M.M. (2021). Lower Extremity Peripheral Artery Disease Without

- 539 Chronic Limb-Threatening Ischemia: A Review. *JAMA* 325, 2188–2198.
- 540 15. Conte, M.S. (2017). Data, guidelines, and practice of revascularization for claudication. *J. Vasc.*  
541 *Surg.* 66, 911–915.
- 542 16. Sukul, D., Grey, S.F., Henke, P.K., Gurm, H.S., and Grossman, P.M. (2017). Heterogeneity of  
543 Ankle-Brachial Indices in Patients Undergoing Revascularization for Critical Limb Ischemia. *JACC*  
544 *Cardiovasc. Interv.* 10, 2307–2316.
- 545 17. Cong, G., Cui, X., Ferrari, R., Pipinos, I.I., Casale, G.P., Chattopadhyay, A., and Sachdev, U.  
546 (2020). Fibrosis Distinguishes Critical Limb Ischemia Patients from Claudicants in a Transcriptomic  
547 and Histologic Analysis. *J. Clin. Med. Res.* 9. 10.3390/jcm9123974.
- 548 18. Ryan, T.E., Yamaguchi, D.J., Schmidt, C.A., Zeczycki, T.N., Shaikh, S.R., Brophy, P., Green, T.D.,  
549 Tarpey, M.D., Karnekar, R., Goldberg, E.J., et al. (2018). Extensive skeletal muscle cell  
550 mitochondriopathy distinguishes critical limb ischemia patients from claudicants. *JCI Insight* 3.  
551 10.1172/jci.insight.123235.
- 552 19. McClung, J.M., McCord, T.J., Keum, S., Johnson, S., Annex, B.H., Marchuk, D.A., and Kontos,  
553 C.D. (2012). Skeletal muscle-specific genetic determinants contribute to the differential strain-  
554 dependent effects of hindlimb ischemia in mice. *Am. J. Pathol.* 180, 2156–2169.
- 555 20. Sousa-Victor, P., García-Prat, L., and Muñoz-Cánoves, P. (2022). Control of satellite cell function  
556 in muscle regeneration and its disruption in ageing. *Nat. Rev. Mol. Cell Biol.* 23, 204–226.
- 557 21. van Velthoven, C.T.J., and Rando, T.A. (2019). Stem Cell Quiescence: Dynamism, Restraint, and  
558 Cellular Idling. *Cell Stem Cell* 24, 213–225.
- 559 22. Chazaud, B. (2020). Inflammation and Skeletal Muscle Regeneration: Leave It to the  
560 Macrophages! *Trends Immunol.* 41, 481–492.
- 561 23. Dort, J., Fabre, P., Molina, T., and Dumont, N.A. (2019). Macrophages Are Key Regulators of Stem  
562 Cells during Skeletal Muscle Regeneration and Diseases. *Stem Cells Int.* 2019, 4761427.
- 563 24. Rybalko, V., Hsieh, P.-L., Merscham-Banda, M., Suggs, L.J., and Farrar, R.P. (2015). The  
564 Development of Macrophage-Mediated Cell Therapy to Improve Skeletal Muscle Function after  
565 Injury. *PLoS One* 10, e0145550.
- 566 25. Wosczyzna, M.N., and Rando, T.A. (2018). A Muscle Stem Cell Support Group: Coordinated  
567 Cellular Responses in Muscle Regeneration. *Dev. Cell* 46, 135–143.
- 568 26. Tidball, J.G. (2017). Regulation of muscle growth and regeneration by the immune system. *Nat.*  
569 *Rev. Immunol.* 17, 165–178.
- 570 27. Varga, T., Mounier, R., Horvath, A., Cuvellier, S., Dumont, F., Poliska, S., Ardjoune, H., Juban, G.,  
571 Nagy, L., and Chazaud, B. (2016). Highly Dynamic Transcriptional Signature of Distinct  
572 Macrophage Subsets during Sterile Inflammation, Resolution, and Tissue Repair. *J. Immunol.* 196,

- 573 4771–4782.
- 574 28. Shi, C., and Pamer, E.G. (2011). Monocyte recruitment during infection and inflammation. *Nat.*  
575 *Rev. Immunol.* *11*, 762–774.
- 576 29. Kosmac, K., Peck, B.D., Walton, R.G., Mula, J., Kern, P.A., Bamman, M.M., Dennis, R.A., Jacobs,  
577 C.A., Lattermann, C., Johnson, D.L., et al. (2018). Immunohistochemical Identification of Human  
578 Skeletal Muscle Macrophages. *Bio Protoc* *8*. 10.21769/BioProtoc.2883.
- 579 30. Kosmac, K., Gonzalez-Freire, M., McDermott, M.M., White, S.H., Walton, R.G., Sufit, R.L., Tian, L.,  
580 Li, L., Kibbe, M.R., Criqui, M.H., et al. (2020). Correlations of Calf Muscle Macrophage Content  
581 With Muscle Properties and Walking Performance in Peripheral Artery Disease. *J. Am. Heart*  
582 *Assoc.* *9*, e015929.
- 583 31. Schmidt, C.A., Amorese, A.J., Ryan, T.E., Goldberg, E.J., Tarpey, M.D., Green, T.D., Karnekar,  
584 R.R., Yamaguchi, D.J., Spangenburg, E.E., and McClung, J.M. (2018). Strain-Dependent Variation  
585 in Acute Ischemic Muscle Injury. *Am. J. Pathol.* *188*, 1246–1262.
- 586 32. Gordon, S. (2003). Alternative activation of macrophages. *Nat. Rev. Immunol.* *3*, 23–35.
- 587 33. Tonkin, J., Temmerman, L., Sampson, R.D., Gallego-Colon, E., Barberi, L., Bilbao, D., Schneider,  
588 M.D., Musarò, A., and Rosenthal, N. (2015). Monocyte/Macrophage-derived IGF-1 Orchestrates  
589 Murine Skeletal Muscle Regeneration and Modulates Autocrine Polarization. *Mol. Ther.* *23*, 1189–  
590 1200.
- 591 34. Patsalos, A., Simandi, Z., Hays, T.T., Peloquin, M., Hajian, M., Restrepo, I., Coen, P.M., Russell,  
592 A.J., and Nagy, L. (2018). In vivo GDF3 administration abrogates aging related muscle  
593 regeneration delay following acute sterile injury. *Aging Cell* *17*, e12815.
- 594 35. Lepper, C., Partridge, T.A., and Fan, C.-M. (2011). An absolute requirement for Pax7-positive  
595 satellite cells in acute injury-induced skeletal muscle regeneration. *Development* *138*, 3639–3646.
- 596 36. Relaix, F., Bencze, M., Borok, M.J., Der Vartanian, A., Gattazzo, F., Mademtzoglou, D., Perez-  
597 Diaz, S., Prola, A., Reyes-Fernandez, P.C., Rotini, A., et al. (2021). Perspectives on skeletal  
598 muscle stem cells. *Nat. Commun.* *12*, 692.
- 599 37. Efremova, M., Vento-Tormo, M., Teichmann, S.A., and Vento-Tormo, R. (2020). CellPhoneDB:  
600 inferring cell-cell communication from combined expression of multi-subunit ligand-receptor  
601 complexes. *Nat. Protoc.* *15*, 1484–1506.
- 602 38. Liu, D., Black, B.L., and Derynck, R. (2001). TGF-beta inhibits muscle differentiation through  
603 functional repression of myogenic transcription factors by Smad3. *Genes Dev.* *15*, 2950–2966.
- 604 39. Brennan, T.J., Edmondson, D.G., Li, L., and Olson, E.N. (1991). Transforming growth factor beta  
605 represses the actions of myogenin through a mechanism independent of DNA binding. *Proc. Natl.*  
606 *Acad. Sci. U. S. A.* *88*, 3822–3826.

- 607 40. De Micheli, A.J., Spector, J.A., Elemento, O., and Cosgrove, B.D. (2020). A reference single-cell  
608 transcriptomic atlas of human skeletal muscle tissue reveals bifurcated muscle stem cell  
609 populations. *Skelet. Muscle* 10, 19.
- 610 41. Jin, S., Guerrero-Juarez, C.F., Zhang, L., Chang, I., Ramos, R., Kuan, C.-H., Myung, P., Plikus,  
611 M.V., and Nie, Q. (2021). Inference and analysis of cell-cell communication using CellChat. *Nat.*  
612 *Commun.* 12, 1088.
- 613 42. Paliwal, P., Pishesha, N., Wijaya, D., and Conboy, I.M. (2012). Age dependent increase in the  
614 levels of osteopontin inhibits skeletal muscle regeneration. *Aging* 4, 553–566.
- 615 43. Juhas, M., Abutaleb, N., Wang, J.T., Ye, J., Shaikh, Z., Sriworarat, C., Qian, Y., and Bursac, N.  
616 (2018). Incorporation of macrophages into engineered skeletal muscle enables enhanced muscle  
617 regeneration. *Nat Biomed Eng* 2, 942–954.
- 618 44. Dokun, A.O., Keum, S., Hazarika, S., Li, Y., Lamonte, G.M., Wheeler, F., Marchuk, D.A., and  
619 Annex, B.H. (2008). A quantitative trait locus (LSq-1) on mouse chromosome 7 is linked to the  
620 absence of tissue loss after surgical hindlimb ischemia. *Circulation* 117, 1207–1215.
- 621 45. Picelli, S., Faridani, O.R., Björklund, A.K., Winberg, G., Sagasser, S., and Sandberg, R. (2014).  
622 Full-length RNA-seq from single cells using Smart-seq2. *Nat. Protoc.* 9, 171–181.
- 623 46. Liu, L., Cheung, T.H., Charville, G.W., and Rando, T.A. (2015). Isolation of skeletal muscle stem  
624 cells by fluorescence-activated cell sorting. *Nat. Protoc.* 10, 1612–1624.
- 625 47. Hao, Y., Hao, S., Andersen-Nissen, E., Mauck, W.M., 3rd, Zheng, S., Butler, A., Lee, M.J., Wilk,  
626 A.J., Darby, C., Zager, M., et al. (2021). Integrated analysis of multimodal single-cell data. *Cell*  
627 184, 3573–3587.e29.
- 628 48. Korsunsky, I., Millard, N., Fan, J., Slowikowski, K., Zhang, F., Wei, K., Baglaenko, Y., Brenner, M.,  
629 Loh, P.-R., and Raychaudhuri, S. (2019). Fast, sensitive and accurate integration of single-cell  
630 data with Harmony. *Nat. Methods* 16, 1289–1296.
- 631 49. Subramanian, A., Tamayo, P., Mootha, V.K., Mukherjee, S., Ebert, B.L., Gillette, M.A., Paulovich,  
632 A., Pomeroy, S.L., Golub, T.R., Lander, E.S., et al. (2005). Gene set enrichment analysis: a  
633 knowledge-based approach for interpreting genome-wide expression profiles. *Proc. Natl. Acad.*  
634 *Sci. U. S. A.* 102, 15545–15550.
- 635 50. Coates, P.J., Rundle, J.K., Lorimore, S.A., and Wright, E.G. (2008). Indirect macrophage  
636 responses to ionizing radiation: implications for genotype-dependent bystander signaling. *Cancer*  
637 *Res.* 68, 450–456.
- 638 51. Liberzon, A., Subramanian, A., Pinchback, R., Thorvaldsdóttir, H., Tamayo, P., and Mesirov, J.P.  
639 (2011). Molecular signatures database (MSigDB) 3.0. *Bioinformatics* 27, 1739–1740.
- 640 52. Cao, J., Spielmann, M., Qiu, X., Huang, X., Ibrahim, D.M., Hill, A.J., Zhang, F., Mundlos, S.,



- 641 Christiansen, L., Steemers, F.J., et al. (2019). The single-cell transcriptional landscape of  
642 mammalian organogenesis. *Nature* 566, 496–502.
- 643 53. Garcia-Alonso, L., Handfield, L.-F., Roberts, K., Nikolakopoulou, K., Fernando, R.C., Gardner, L.,  
644 Woodhams, B., Arutyunyan, A., Polanski, K., Hoo, R., et al. (2021). Mapping the temporal and  
645 spatial dynamics of the human endometrium in vivo and in vitro. *Nat. Genet.* 53, 1698–1711.
- 646 54. Dobin, A., Davis, C.A., Schlesinger, F., Drenkow, J., Zaleski, C., Jha, S., Batut, P., Chaisson, M.,  
647 and Gingeras, T.R. (2013). STAR: ultrafast universal RNA-seq aligner. *Bioinformatics* 29, 15–21.
- 648 55. Liao, Y., Smyth, G.K., and Shi, W. (2014). featureCounts: an efficient general purpose program for  
649 assigning sequence reads to genomic features. *Bioinformatics* 30, 923–930.
- 650 56. Sherman, B.T., Hao, M., Qiu, J., Jiao, X., Baseler, M.W., Lane, H.C., Imamichi, T., and Chang, W.  
651 (2022). DAVID: a web server for functional enrichment analysis and functional annotation of gene  
652 lists (2021 update). *Nucleic Acids Res.* 50, W216–W221.
- 653 57. Huang, D.W., Sherman, B.T., and Lempicki, R.A. (2009). Systematic and integrative analysis of  
654 large gene lists using DAVID bioinformatics resources. *Nat. Protoc.* 4, 44–57.
- 655 58. Ramírez, F., Ryan, D.P., Grüning, B., Bhardwaj, V., Kilpert, F., Richter, A.S., Heyne, S., Dündar,  
656 F., and Manke, T. (2016). deepTools2: a next generation web server for deep-sequencing data  
657 analysis. *Nucleic Acids Res.* 44, W160–W165.
- 658 59. Robinson, J.T., Thorvaldsdóttir, H., Winckler, W., Guttman, M., Lander, E.S., Getz, G., and  
659 Mesirov, J.P. (2011). Integrative genomics viewer. *Nat. Biotechnol.* 29, 24–26.
- 660
- 661

662 **FIGURE LEGENDS:**

663 **Figures 1 – 6**

664

665 **Figure 1. Single-cell transcriptional profiling of human CLTI patients' limb muscle in non-**  
666 **ischemic versus ischemic conditions.**

667 **A:** Schematic diagram illustrating the generation of scRNA-seq datasets using proximal and distal  
668 tissue from human CLTI skeletal muscle.

669 **B:** Uniform Manifold Approximation Projection (UMAP) visualization showing cell populations  
670 (n=16,201) from non-ischemic and ischemic tissues of CLTI patients (n=3 donors, paired proximal and  
671 distal tissues were analyzed).

672 **C:** Dot plot displaying the expression of marker genes for each cell population. Dot size represents the  
673 percentage of cells that positively detect the transcripts, and the color scale indicates average  
674 expression levels.

675 **D-E:** UMAP visualization of macrophages in non-ischemic and ischemic skeletal muscle, colored by  
676 condition (D, red for distal, blue for proximal) and sub-clusters (E, C0-C8).

677 **F:** Top five GO terms enriched by differentially expressed genes (P-value < 0.05 & log2FoldChange >  
678 0.25) between ischemic-specific clusters (1 and 2) and non-ischemic-specific cluster (0). Red and blue  
679 bars represent the GO terms enriched in distal and proximal conditions, respectively.

680 **G:** Feature plots showing the expression of pro-inflammatory genes in macrophages.

681 **H:** Quantification of representative pro-inflammatory gene expression in proximal versus distal  
682 macrophages.

683 **I:** Quantification of CD11b+/CD206+ and CD11b+/CD206- macrophages in ischemic and non-ischemic  
684 CLTI patient muscle specimens. Data are expressed as mean  $\pm$  SEM. \*p  $\leq$  0.05.

685

686 **Figure 2. Single-cell RNA-seq analysis of hind limb ischemia (HLI) surgery induced limb muscle**  
687 **regeneration and damage responses in C57BL/6 and BALB/c mice.**

688 **A:** Perfusion imaging of C57BL/6 (top) and BALB/c (bottom) mouse strains before and after HLI surgery  
689 (Pre-operatively and Post-operatively, respectively) and on post-op days 1, 3, and 7.

690 **B:** (Left) Quantification of limb perfusion as determined by perfusion imaging at indicated timepoints.  
691 Left hindlimb (HLI surgery) perfusion normalized to right hindlimb perfusion for each mouse (n=3 per  
692 mouse strain, per timepoint). \*p<0.01. (Right) Representative images of mice on post-op days 1, 3, and  
693 7 following HLI surgery. Red arrow indicates ischemic changes apparent on post-op days 3 and 7 in  
694 BALB/c mice.

695 **C:** Representative immunofluorescence staining images of mice on post-op day 7 following HLI  
696 surgery. eMHC (red) indicates regenerated muscle fibers; Pax7 (green) indicates satellite cells.

697 **D:** Quantification of eMHC+ area (Left panel) and Pax7+ cell counts (Right panel) shown in (C). Data  
698 expressed as mean  $\pm$  SEM. \*p $\leq$ 0.05, \*\*p $\leq$ 0.01.

699 **E:** Experimental design of mice scRNA-seq analysis of mouse models of HLI (n=2 per mouse strain,  
700 per timepoint).

701 **F:** UMAP visualization of the scRNA-seq atlas assembled from all samples and time points.

702 **G:** The expression of cell type marker genes used for each cell type/cluster annotated in (F).

703

704 **Figure 3. scRNA-seq analyses reveals that the pro-inflammatory macrophages are enriched in**  
705 **the BALB/c limb following HLI surgery.**

706 **A:** UMAP visualization of all cells (left) and macrophages (right) from C57BL/6 and BALB/c mice at  
707 indicated time. (left) The UMAP contains all the mouse cells from all time points in two strains. Blue  
708 cells: macrophages.

709 **B:** The inflammatory gene module score is high in cluster 5 cells, which are specific to BALB/c mice.

710 **C:** GSEA enrichment analysis reveals that M1 macrophage markers are highly expressed in BALB/c  
711 macrophages, while M2 macrophage markers are highly expressed in C57BL/6 macrophages.  
712 Macrophage gene expression patterns are assessed using scRNA-seq data.

713 D: Dot plot showing differentially expressed genes in macrophages between C57BL/6 and BALB/c mice  
714 on day 3 post-ischemia. Dot size represents  $-\log_{10}$  FDR; color scale indicates  $\log_2$ -fold change in gene  
715 expression.

716 E: Volcano plot displaying differentially expressed genes from bulk RNA-seq analysis of macrophages  
717 purified from BALB/c and C57BL/6 mice at 3 days post-HLI. Red and blue dots represent upregulated  
718 genes in C57BL/6 and BALB/c mice, respectively.

719 F: Genome browser views of bulk RNA-seq data at the indicated gene loci in macrophages from both  
720 strains on day 3. Numbers in brackets indicate the range of signal intensities.

721 G: Top five GO terms enriched by differentially expressed genes ( $FDR < 0.05$ ,  $\log_2 \text{FoldChange} > 1$ ) from  
722 panel E. Red and blue bars correspond to C57BL/6 and BALB/c mice, respectively.

723

724 **Figure 4. MuSCs/MPCs in BALB/c mice undergo precocious differentiation after HLI surgery.**

725 **A:** UMAP visualization of muscle stem cells (MuSCs) and muscle precursor cells (MPC) that are  
726 quiescent (yellow), activated/proliferative (blue), and differentiating (pink). Total MuSC/MPC,  $n=9217$ .

727 **B:** All MuSCs/MPCs shown in (A) are ranked along a pseudotime trajectory, starting from quiescent  
728 cells progressing towards activated/proliferative and differentiating cells. The color of the heatmap  
729 indicates the expression level of the indicated genes in MuSC/MPCs aligned along the pseudotime.

730 **C:** Violin plot showing the distribution of quiescent (yellow), activated/proliferative (blue), and  
731 differentiating (pink) MuSCs/MPCs in the two strains along the pseudotime trajectory shown in (B).

732 **D:** Curve plot showing the distribution of MuSC/MPCs at each time point (before and after HLI surgery)  
733 in the two mouse strains along the pseudotime trajectory shown in (B).

734 **E:** RNAscope data showing that Adgre1+ macrophages (F4/80, green) and Myod1+ MuSC/MPCs (red)  
735 are spatially proximal to each other in the limb muscle of BALB/c and C57BL/6 mice at day 3 after HLI.

736 **F:** Inferred ligand-receptor interactions between macrophages and MuSCs in BALB/c and C57BL/6  
737 following HLI at 3 days post HLI surgery.

738 **G:** GSEA plot of gene set related to skeletal muscle cell proliferation between C57BL/6 and BALB/c  
739 mice.

740 **H:** IGF1 promotes proliferation of primary MPCs purified from BALB/c and C57BL/6 strains. (Left)  
741 Representative images of EdU incorporation by C57BL/6 and BALB/c primary MPCs cultured with or  
742 without recombinant IGF1 for 72 hours. EdU was added to the culture medium 6 hours prior to cell  
743 fixation and imaging. Nuclei stained with Hoechst. Arrows indicate EdU+ cells. (Right) Quantification of  
744 the percentage of EdU+ cells for the indicated strains and treatment conditions. \*P<0.05, \*\*P<0.005.

745

746 **Figure 5. Increased pro-inflammatory signaling between macrophages and MuSC/MPCs and**  
747 **dysregulated cell state of MuSC/MPCs in the ischemia-damaged human limb of CLTI patients.**

748 **A:** UMAP visualization of single-cell data from human skeletal muscle in 3 CLTI patients, including both  
749 proximal and distal conditions, and 10 healthy individuals. A total of 34,950 cells are plotted on the  
750 UMAP.

751 **B:** Feature plots displaying gene expression of PAX7 mRNA in quiescent MuSCs and MyoG mRNA in  
752 activated MuSC/MPCs.

753 **C:** The inferred strength and the number of signaling interactions calculated by CellChat between  
754 macrophages and MuSCs in ischemic and non-ischemic muscles of CLTI patients.

755 **D:** The significant signaling pathways between macrophages and MuSCs/MPCs are ranked based on  
756 their inferred strength differences between ischemic and non-ischemic skeletal muscles. Signaling  
757 pathways colored in red are enriched in ischemic muscle, while those colored in blue are enriched in  
758 non-ischemic conditions.

759 **E, F: (E)** The MuSC/MPCs (clusters 2 and 13 shown in **A**) are plotted on a new UMAP space with  
760 increased resolution to visualize the differences in MuSCs/MPCs. **(F)** In this new UMAP, cells in  
761 clusters 2 and 4, defined as active MuSCs, express high levels of differentiation marker MyoG, while  
762 cells in clusters 0 and 1, defined as quiescent MuSCs, express high levels of quiescent marker Pax7.

763 **G:** Ligand-receptor interactions inferred by CellPhoneDB between macrophages and  
764 activated/quiescent MuSCs in ischemic and non-ischemic conditions. In distal conditions, we observed  
765 stronger pro-inflammatory signaling pathways, such as IL6, CCL4, and SPP1, compared to proximal  
766 conditions.

767 **H:** In distal muscle of CLTI patients, the active MuSCs express the highest level of myogenic  
768 differentiation marker MyoG, indicating precocious differentiation; while quiescent MuSCs express the  
769 lowest level of quiescent/self-renewal marker SPRY1, indicating loss of stem cell quiescence. Violin  
770 plots show the expression of MyoG and SPR1 in active and quiescent MuSCs in the indicated  
771 conditions in healthy and CLTI patients. \* P-value < 0.05; \*\* P-value < 0.01. P-values were calculated  
772 using the FindMarkers function of the Seurat R package with the Wilcoxon test method.

773

774

775 **SUPPLEMENTARY FIGURES AND TABLES**

776

777 **Supplementary Figures 1-6, and Supplementary Tables 1-4.**

778

779 **Supplementary Figure 1. Single-cell transcriptome analysis of skeletal muscle in human CLTI**  
780 **patients. Related to Figure 1.**

781 **A:** Representative computed tomography angiography images from three PAD patients, demonstrating  
782 similar atherosclerotic lesions and degrees of perfusion in patients with disparate clinical phenotypes.  
783 Ankle brachial index (ABI).

784 **B:** UMAP embedding of single-cell RNA-seq profiles from non-ischemic and ischemic skeletal muscle  
785 samples from three CLTI patients. Cells are colored by patient and tissue condition.

786 **C:** Feature plots showing the expression of the indicated cell type-specific marker genes.

787 **D:** Representative immunofluorescence images of macrophages in ischemic and non-ischemic muscle  
788 of CLTI patients. CD11b+ (green), CD206+ (red). DAPI (blue).

789

790 **Supplementary Figure 2. Single-cell RNA-seq atlas of limb muscle regeneration and damage in**  
791 **C57BL/6 and BALB/c mouse strains following HLI surgery. Related to Figure 2.**

792 **A:** UMAP visualization of cells from BALB/c mice at indicated times before and after HLI surgery.

793 **B:** UMAP visualization of cells from C57BL/6 mice at indicated times before and after HLI surgery.

794 **C:** Feature plots highlighting mRNA expression of the indicated cell type-specific marker genes in each  
795 cell cluster.

796

797 **Supplementary Figure 3. Distinct macrophage populations in C57BL/6 and BALB/c mice**  
798 **following limb ischemia. Related to Figure 3.**

799 **A:** UMAP visualization of all macrophages from two mouse strains and four time points. Total number of  
800 macrophages: n=26,991.

801 **B:** Heatmap showing expression levels of marker genes in each sub-cluster of macrophages shown in

802 **A.**

803 **C:** FACS plot showing that CD45+/CD11b+/F4/80+ macrophages were purified from the hindlimb

804 muscle of the two mouse strains at 3 days after HLI for bulk RNA-seq analysis.

805 **D:** Genome browser views of bulk RNA-seq data at Gdf3 and Igf1 loci in macrophages purified from the

806 two mouse strains at day 3 post-HLI surgery.

807

808 **Supplementary Figure 4. Single-cell analysis of MuSCs/MPCs in C57BL/6 and BALB/c mice**

809 **before and after HLI surgery. Related to Figure 4.**

810 **A:** Feature plots highlighting mRNA expression of the indicated genes in sub-clusters of MuSCs/MPCs.

811 **B:** UMAP embedding of the pseudotime trajectories of MuSCs/MPCs. Color key: pseudotimes.

812 **C:** Violin plot showing Igf1r expression in MuSC/MPCs of BALB/c versus C57BL/6 mice at 3 days post-

813 HLI surgery.

814

815 **Supplementary Figure 5. Dysregulation of macrophage-MuSC crosstalk and MuSC cell states in**

816 **ischemia-damaged human muscle of CLTI patients. Related to Figure 5.**

817 **A:** Proportion of MuSCs/MPCs among all cells in proximal and distal skeletal muscle tissue from three

818 CLTI patients. Cell numbers are quantified by scRNA-seq data.

819 **B:** Representative immunofluorescence images of MuSCs (PAX7+) in ischemic (distal, left) and non-

820 ischemic (proximal, right) skeletal muscle specimens from a CLTI patient. PAX7+ (red). Laminin

821 (green). Hoechst (blue). CLTI patient number: N=7.

822 **C:** Quantification of (B) using data from 7 representative CLTI patients.

823 **D:** UMAP visualization of cells from skeletal muscle tissues of 10 healthy individuals and 3 CLTI

824 patients. Color key indicates the patient and condition (proximal versus distal). Total number of cells:

825 n=34,950.



826 **E:** Feature plot showing the expression of human macrophage marker C3AR1 in cluster 7 shown in Fig.  
827 5A.

828 **F:** The MuSCs/MPCs were plotted on a new UMAP space with increased resolution. Feature plots  
829 highlight the expression of the indicated genes in sub-clusters of MuSCs/MPCs.

830 **G:** Distribution of the MuSCs/MPCs obtained from the three CLTI patients in both distal (left) and  
831 proximal (right) conditions.

832

833 **Table S1: The differentially expressed genes in macrophage clusters 1 and 2 versus cluster 0**  
834 **shown in Figure 1E. Gene expression is quantified by scRNA-seq data. Related to Figure 1.**

835

836 **Table S2: The top 20 marker genes for each sub-cluster of macrophages shown in Figure S3A**  
837 **and S3B. Related to Figure 3 and Figure S3.**

838

839 **Table S3: The differentially expressed genes in macrophage purified from BALB/c versus**  
840 **C57BL6 mice at 3 days post HLI surgery. Gene expression is quantified by bulk RNA-seq.**  
841 **Related to Figure 3.**

842

843 **Table 4. List of PCR primers used in this study.**

844

845 **Table S4. List of PCR primers used in this study.**

| <i>Primer name</i>       | <i>Primer sequence and modifications (/.../)</i>        |
|--------------------------|---------------------------------------------------------|
| dT30VN-ME-A              | TCGTCGGCAGCGTCAGATGTGTATAAGAGACAGNNNNV/T30/VN           |
| NotI-TSO                 | /5isodG/GCGGCCGCAAGCAGTGGTATCAACGCAGAGTACATrGrGrG       |
| IS PCR                   | AAGCAGTGGTATCAACGCAGAGT                                 |
| Tn5ME-A-aHiC             | AGCGTCAGATGTGTATAAGAGACAG                               |
| Tn5ME-A for Tn5 adapter  | TCGTCGGCAGCGTCAGATGTGTATAAGAGACAG                       |
| Tn5ME-B for Tn5 adapter  | GTCTCGTGGGCTCGGAGATGTGTATAAGAGACAG                      |
| Tn5MErev for Tn5 adapter | /5Phos/CTGTCTCTTATACACATCT                              |
| Nextera-PCR-i5-#         | AATGATACGGCGACCACCGAGATCTACACNNNNNNNNTCGTCGGCA<br>GCGTC |
| Nextera-PCR-i7-#         | CAAGCAGAAGACGGCATACGAGATNNNNNNNNGTCTCGTGGGCTCG<br>G     |

846

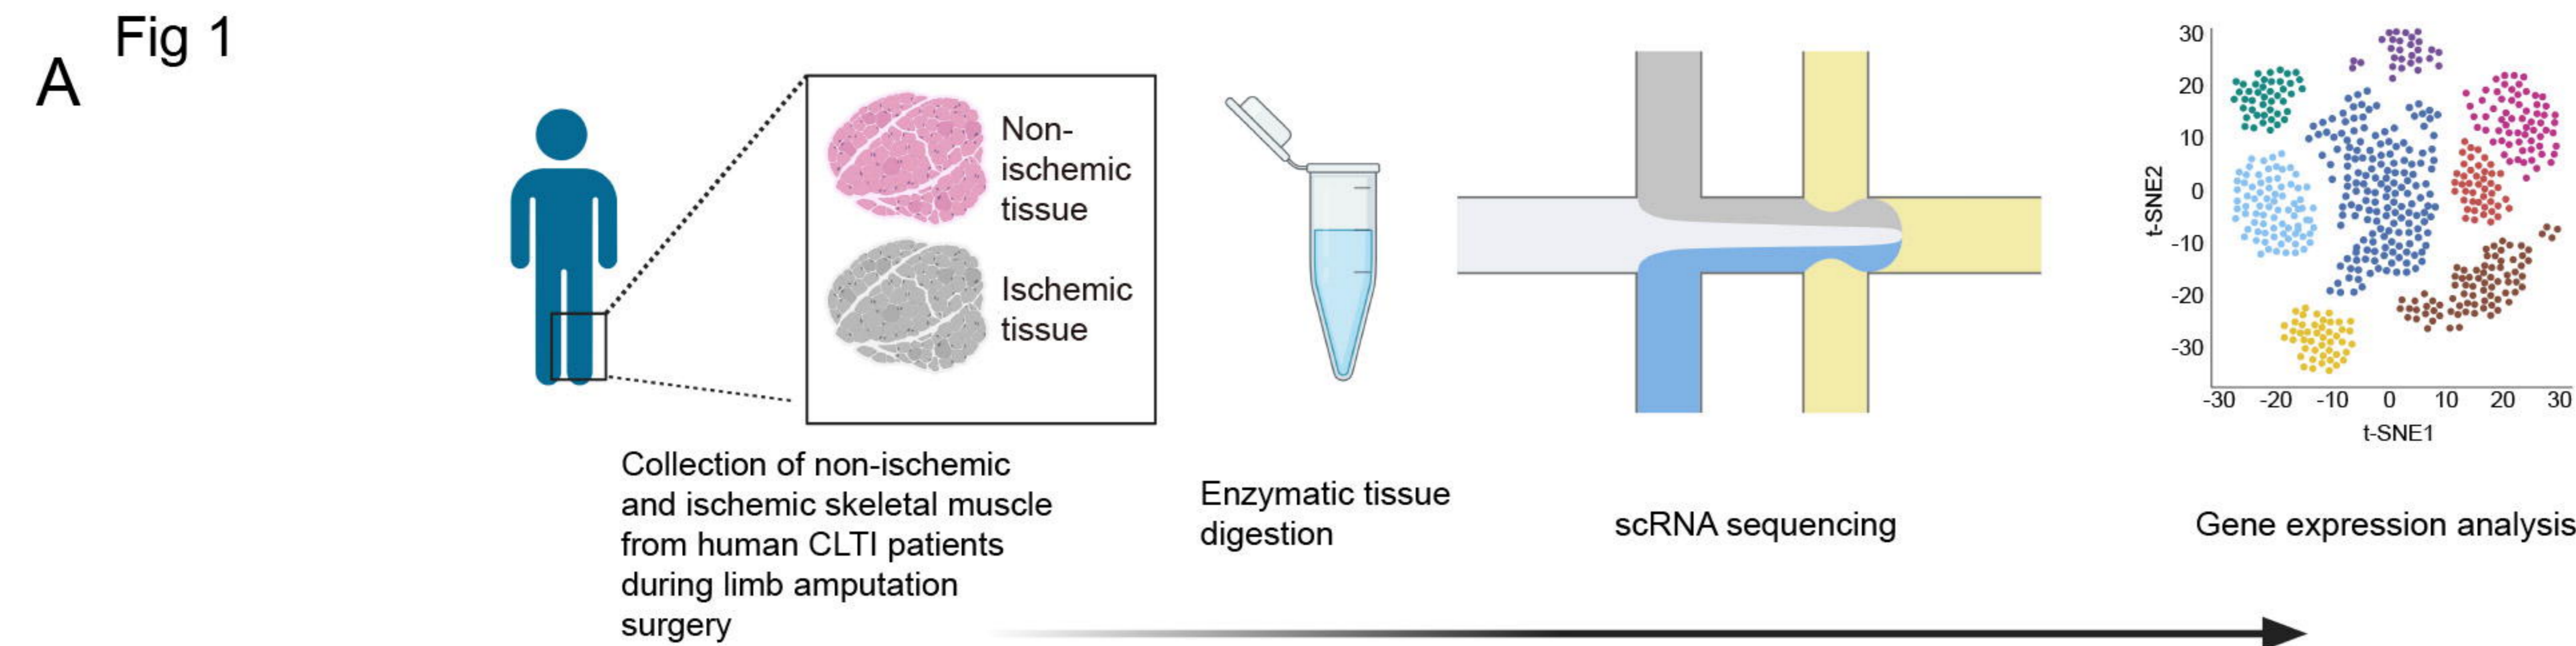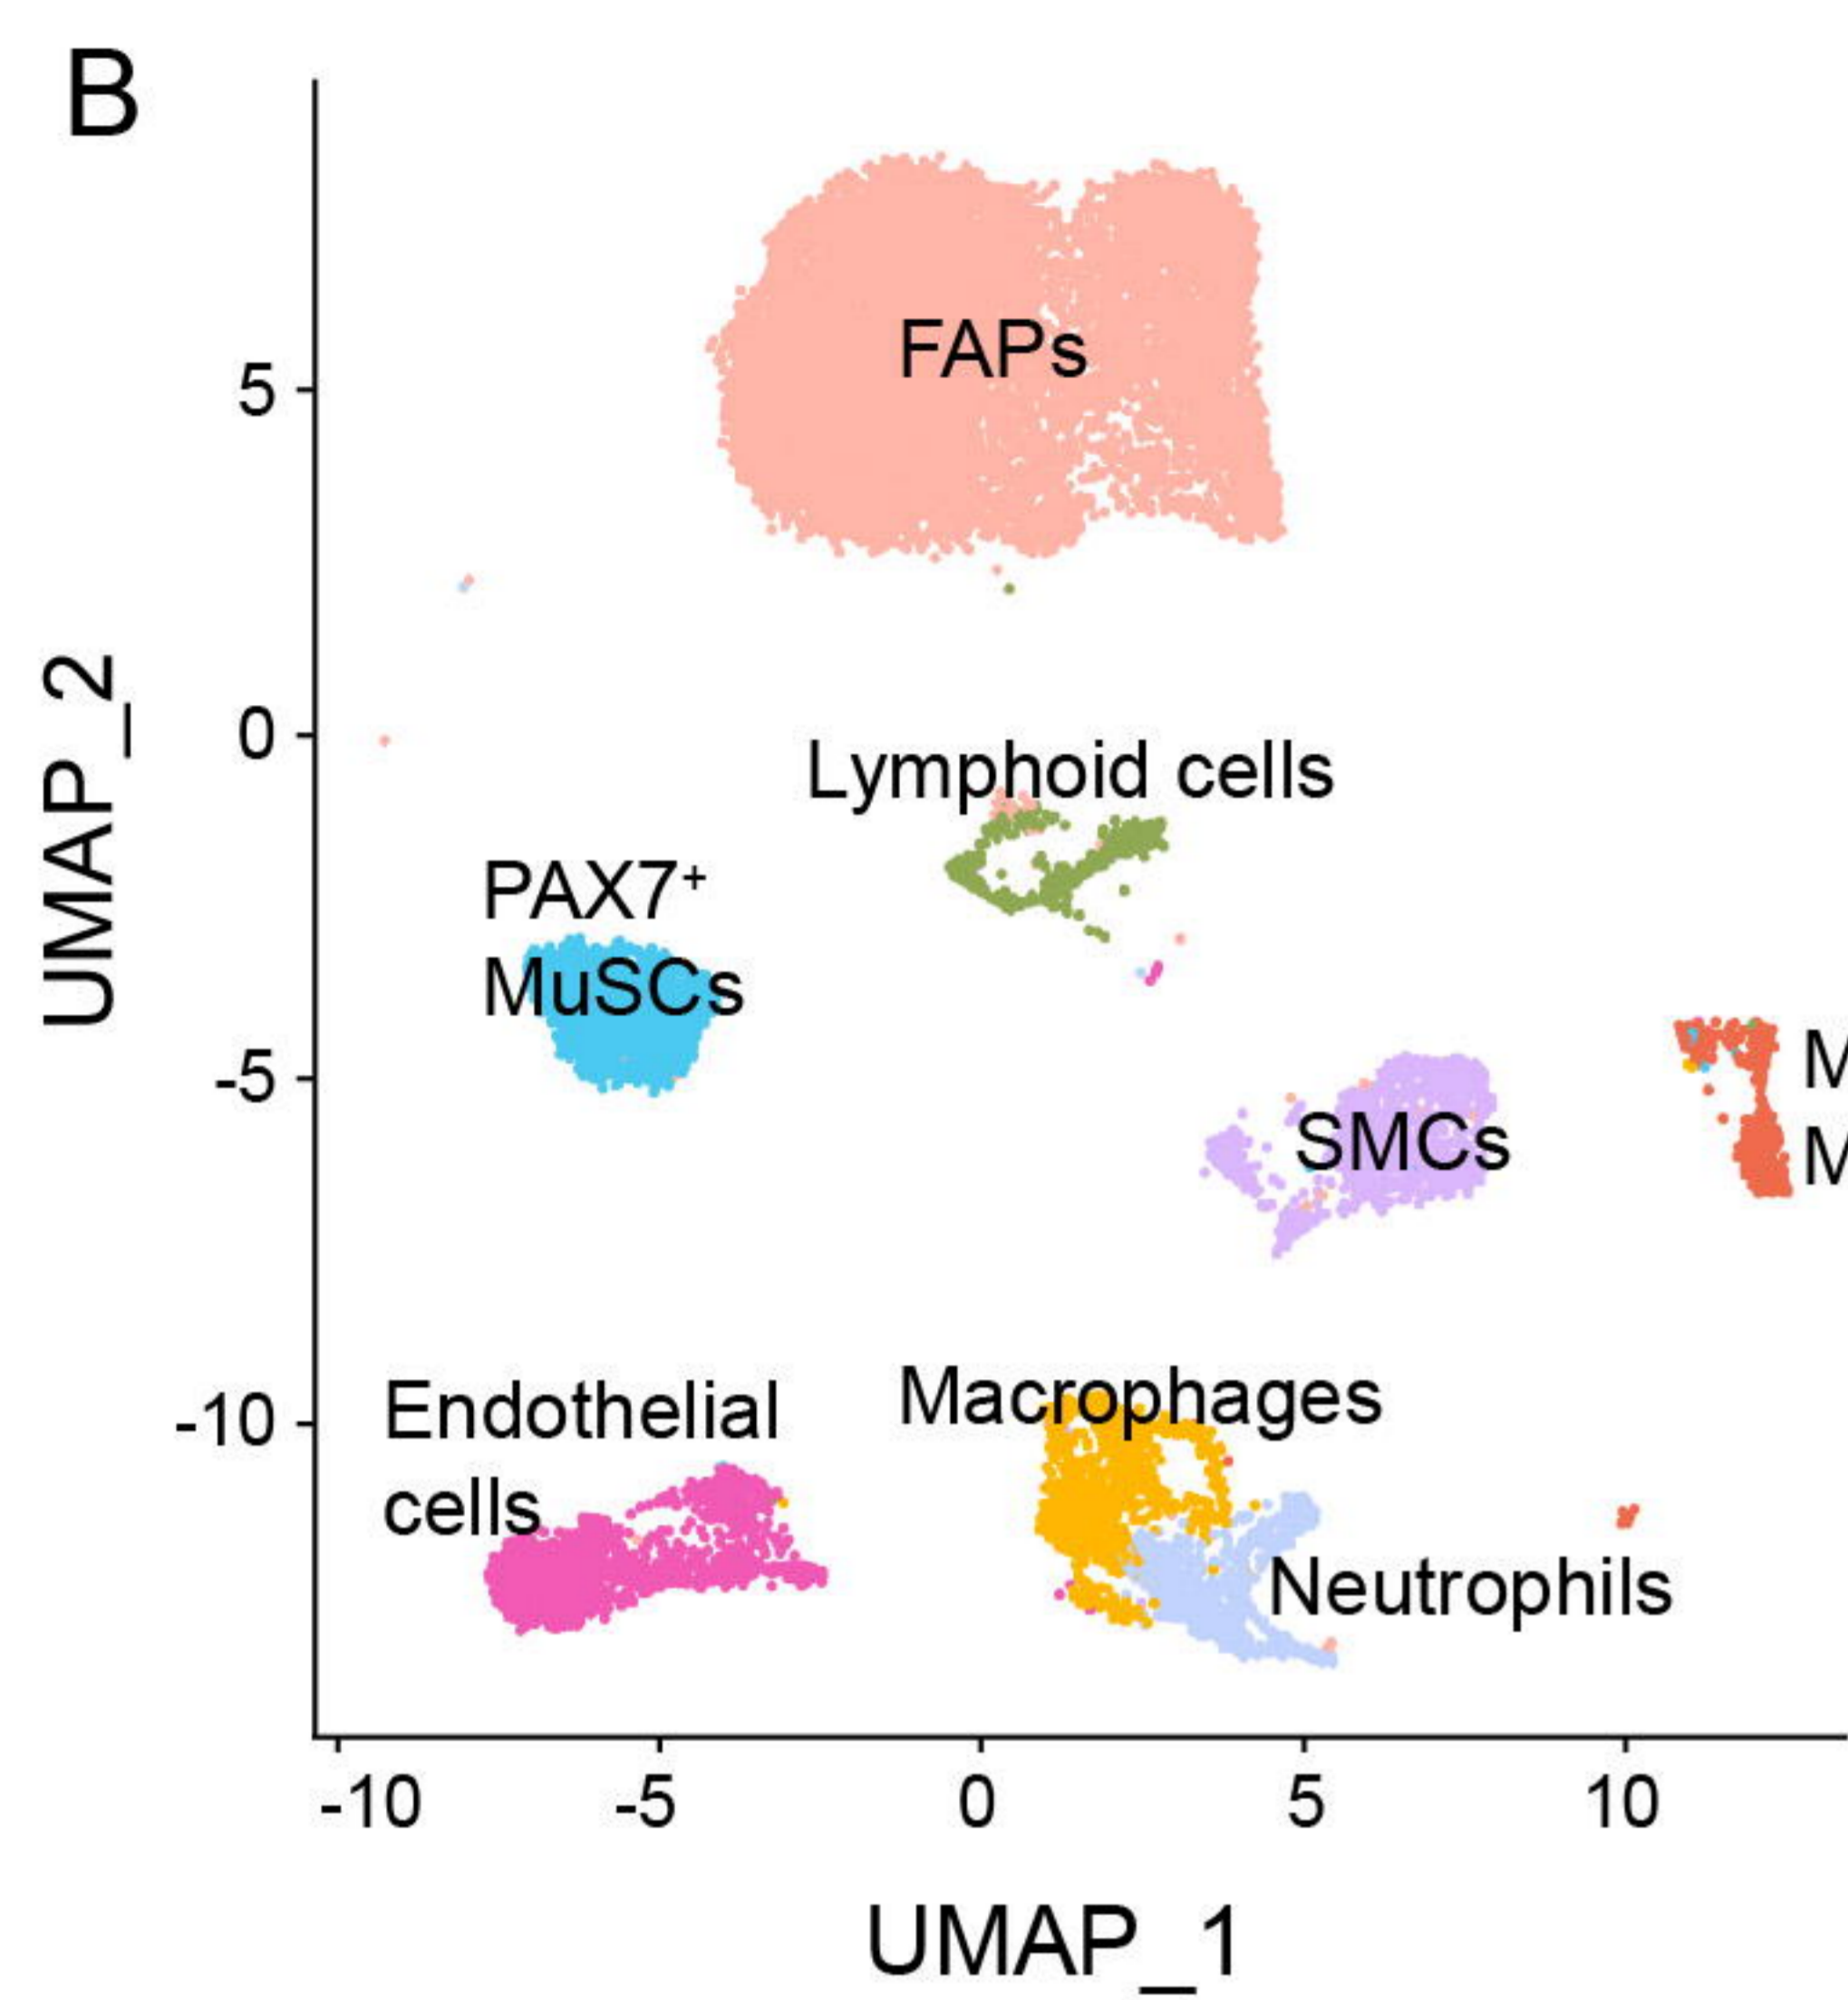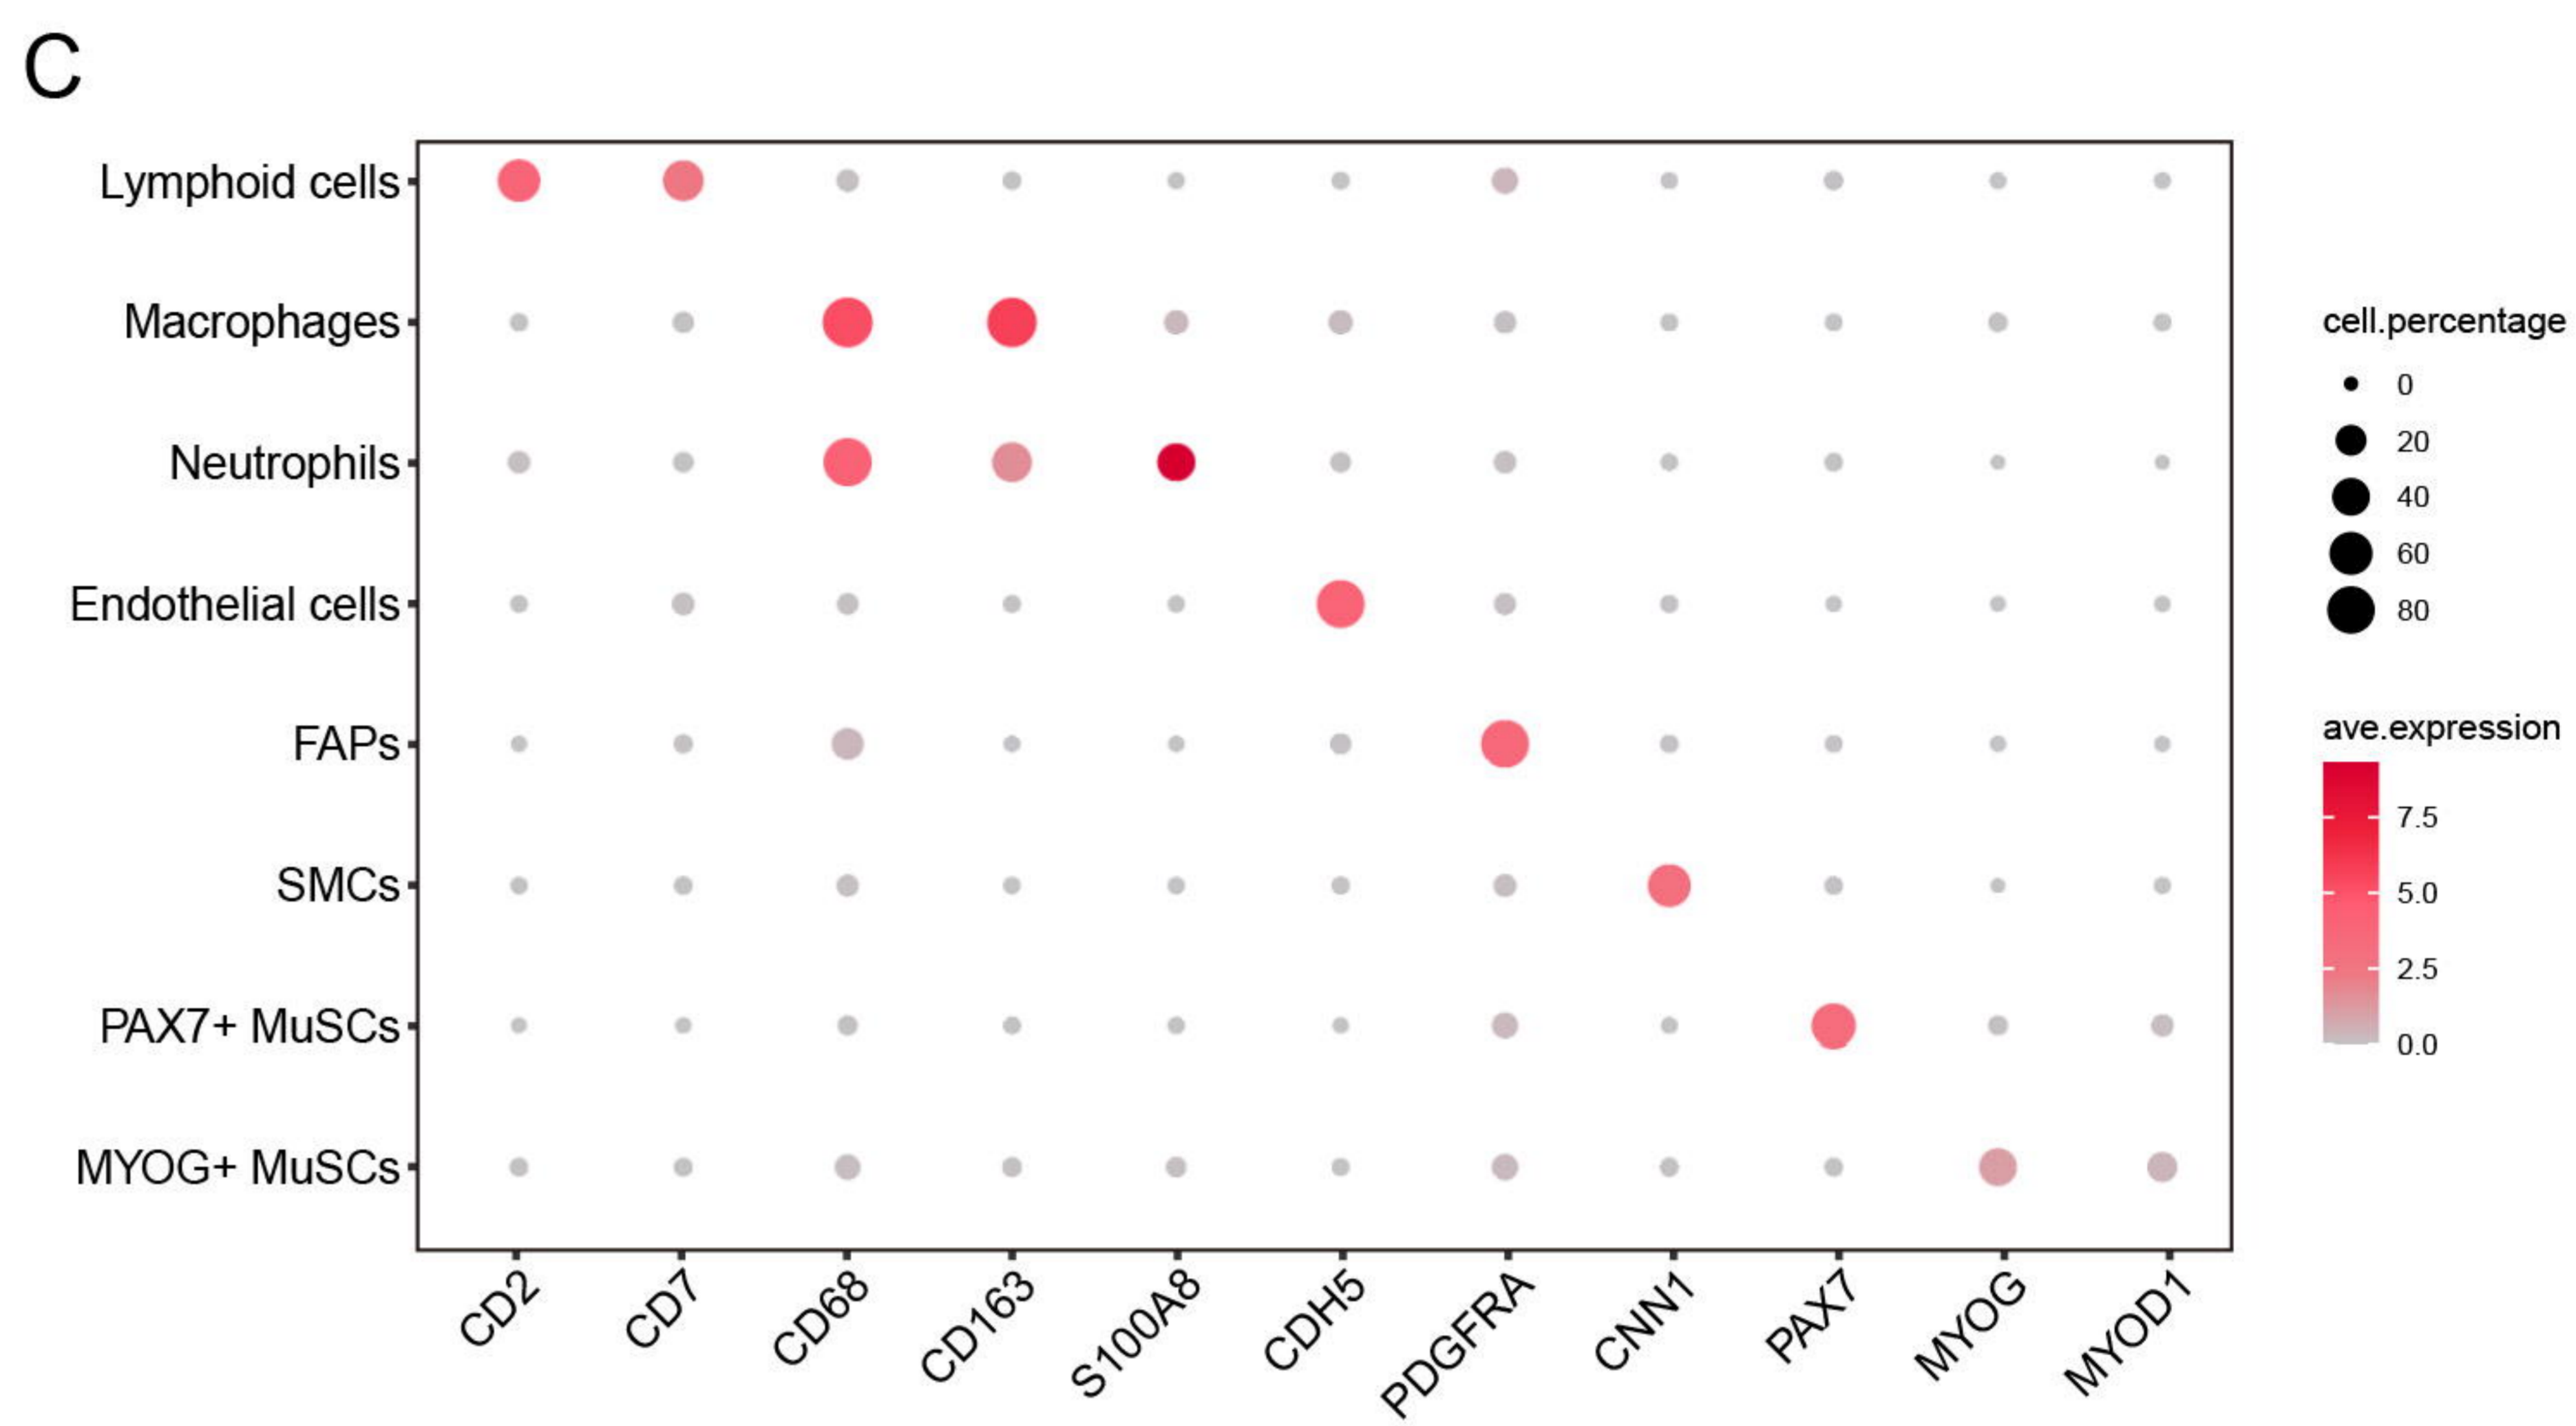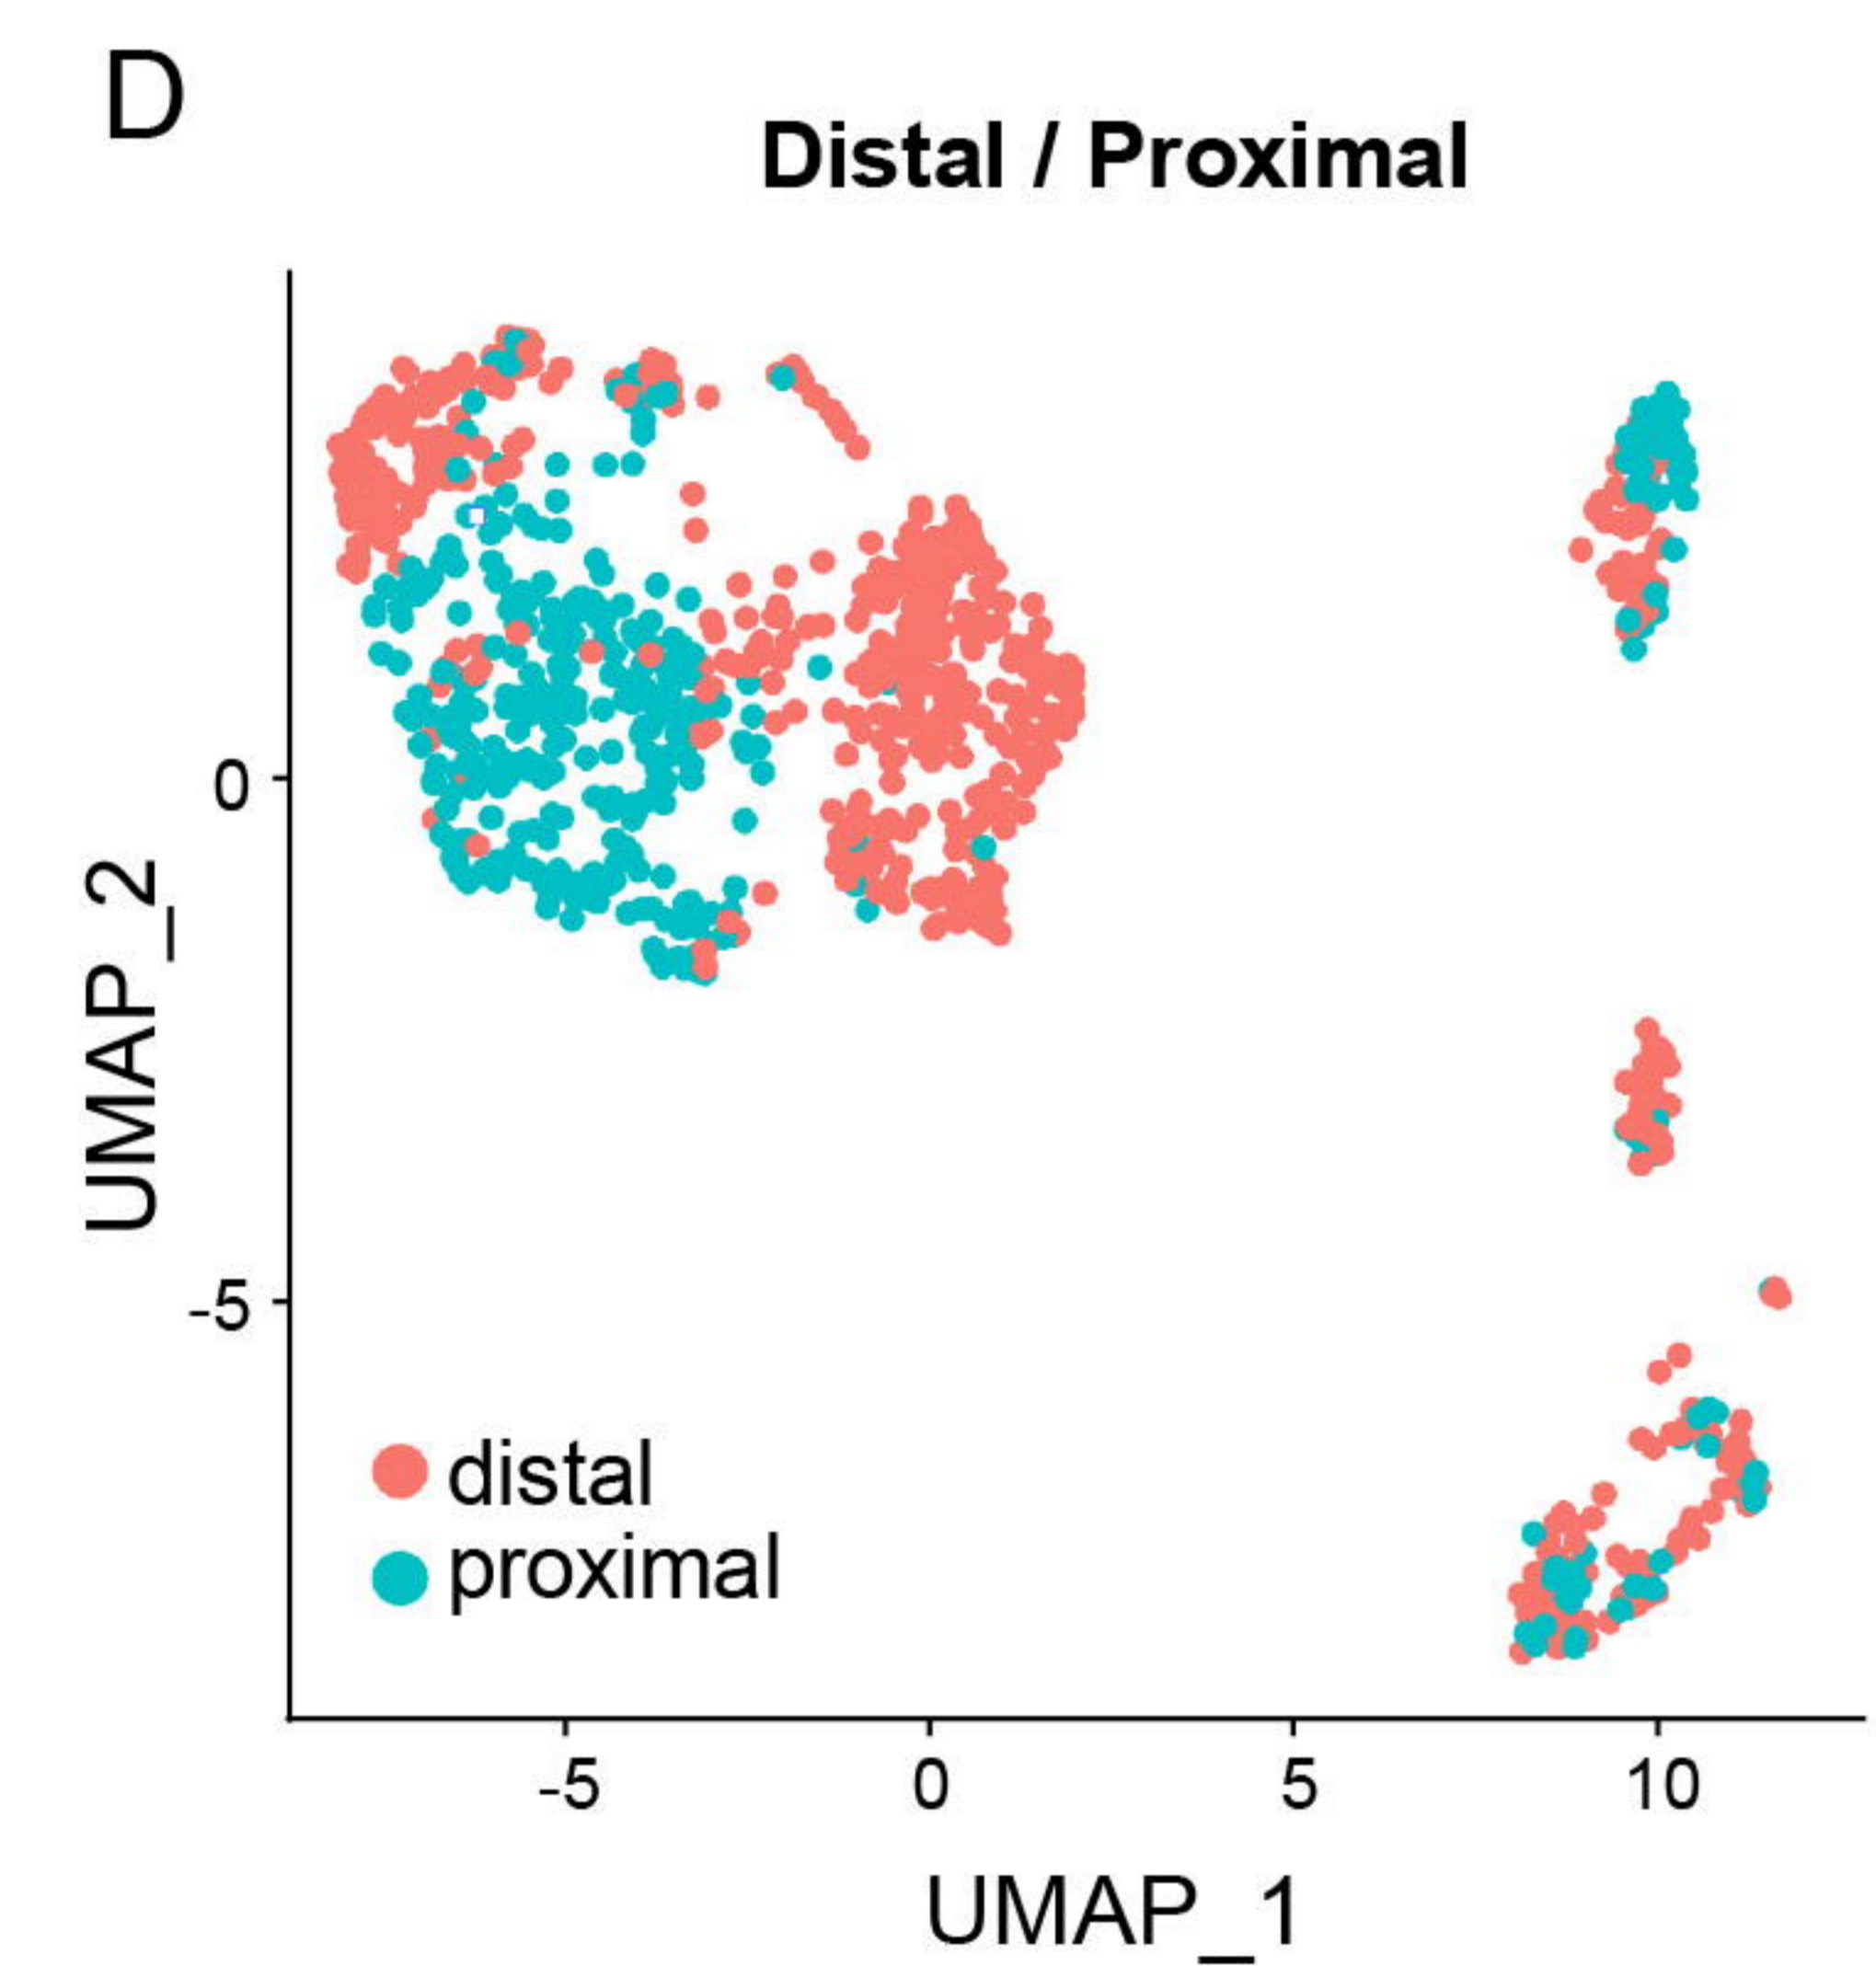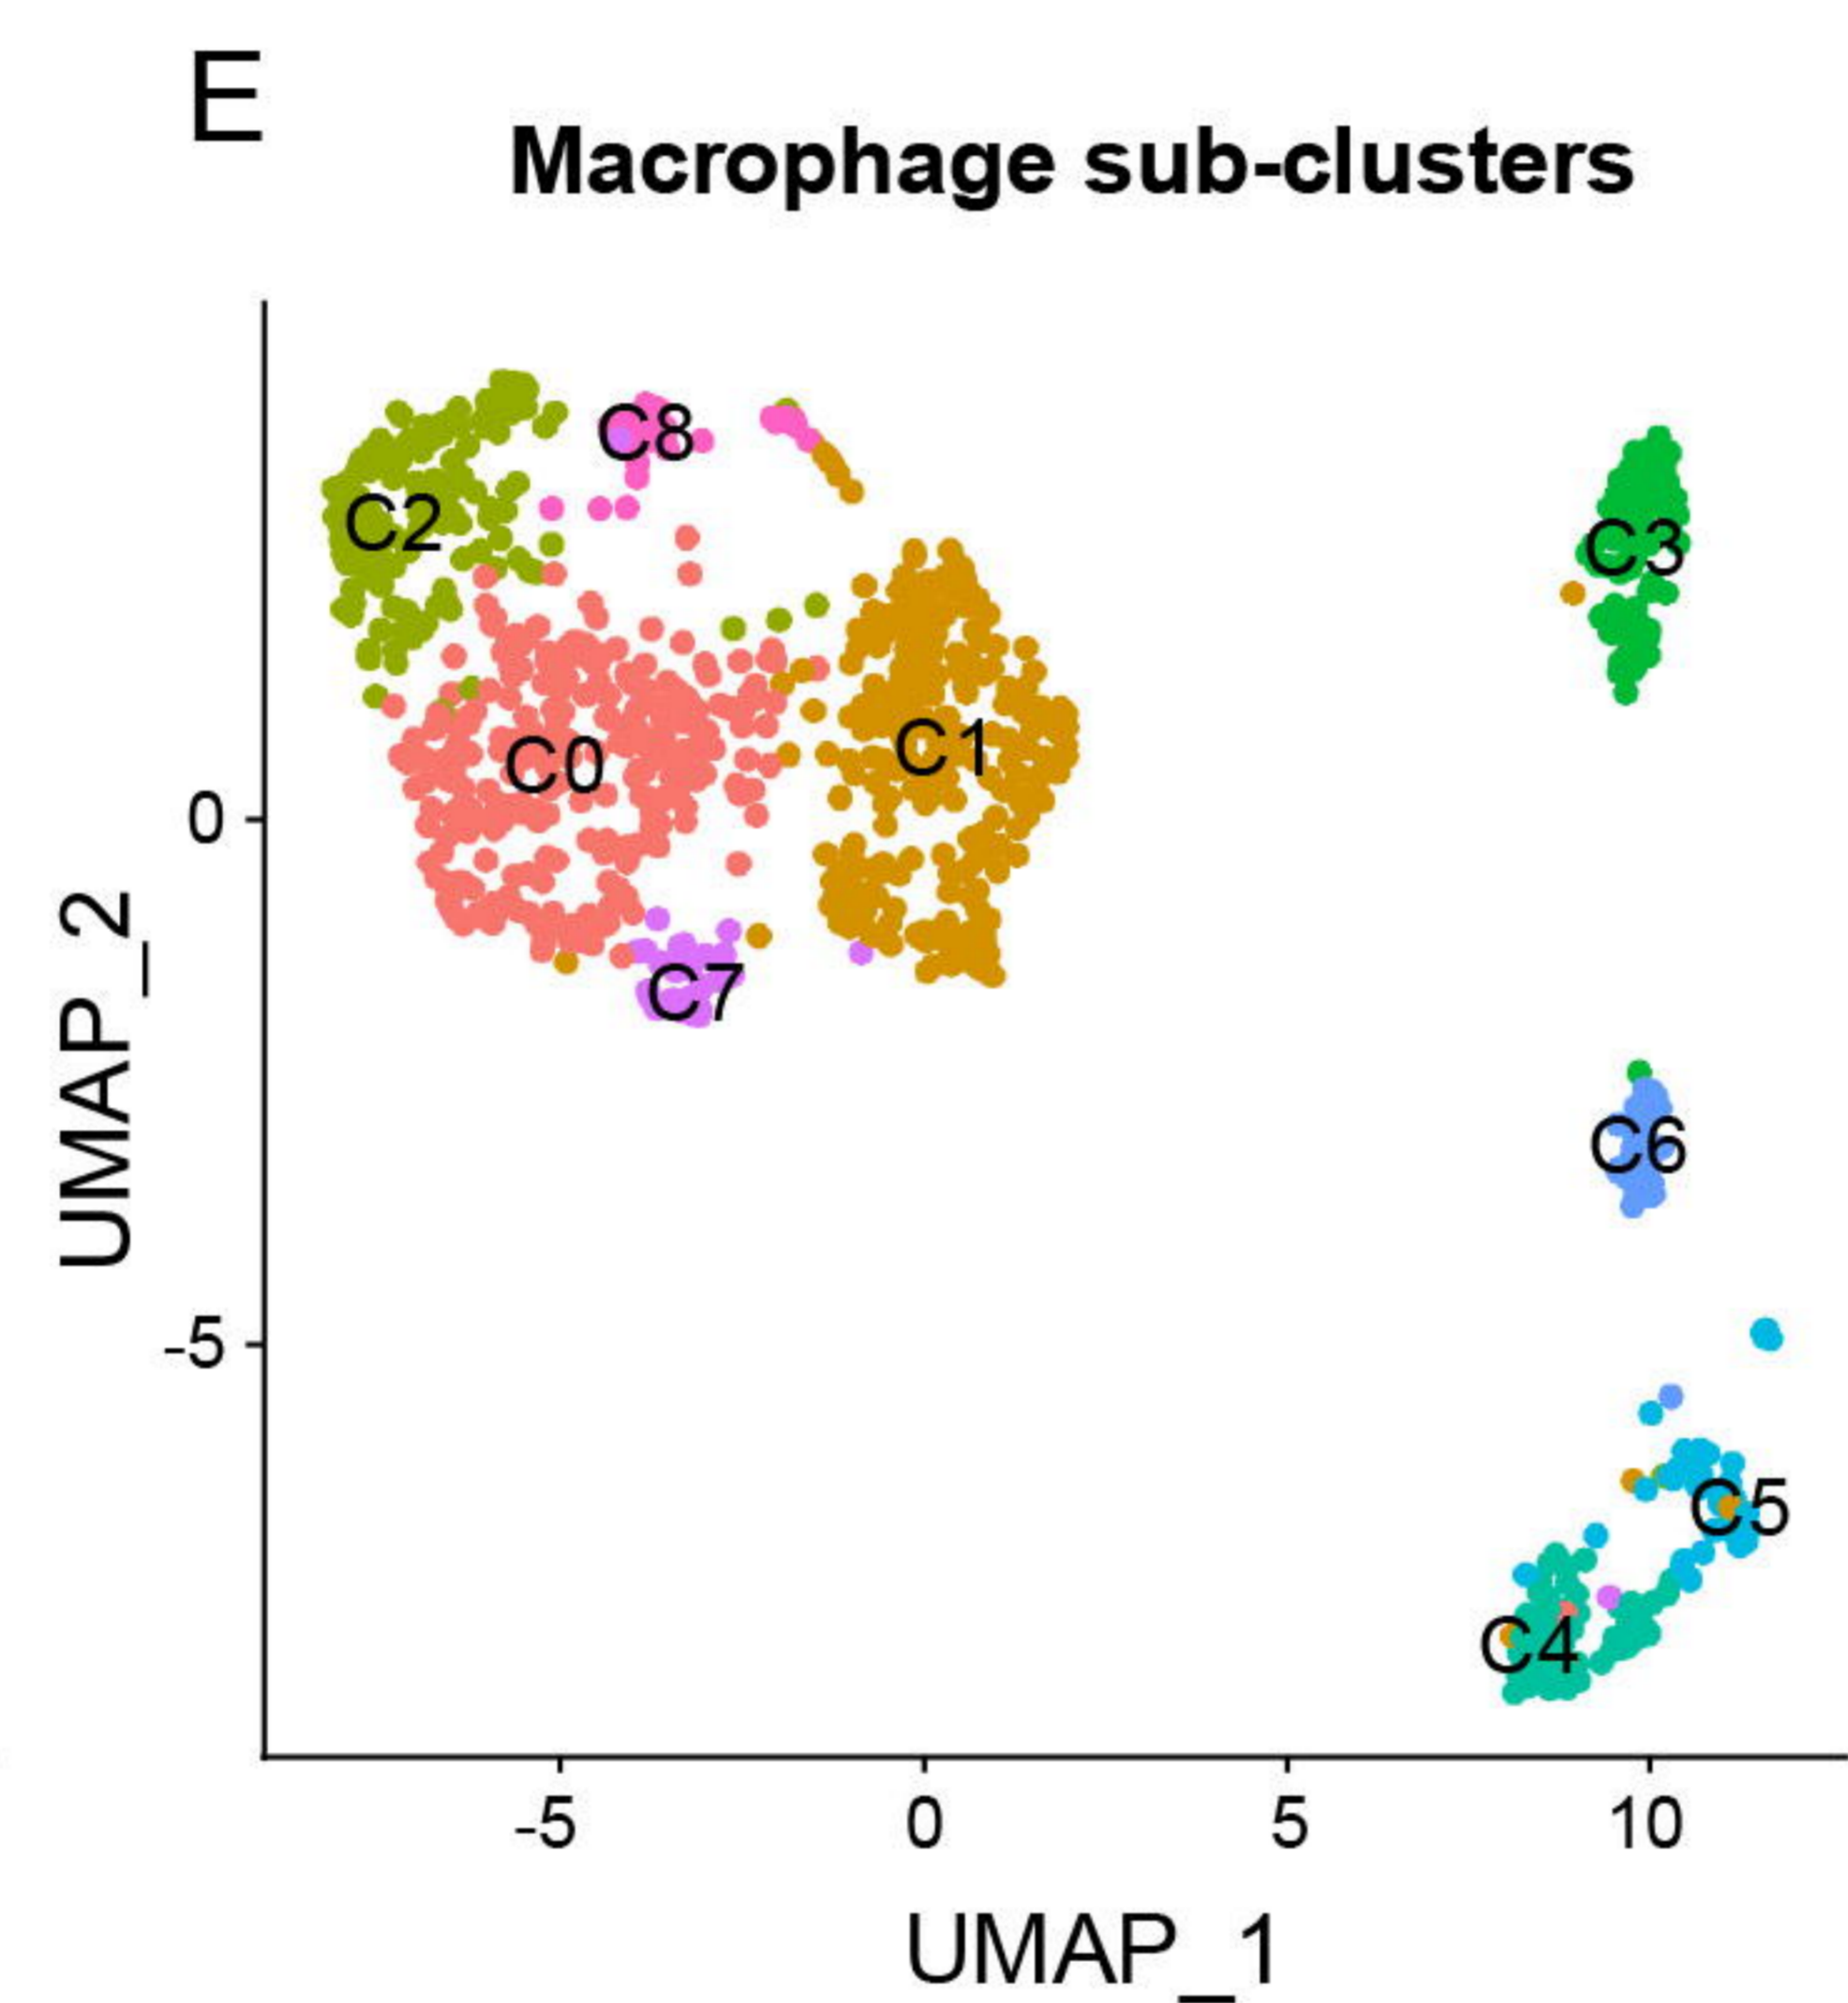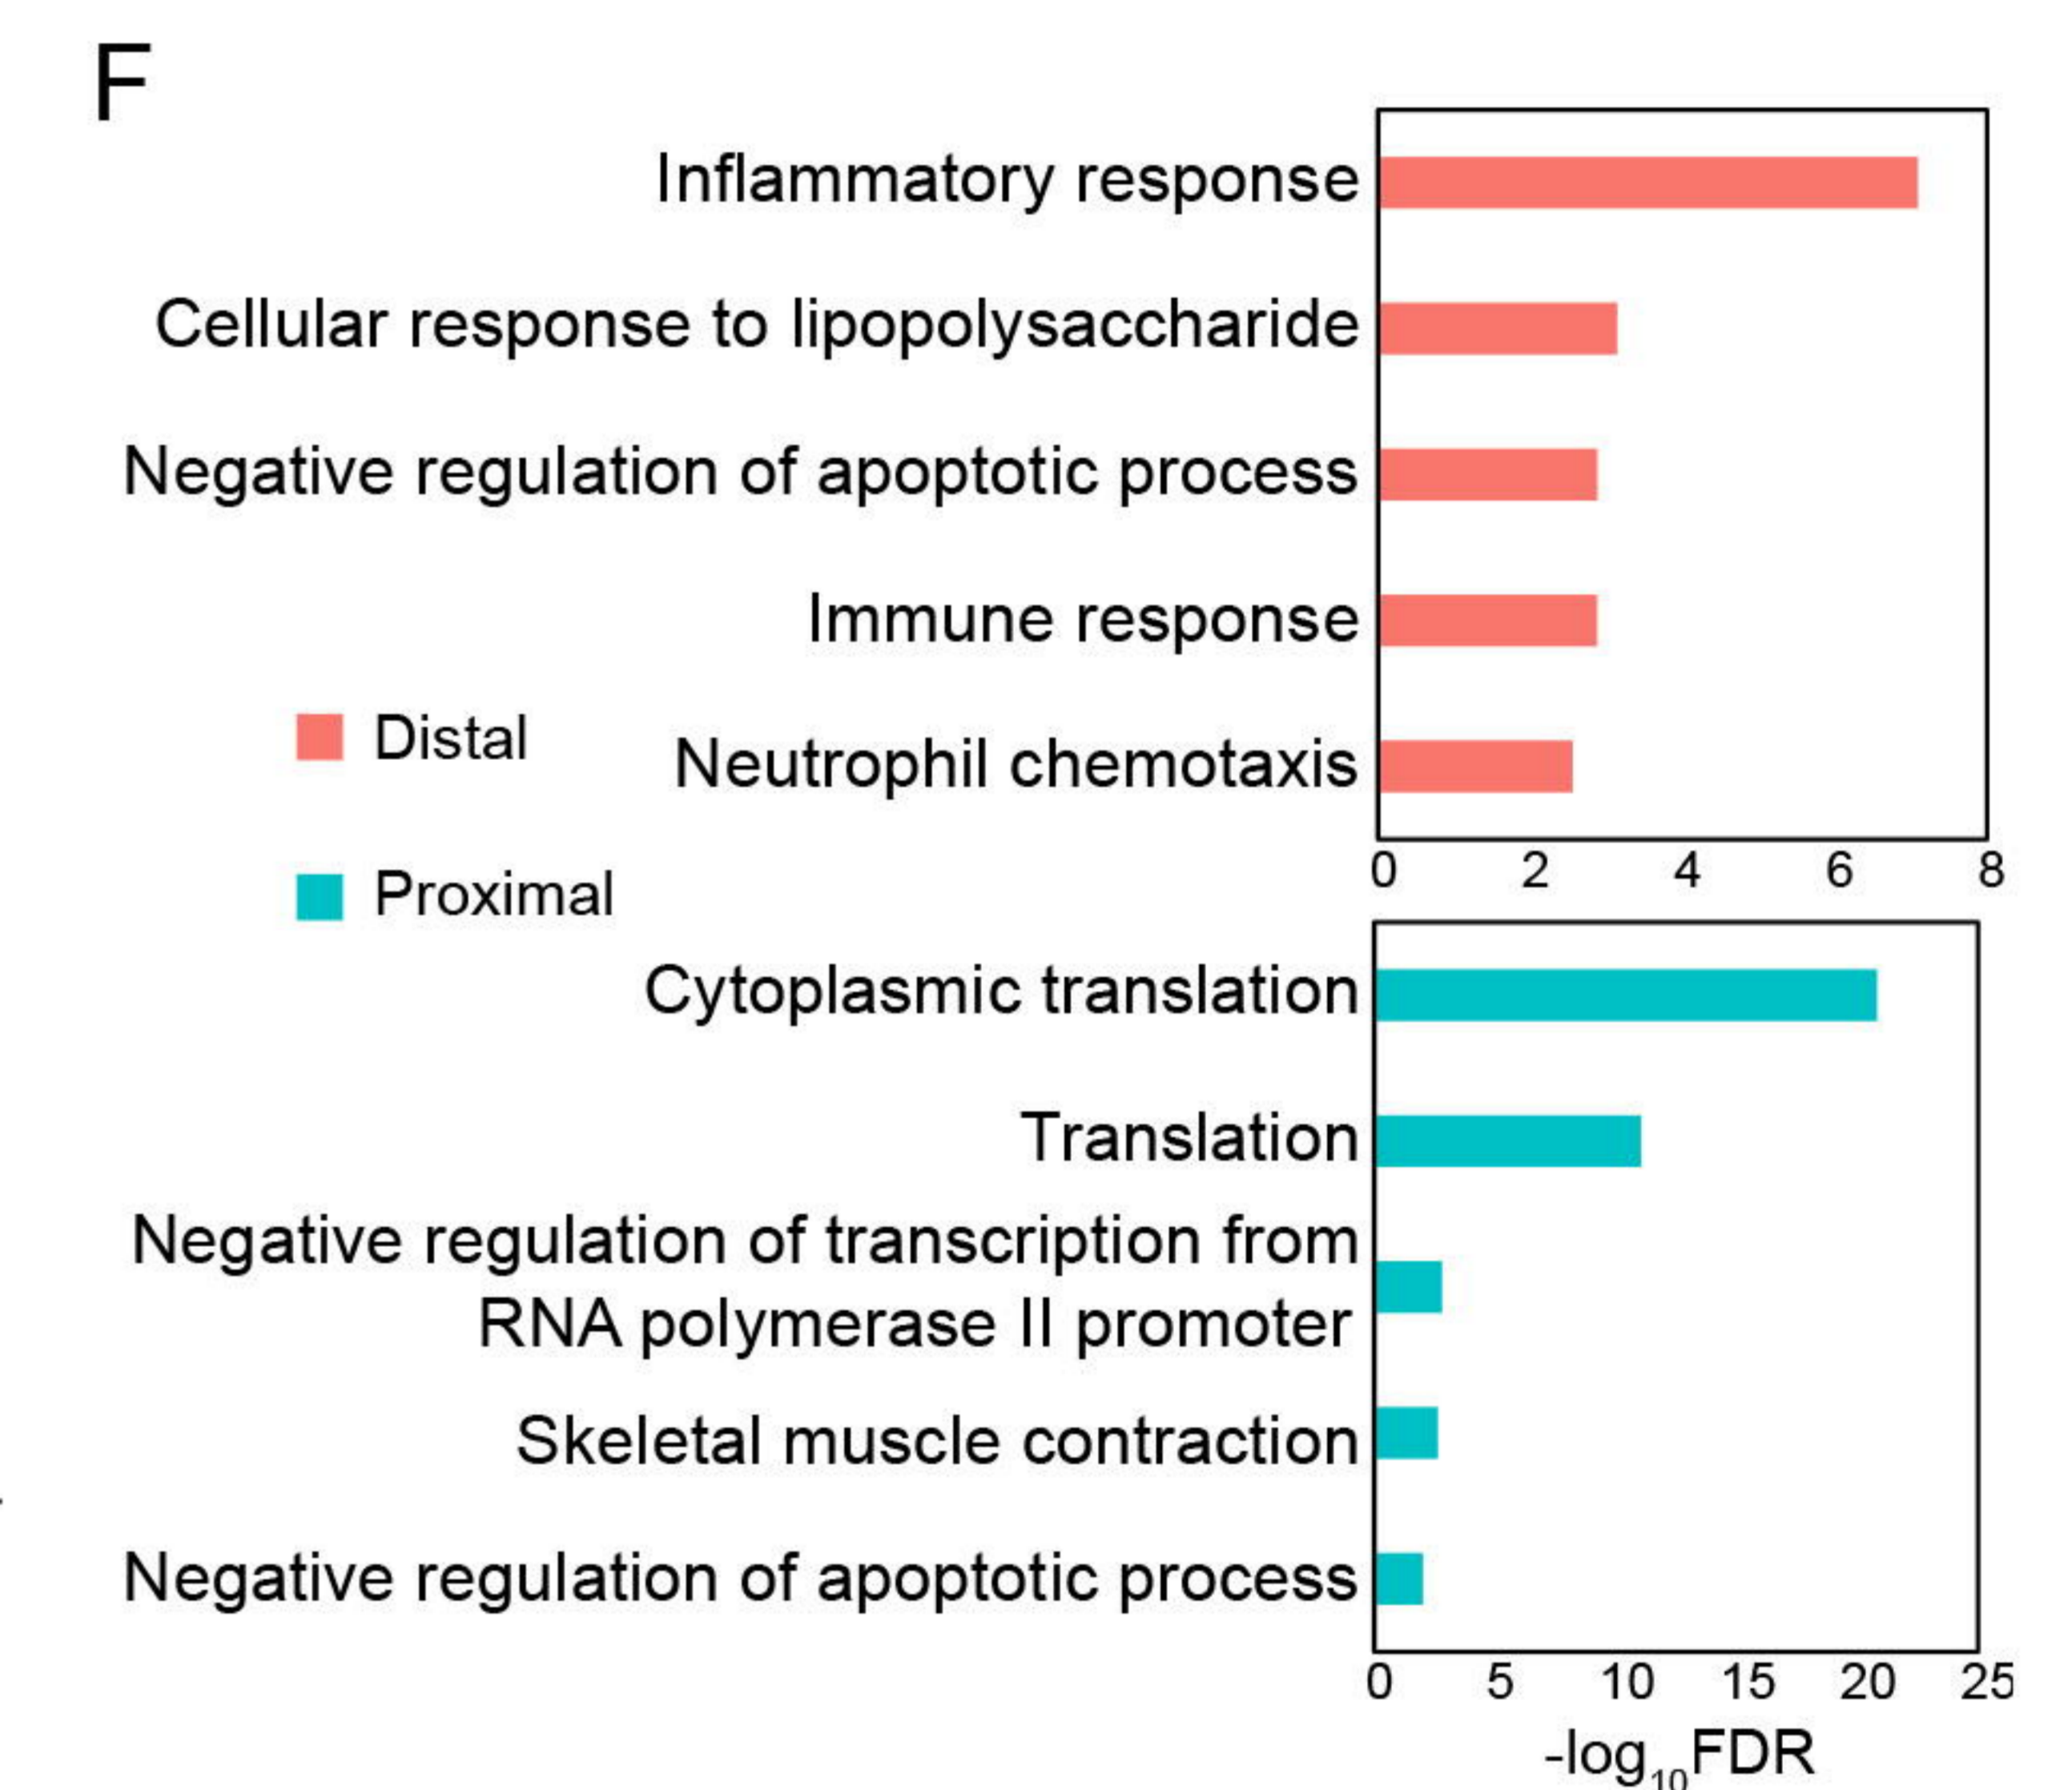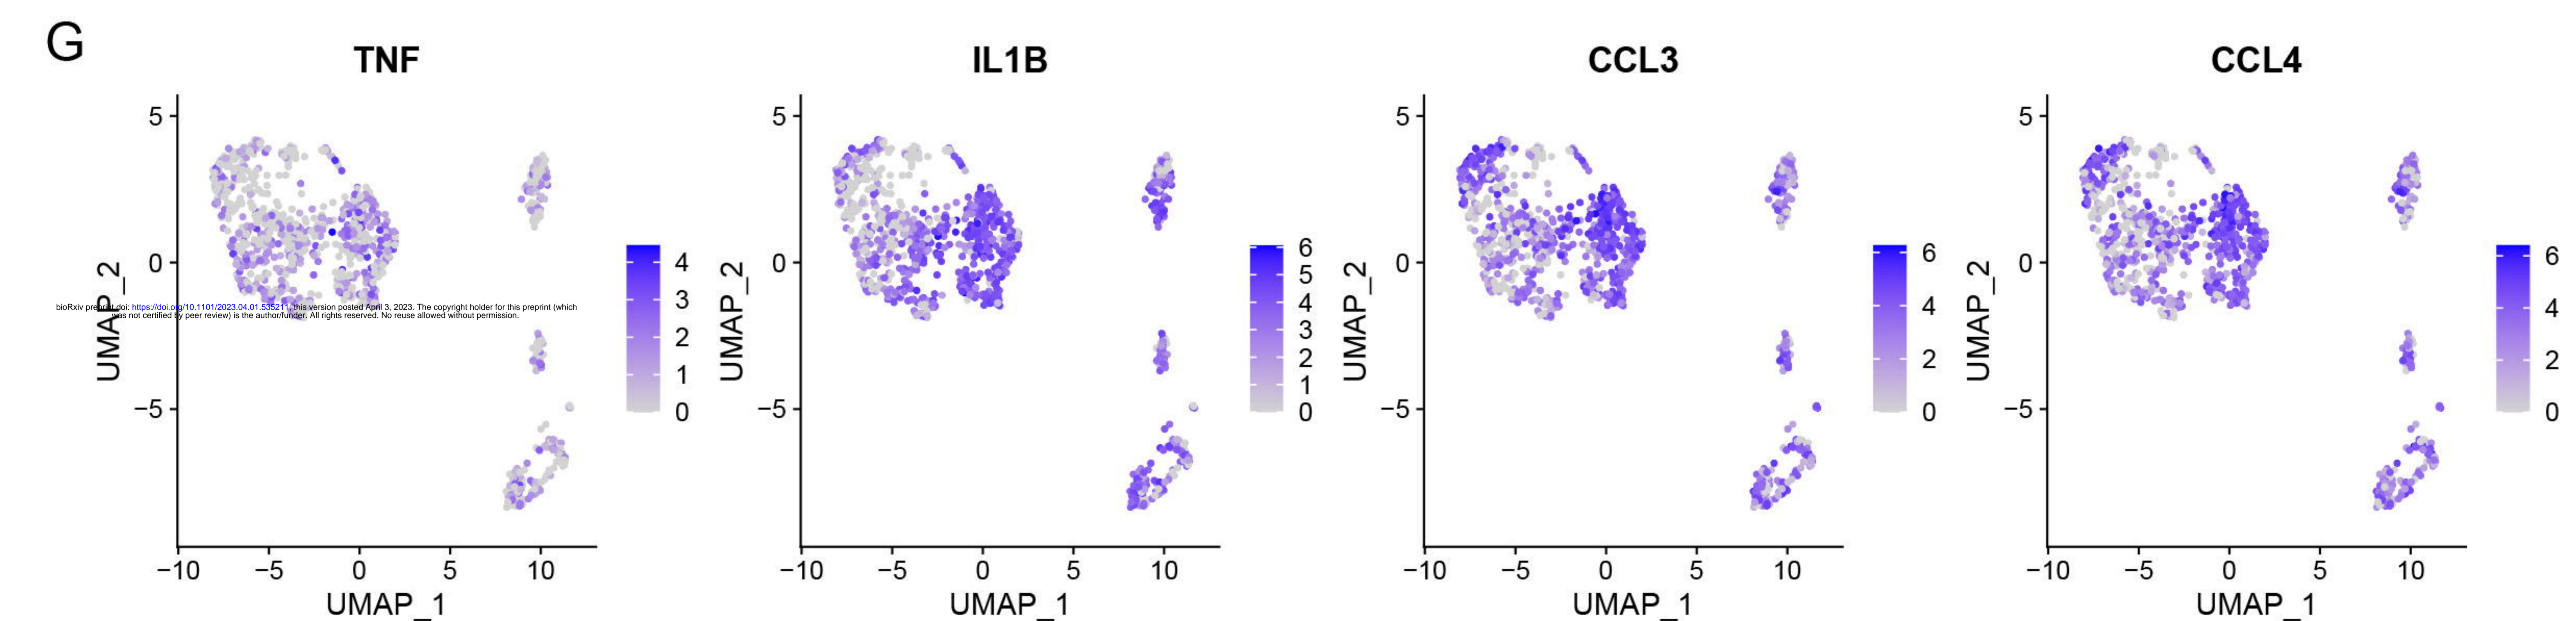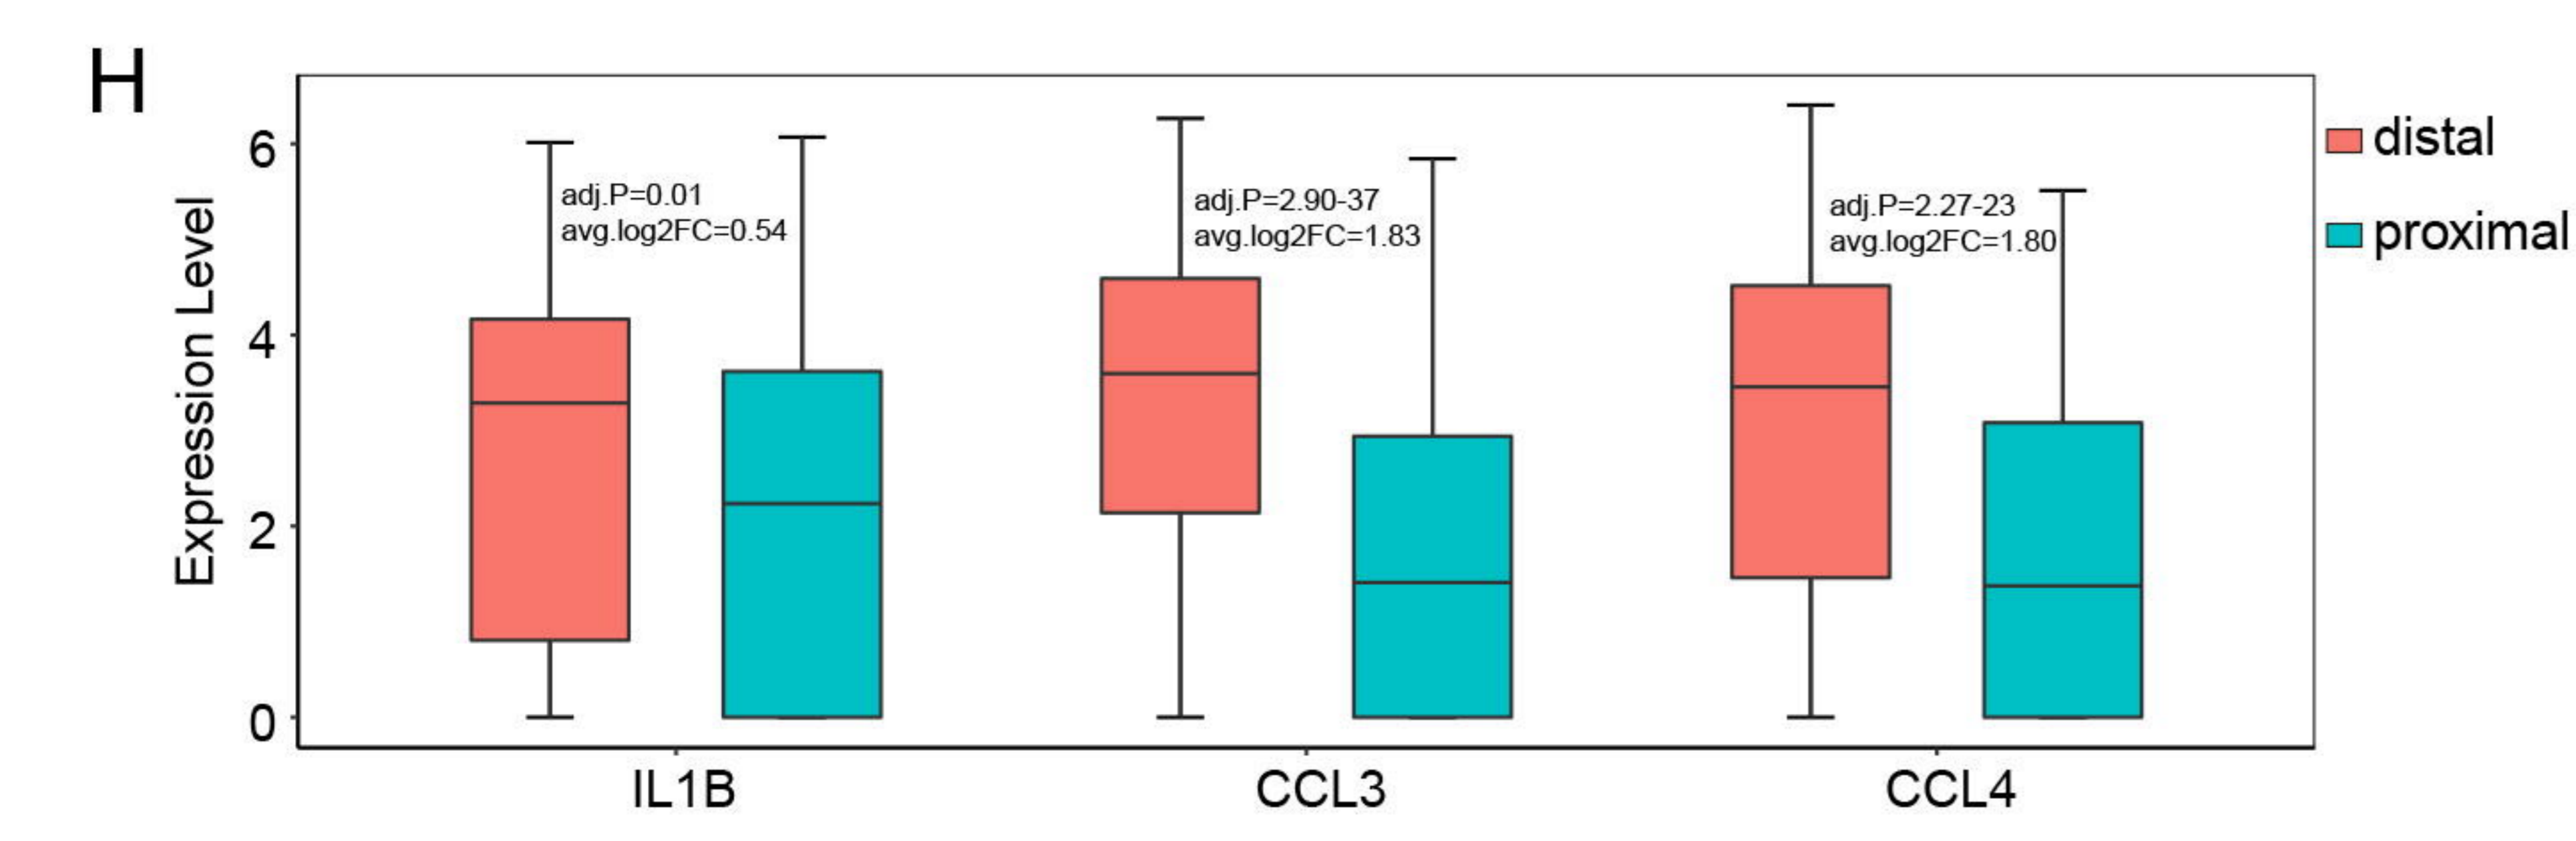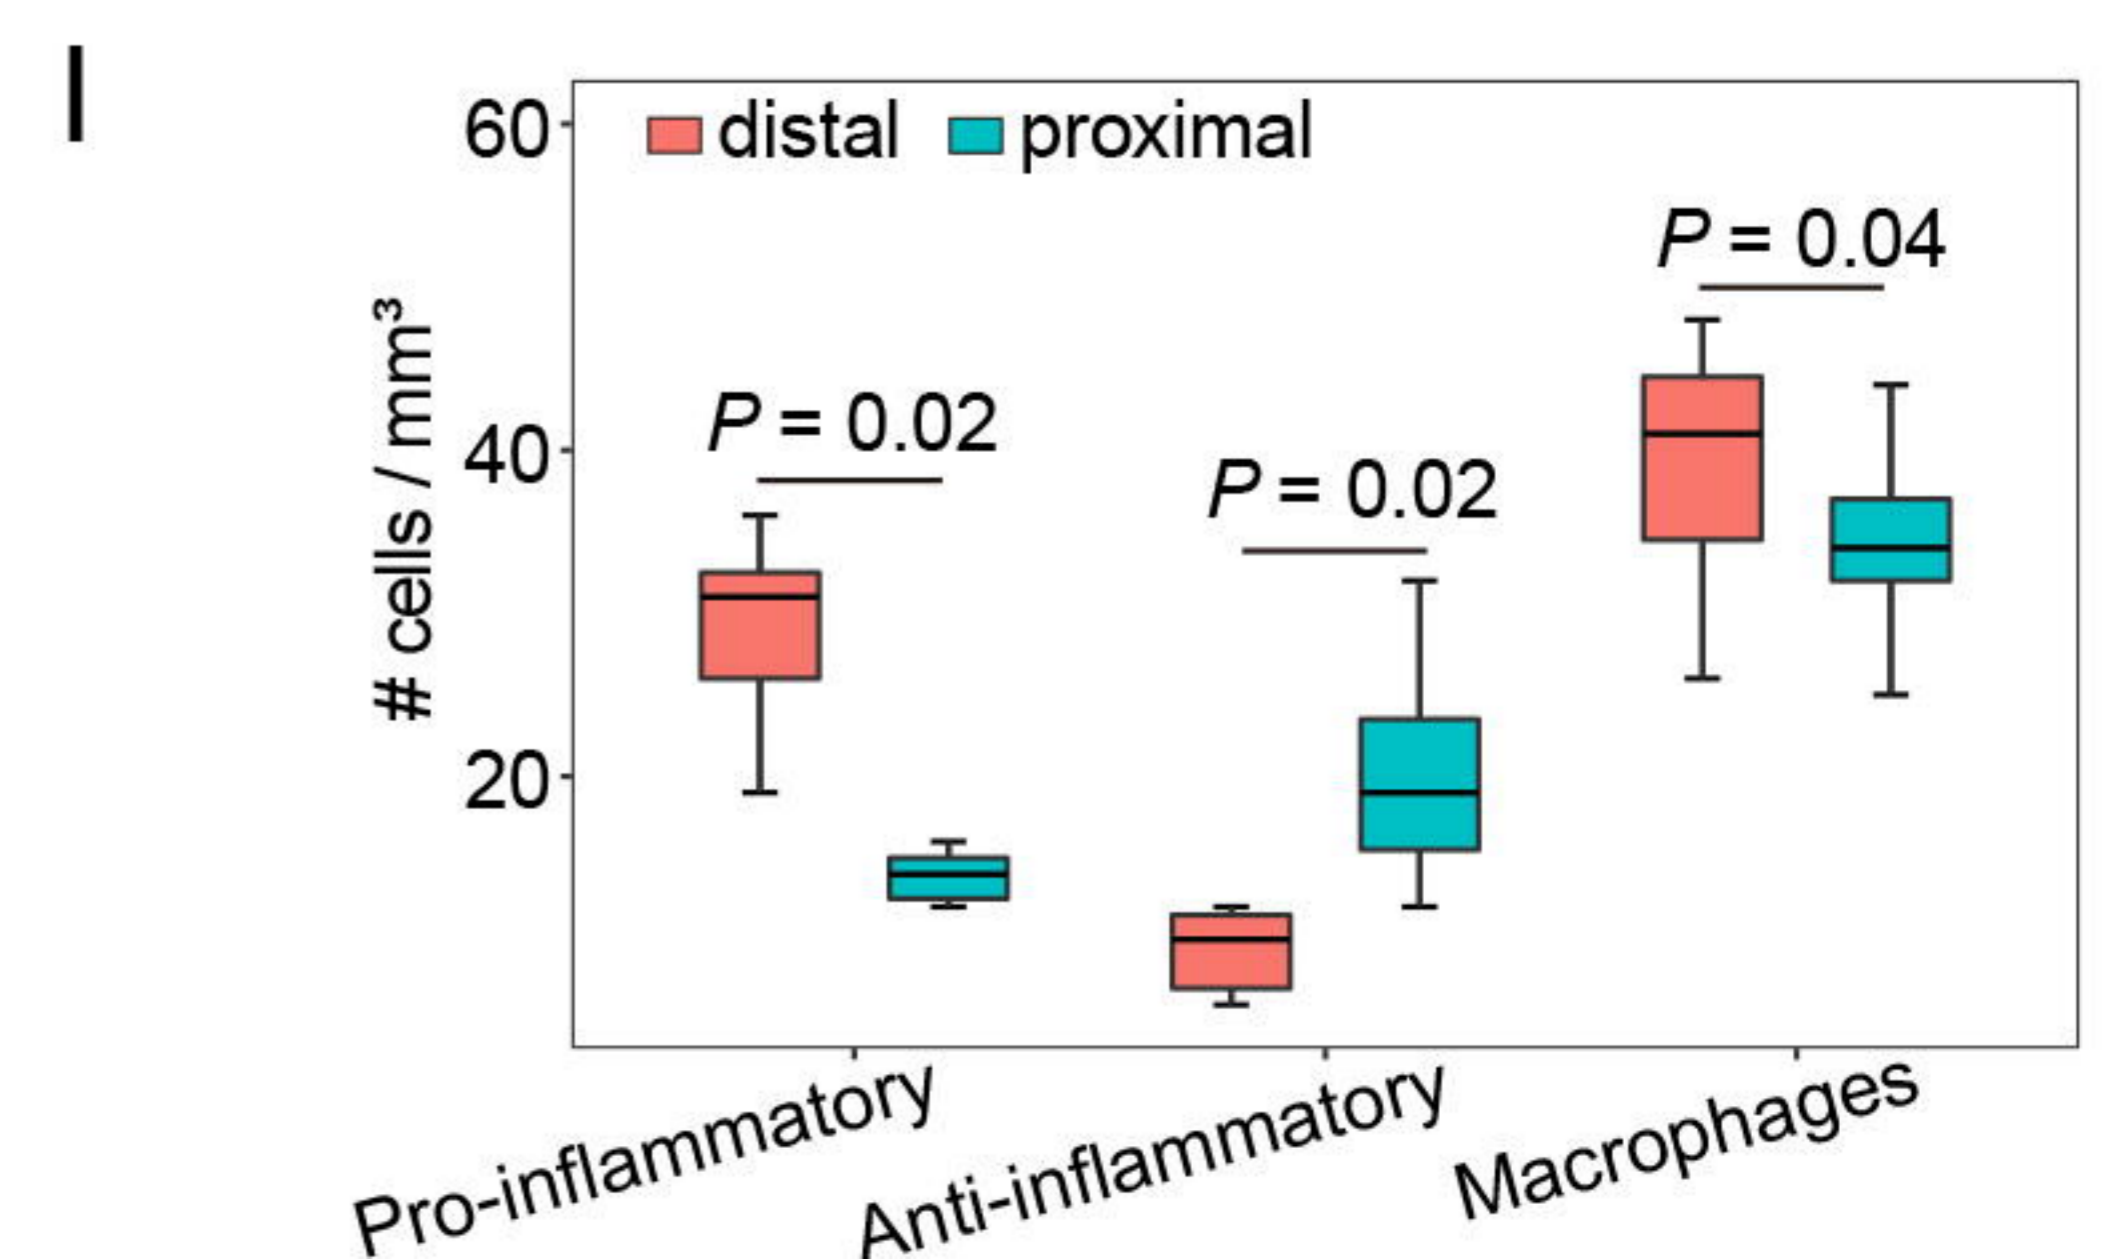

Fig 2

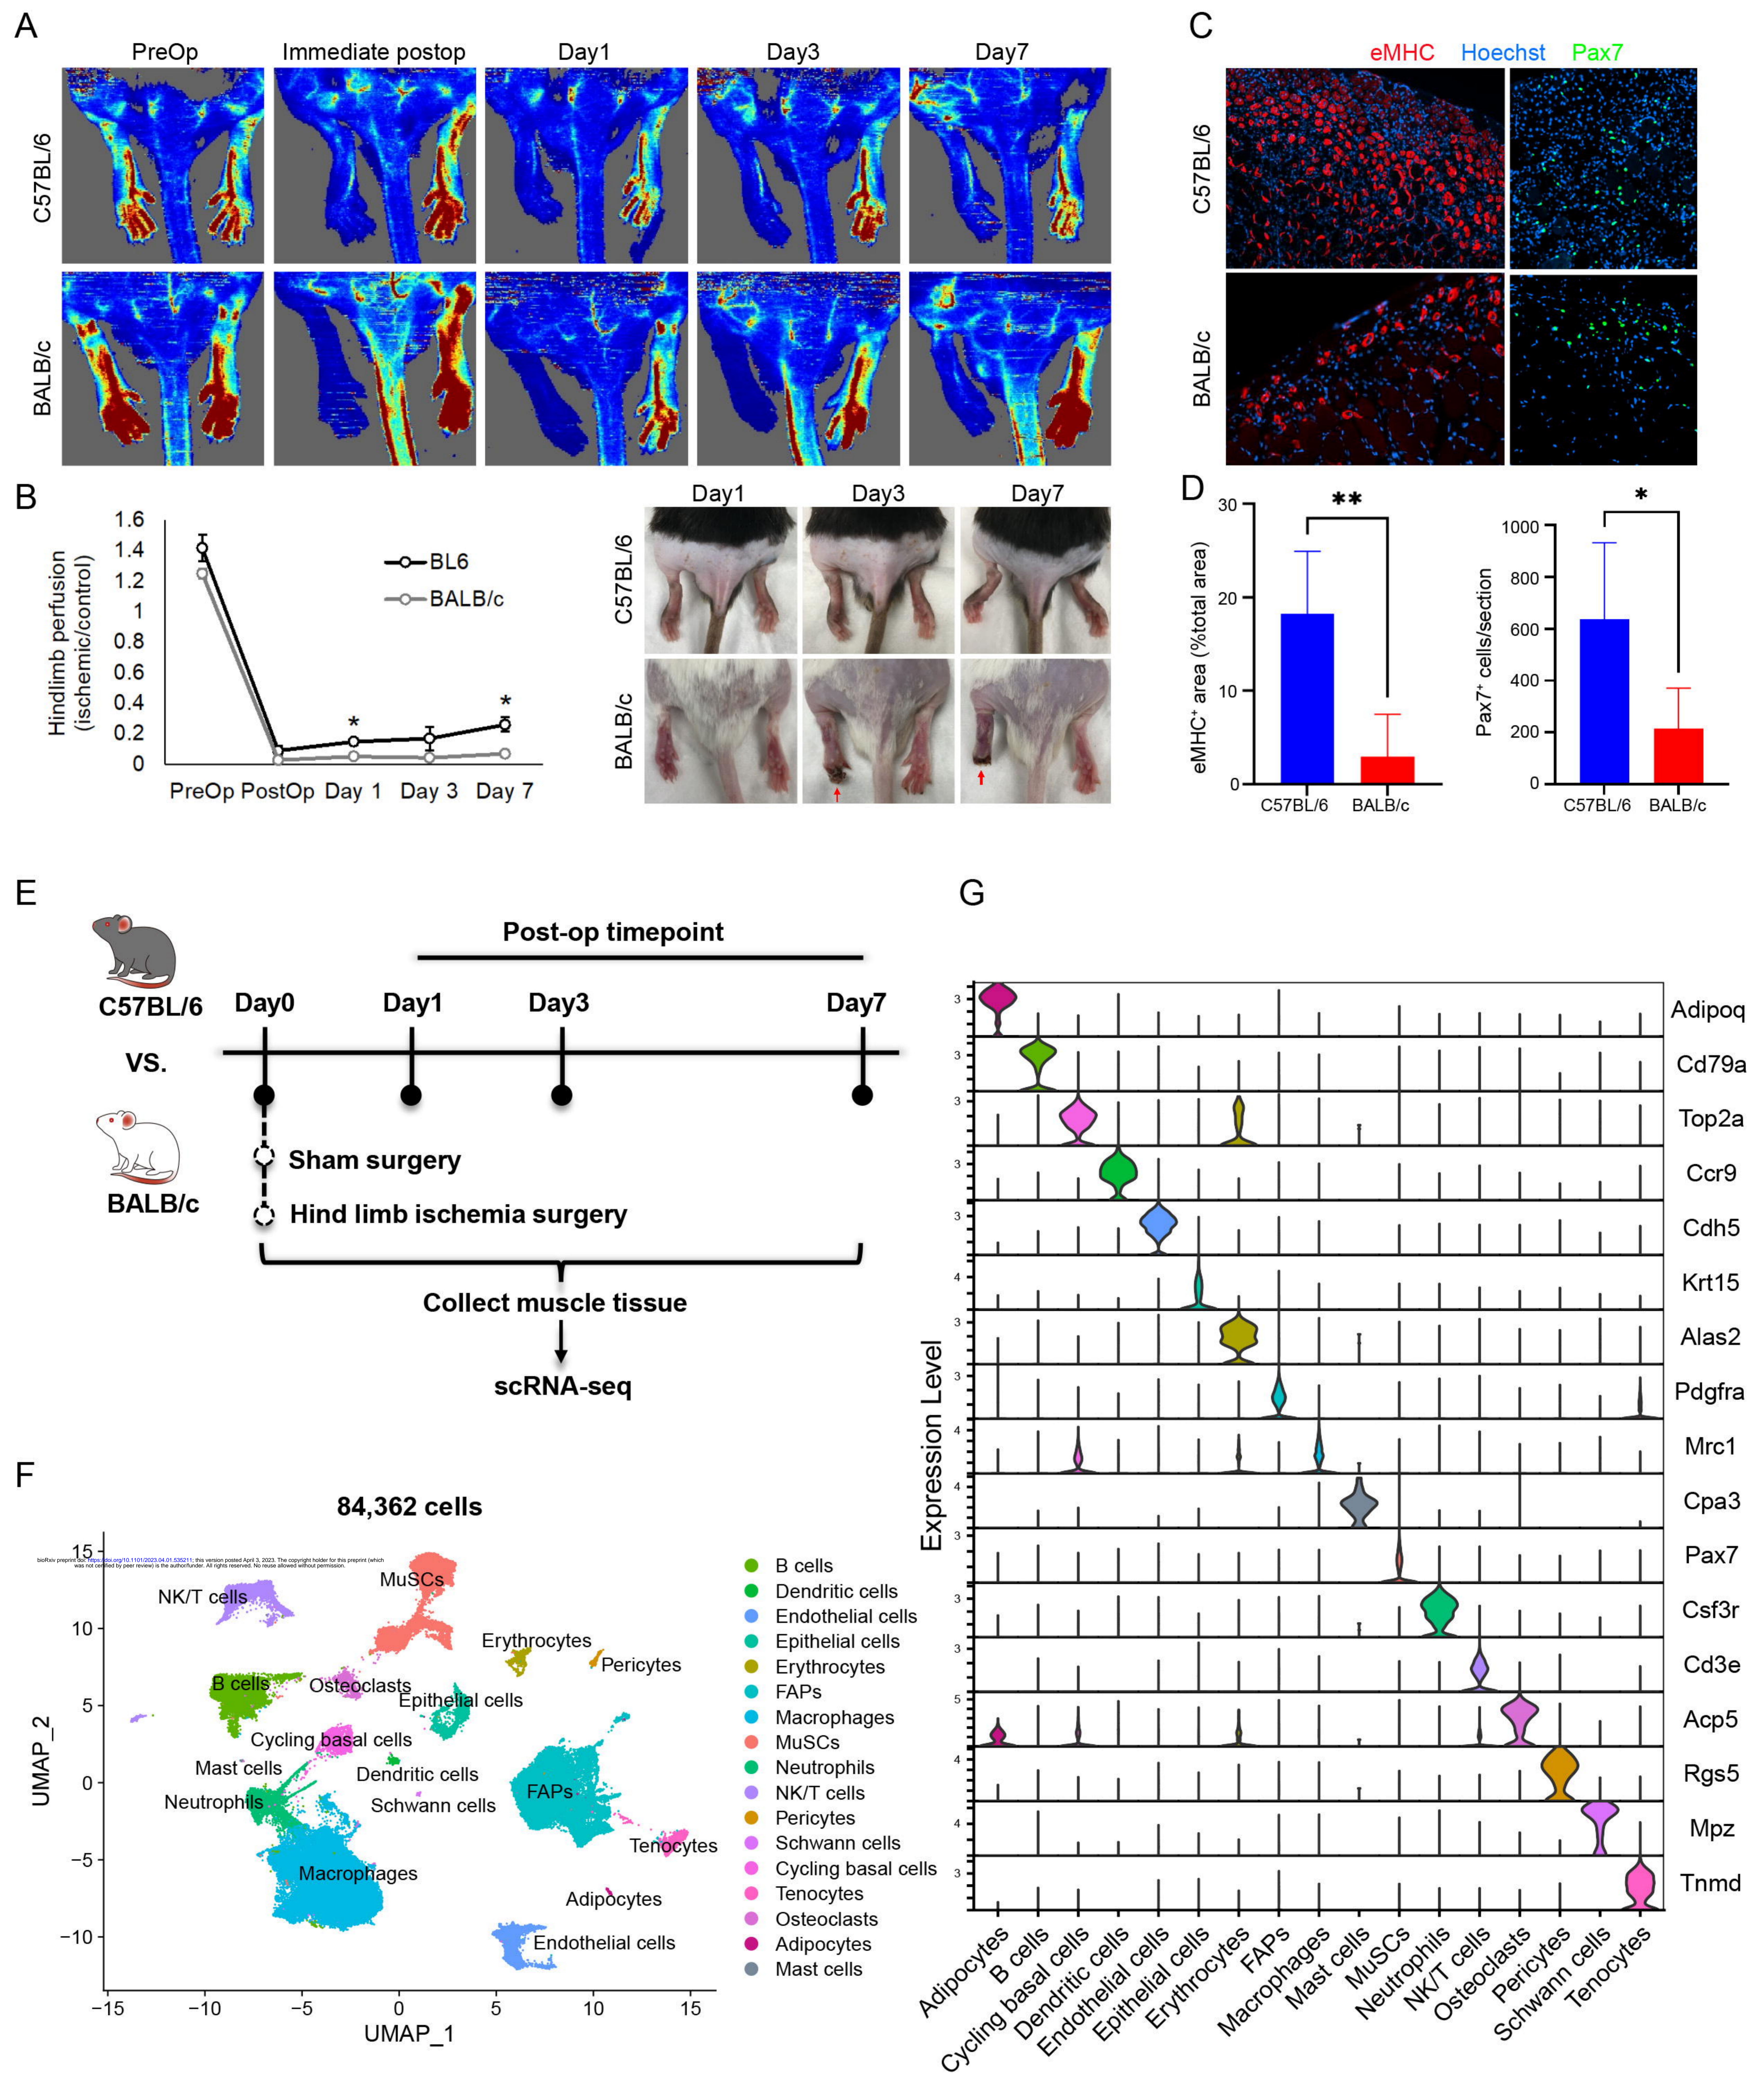

A

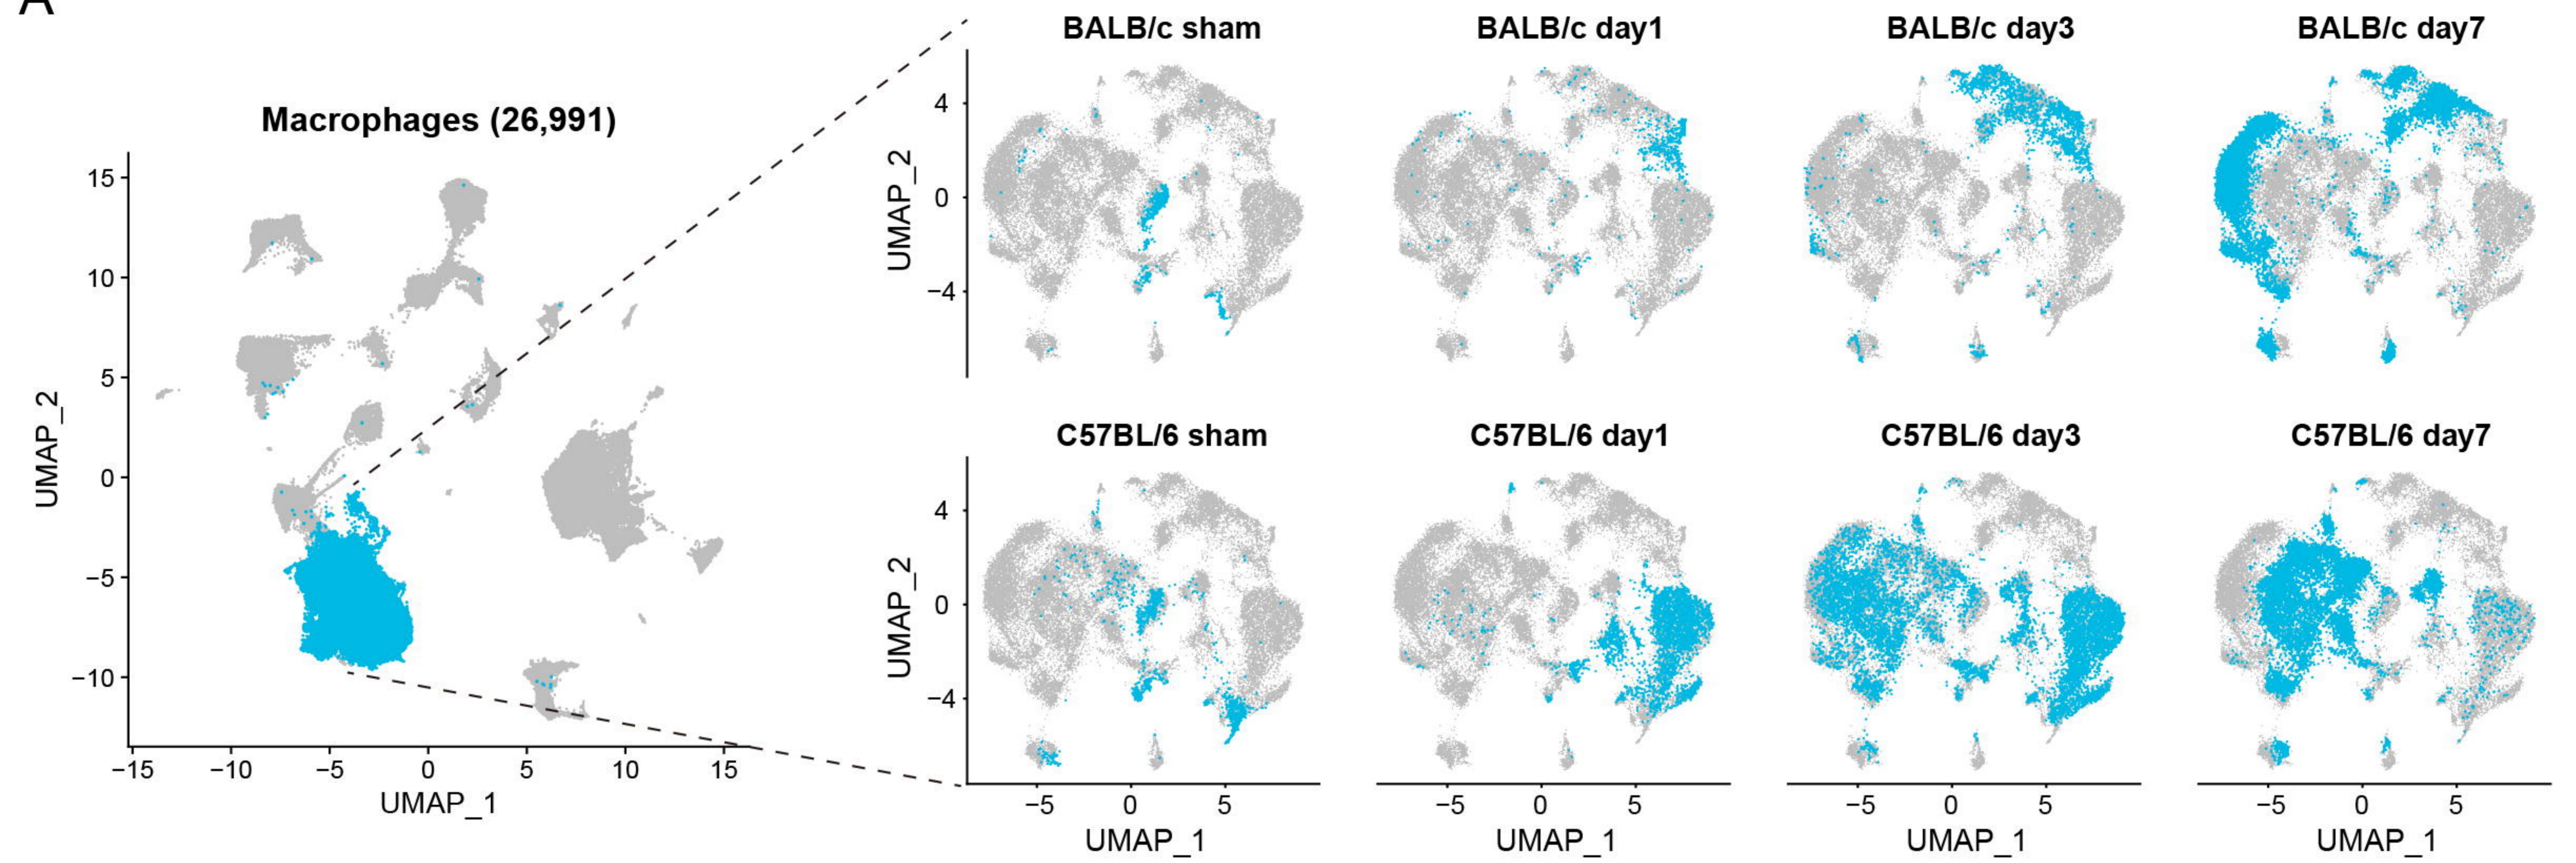

B

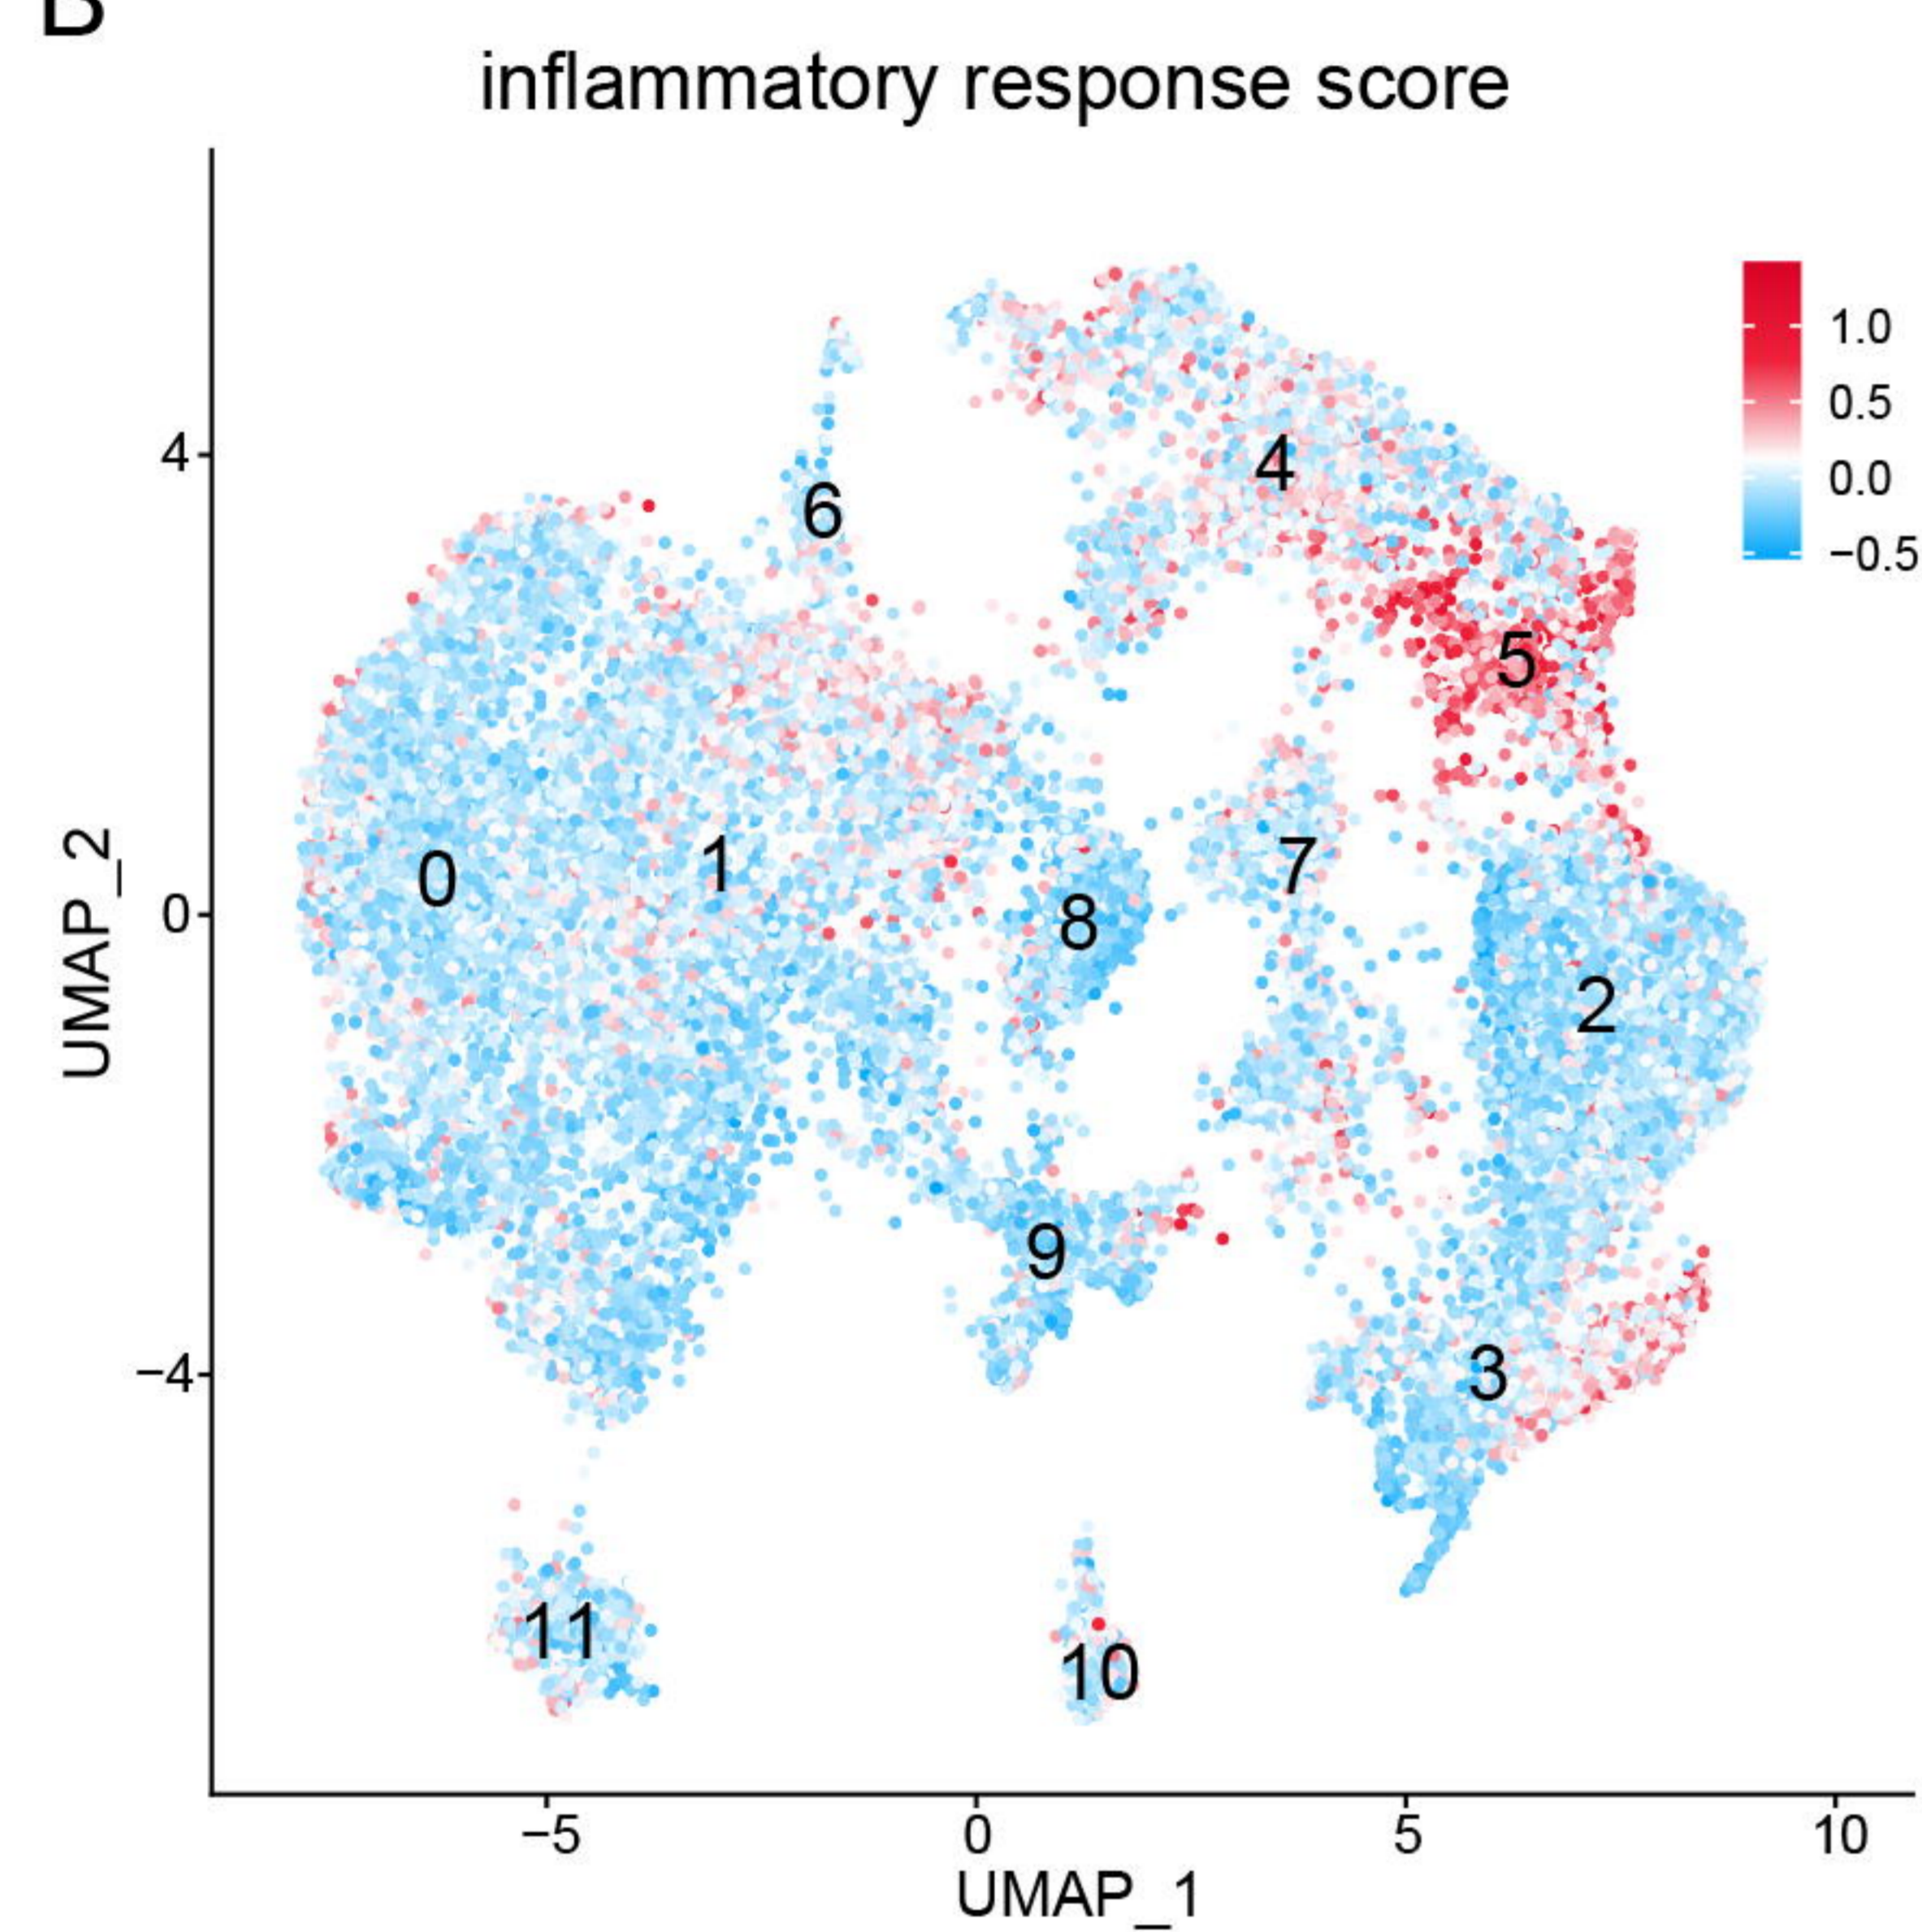

C

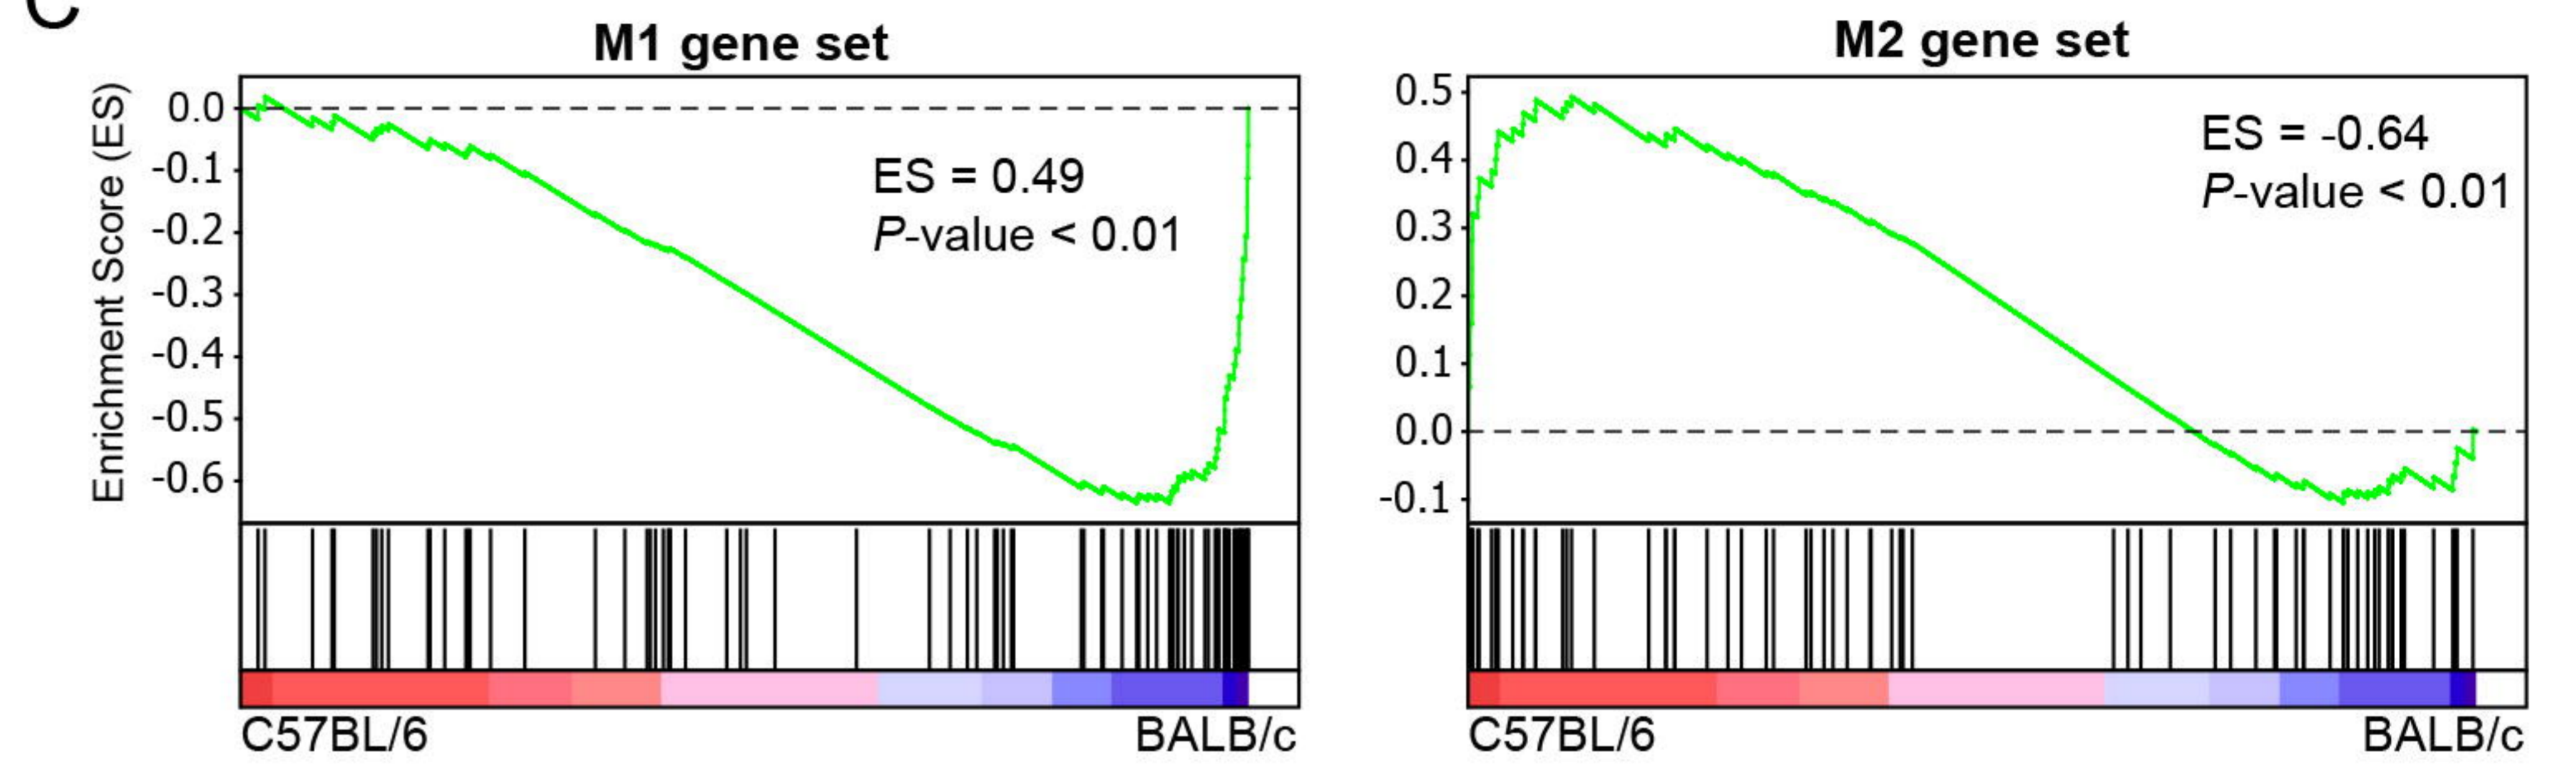

D

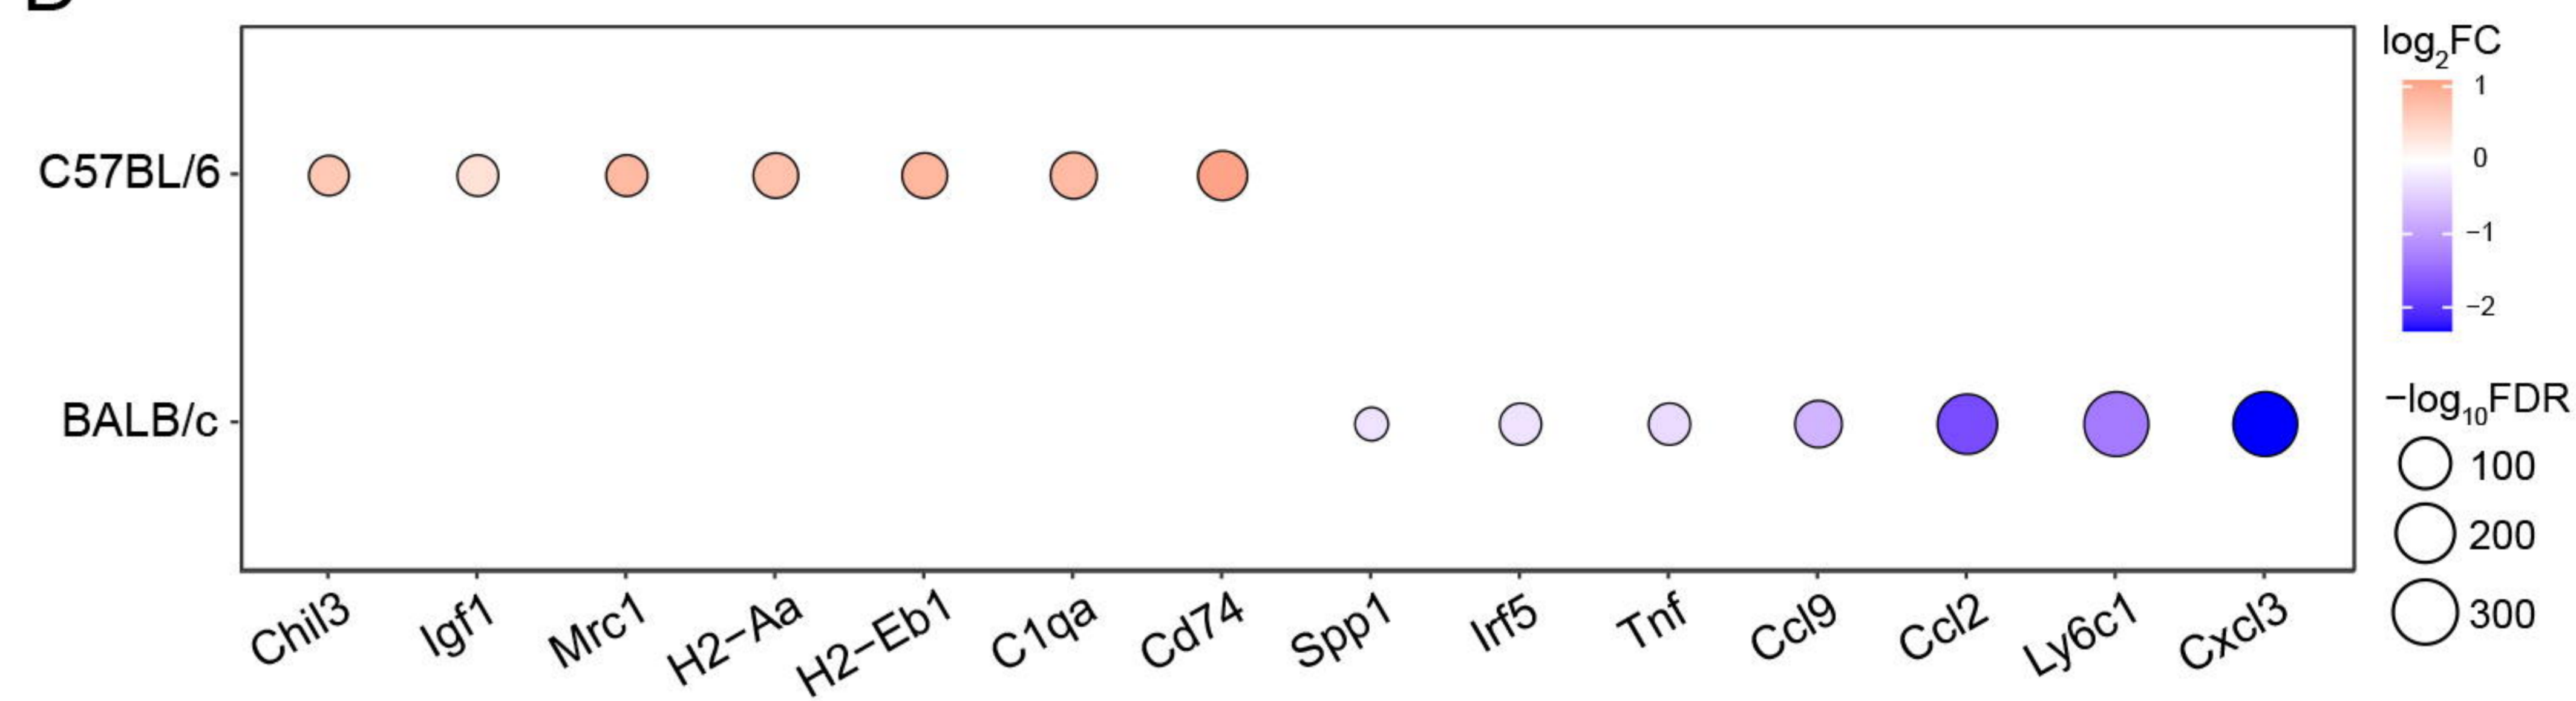

E

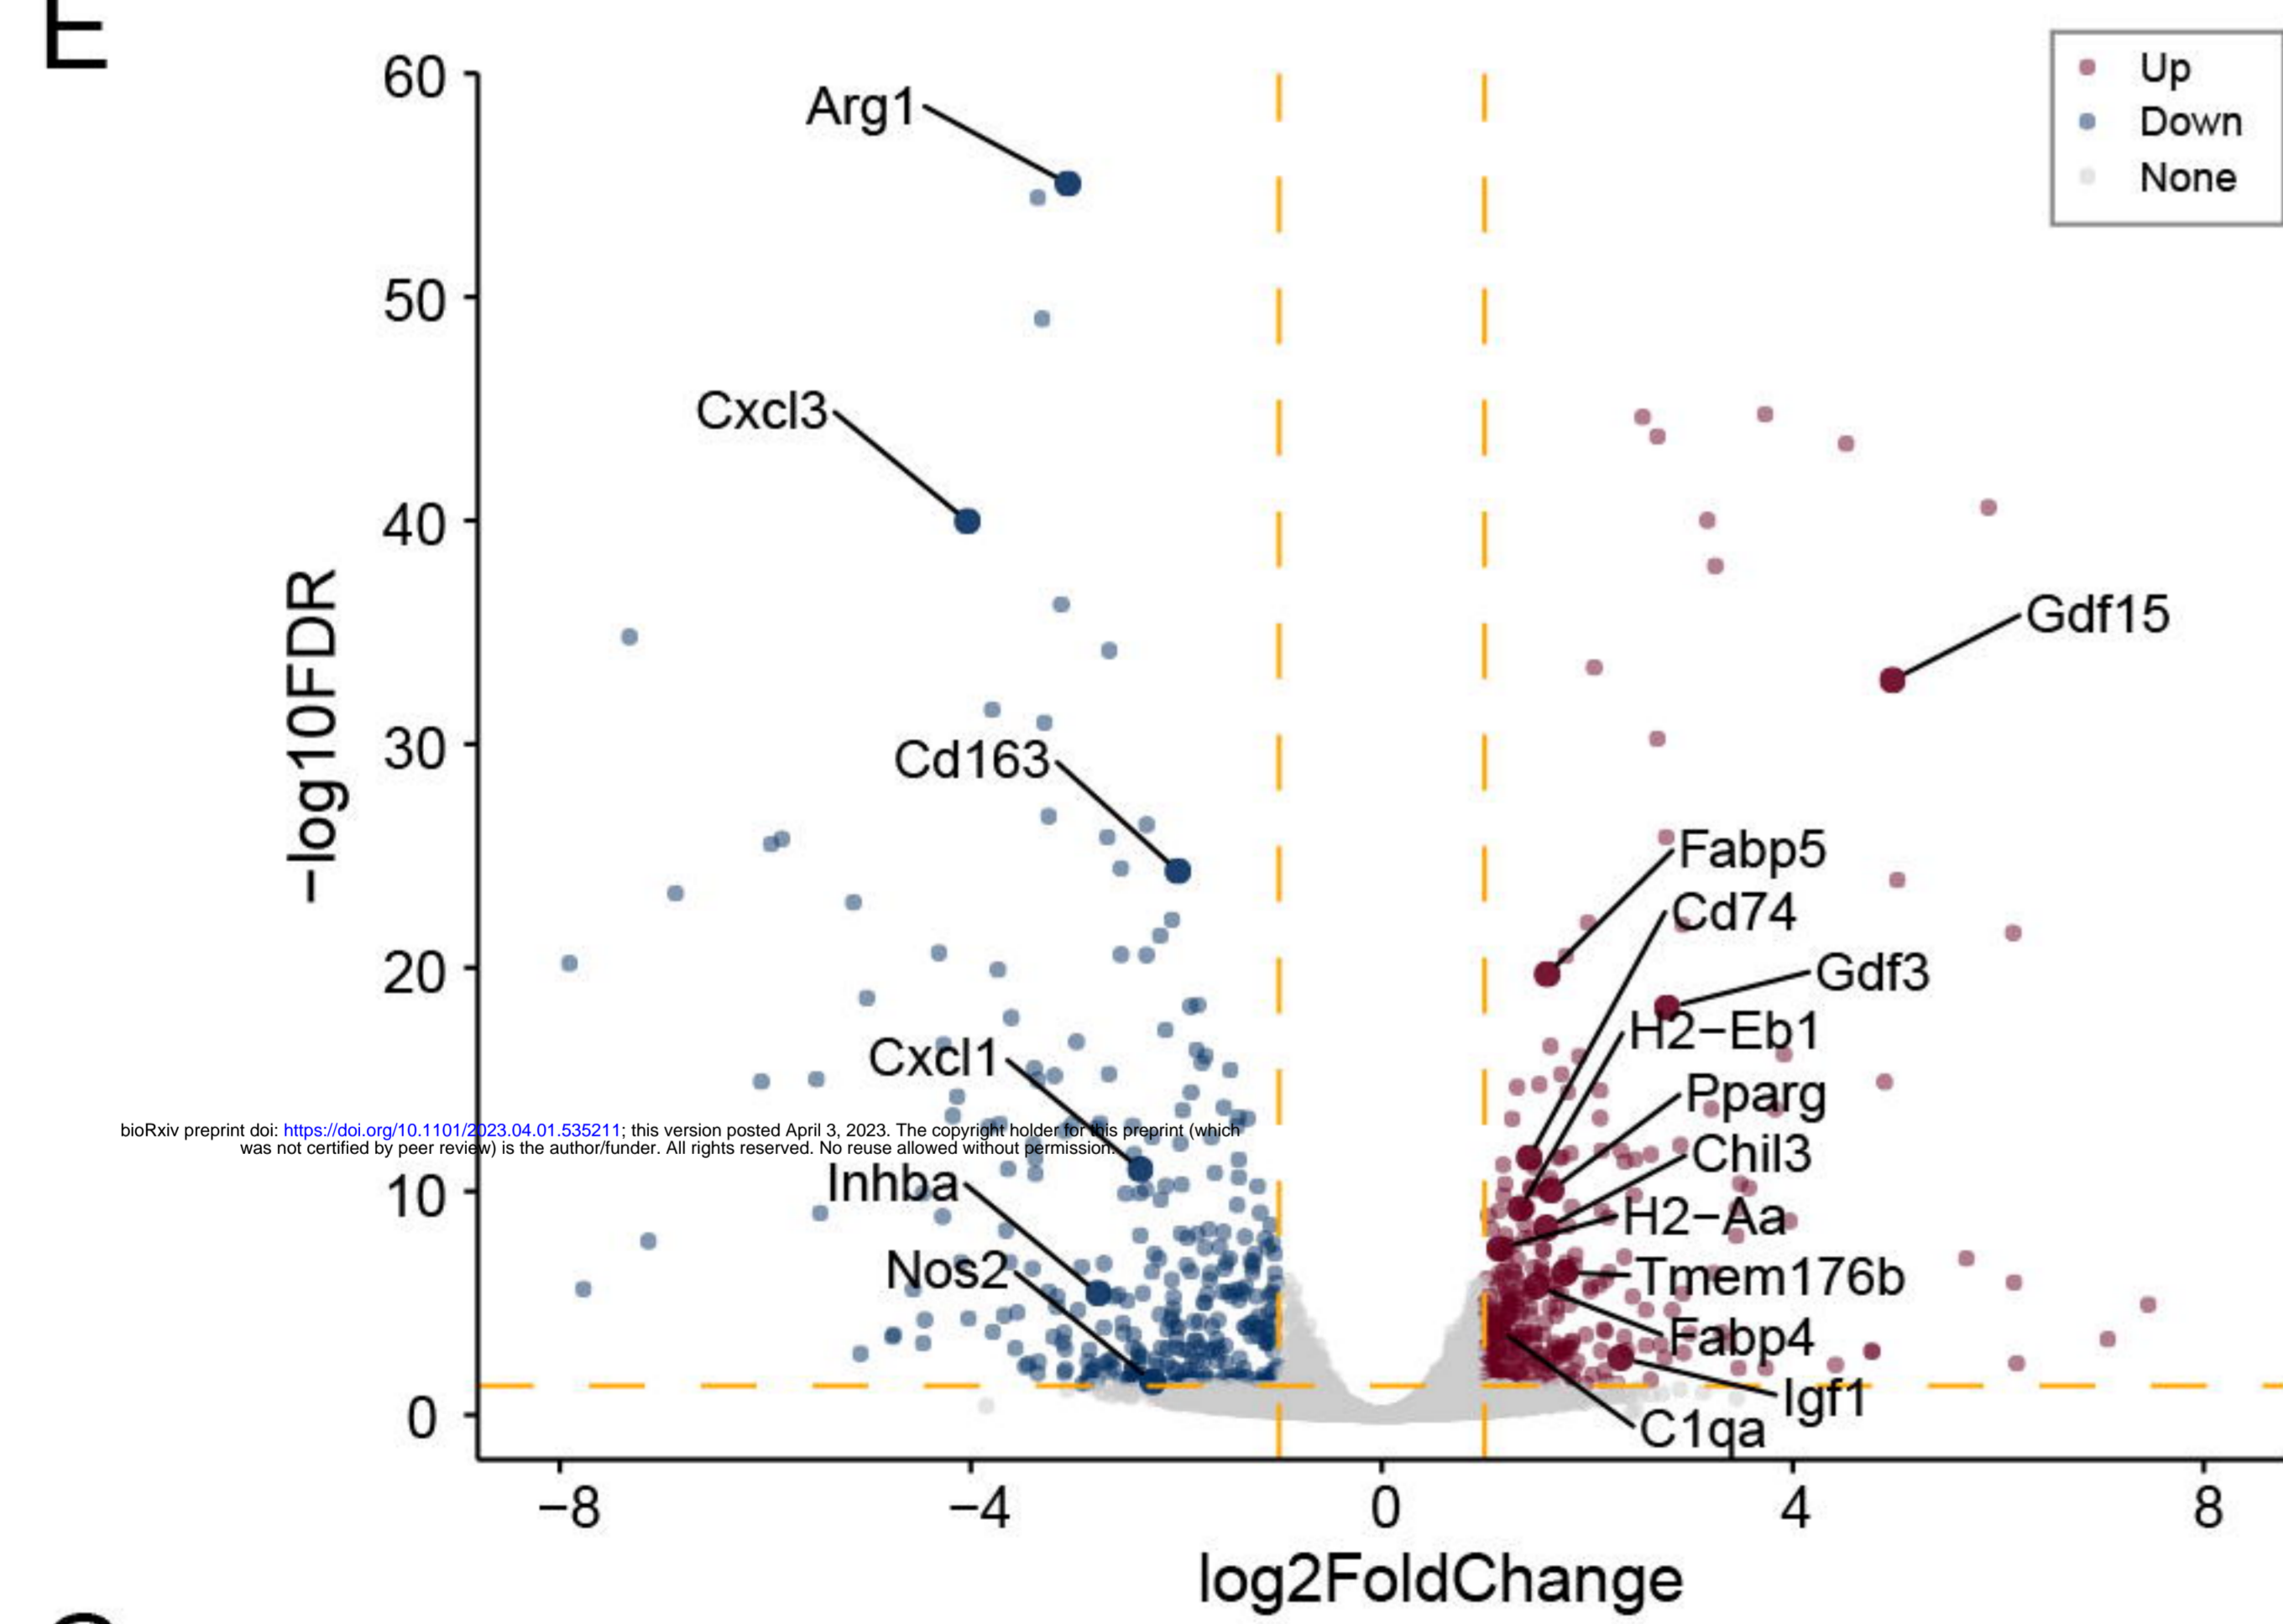

F

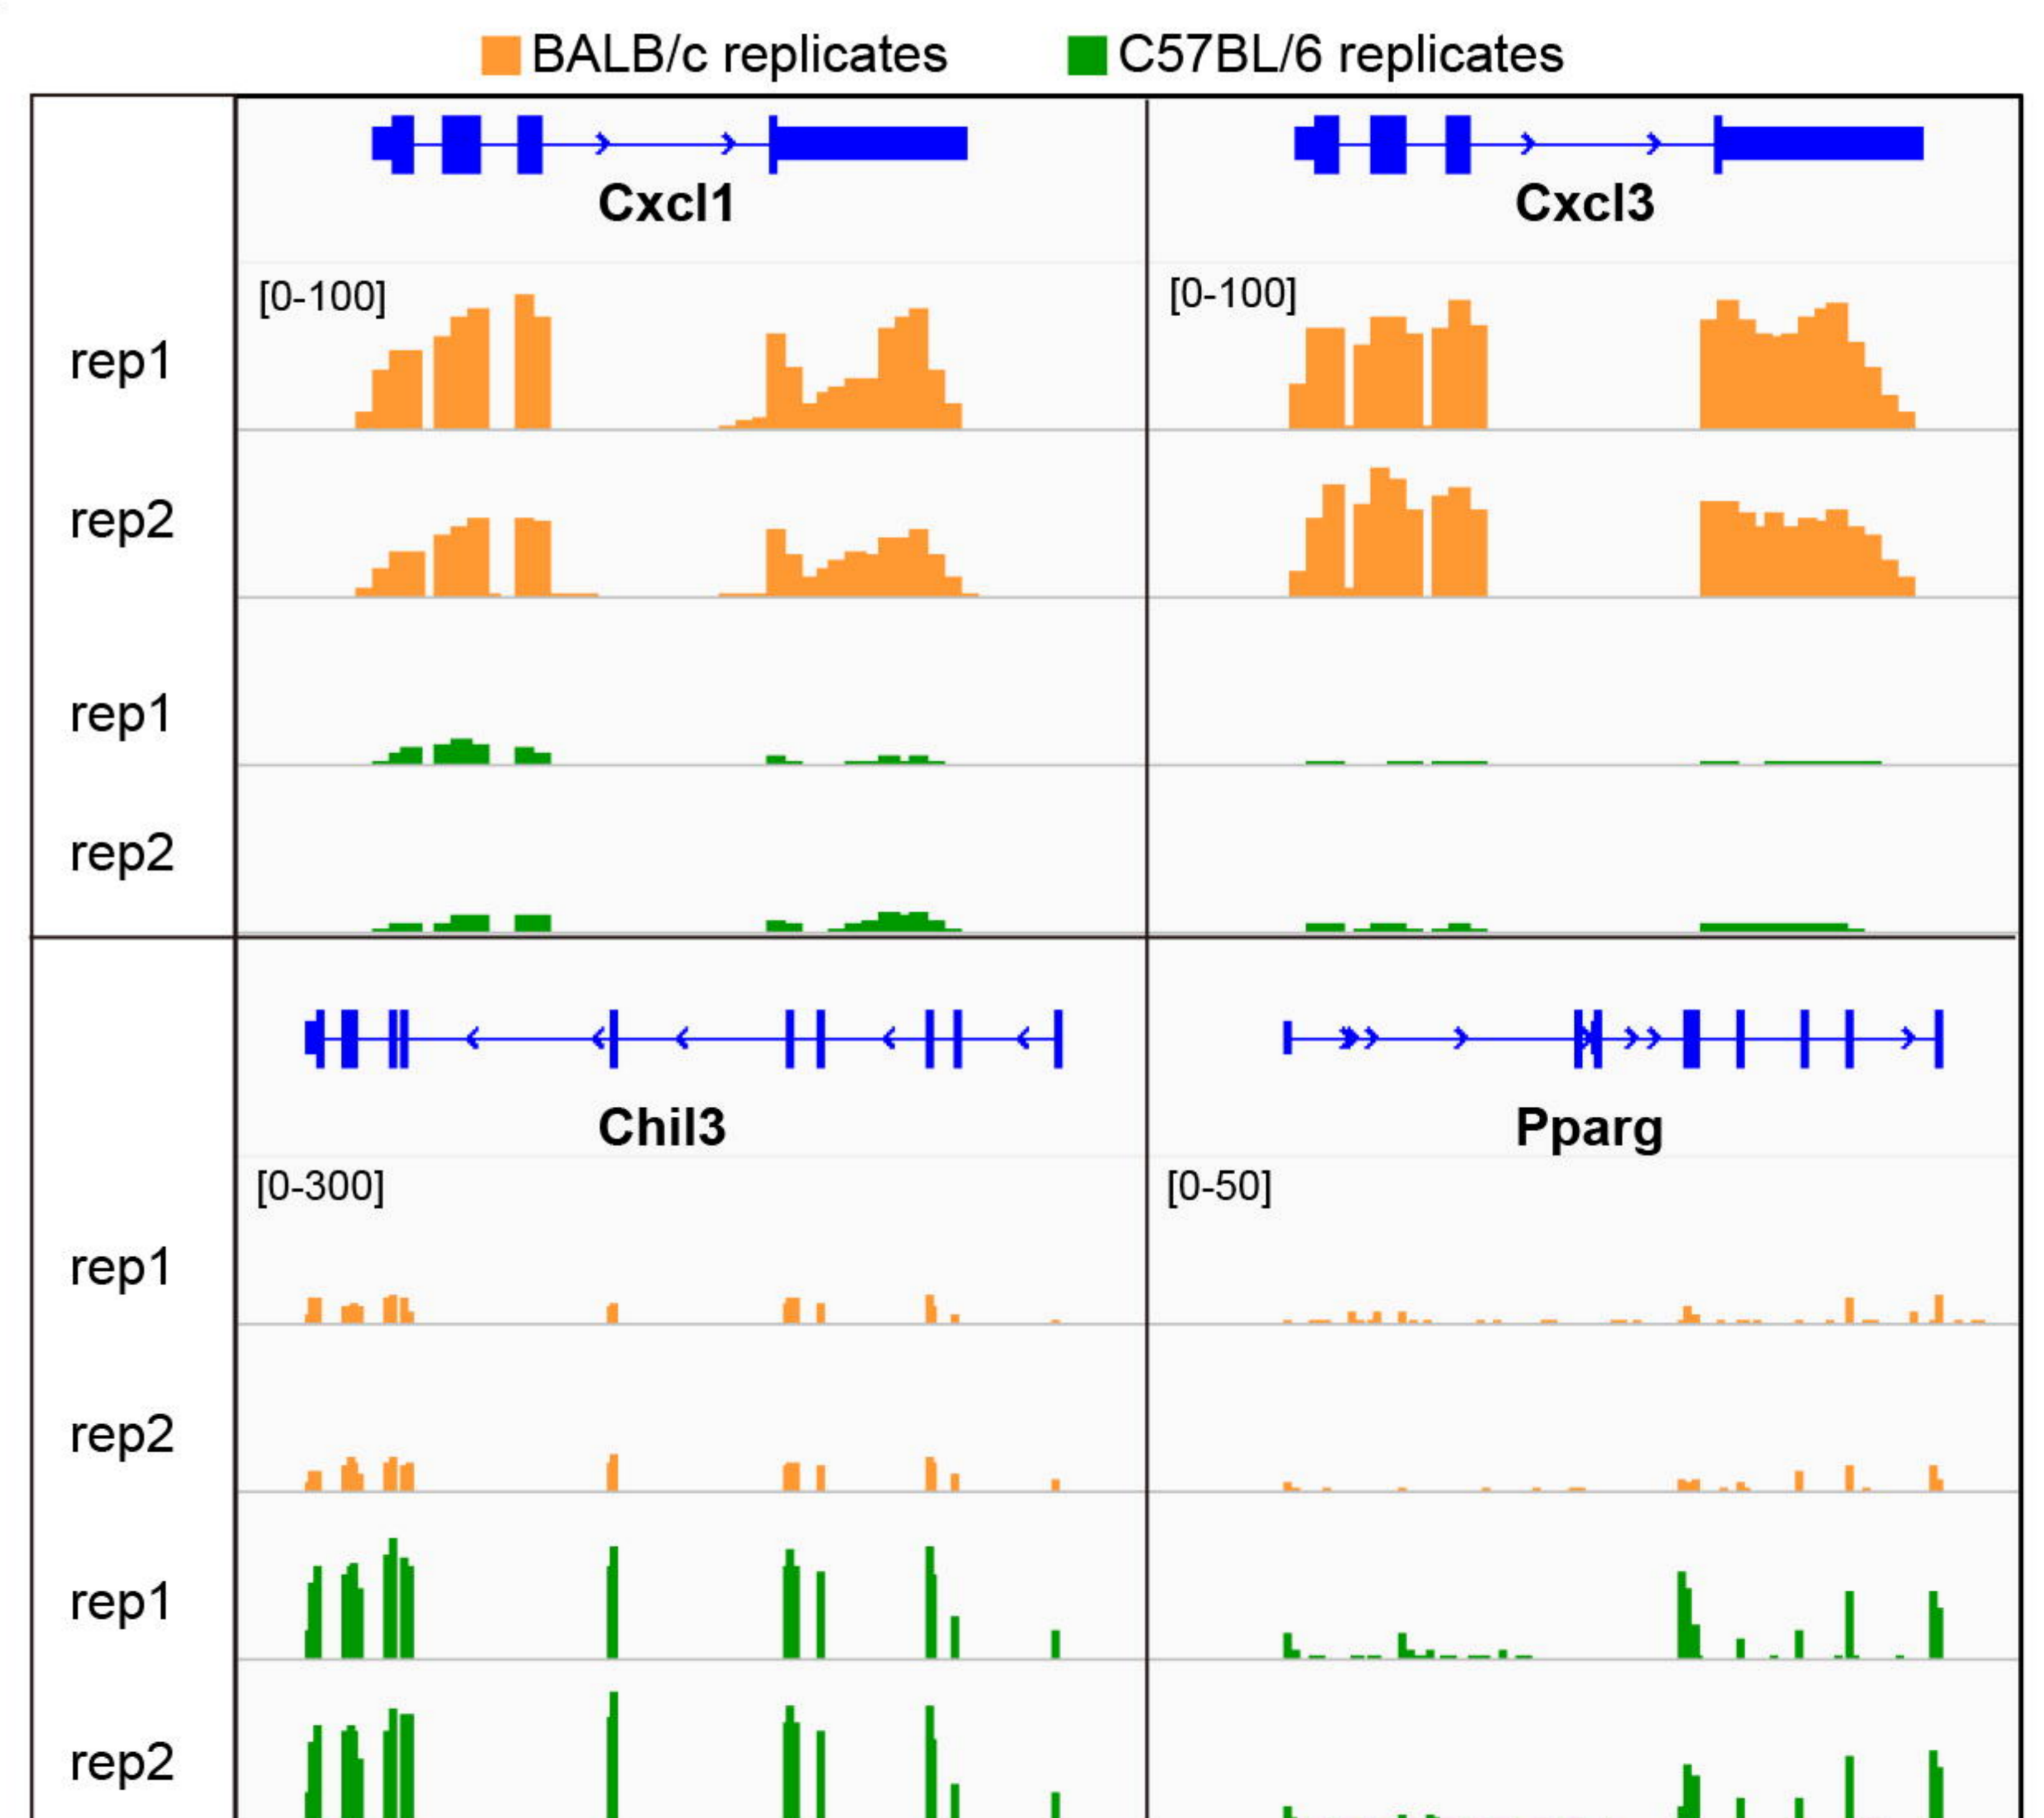

G

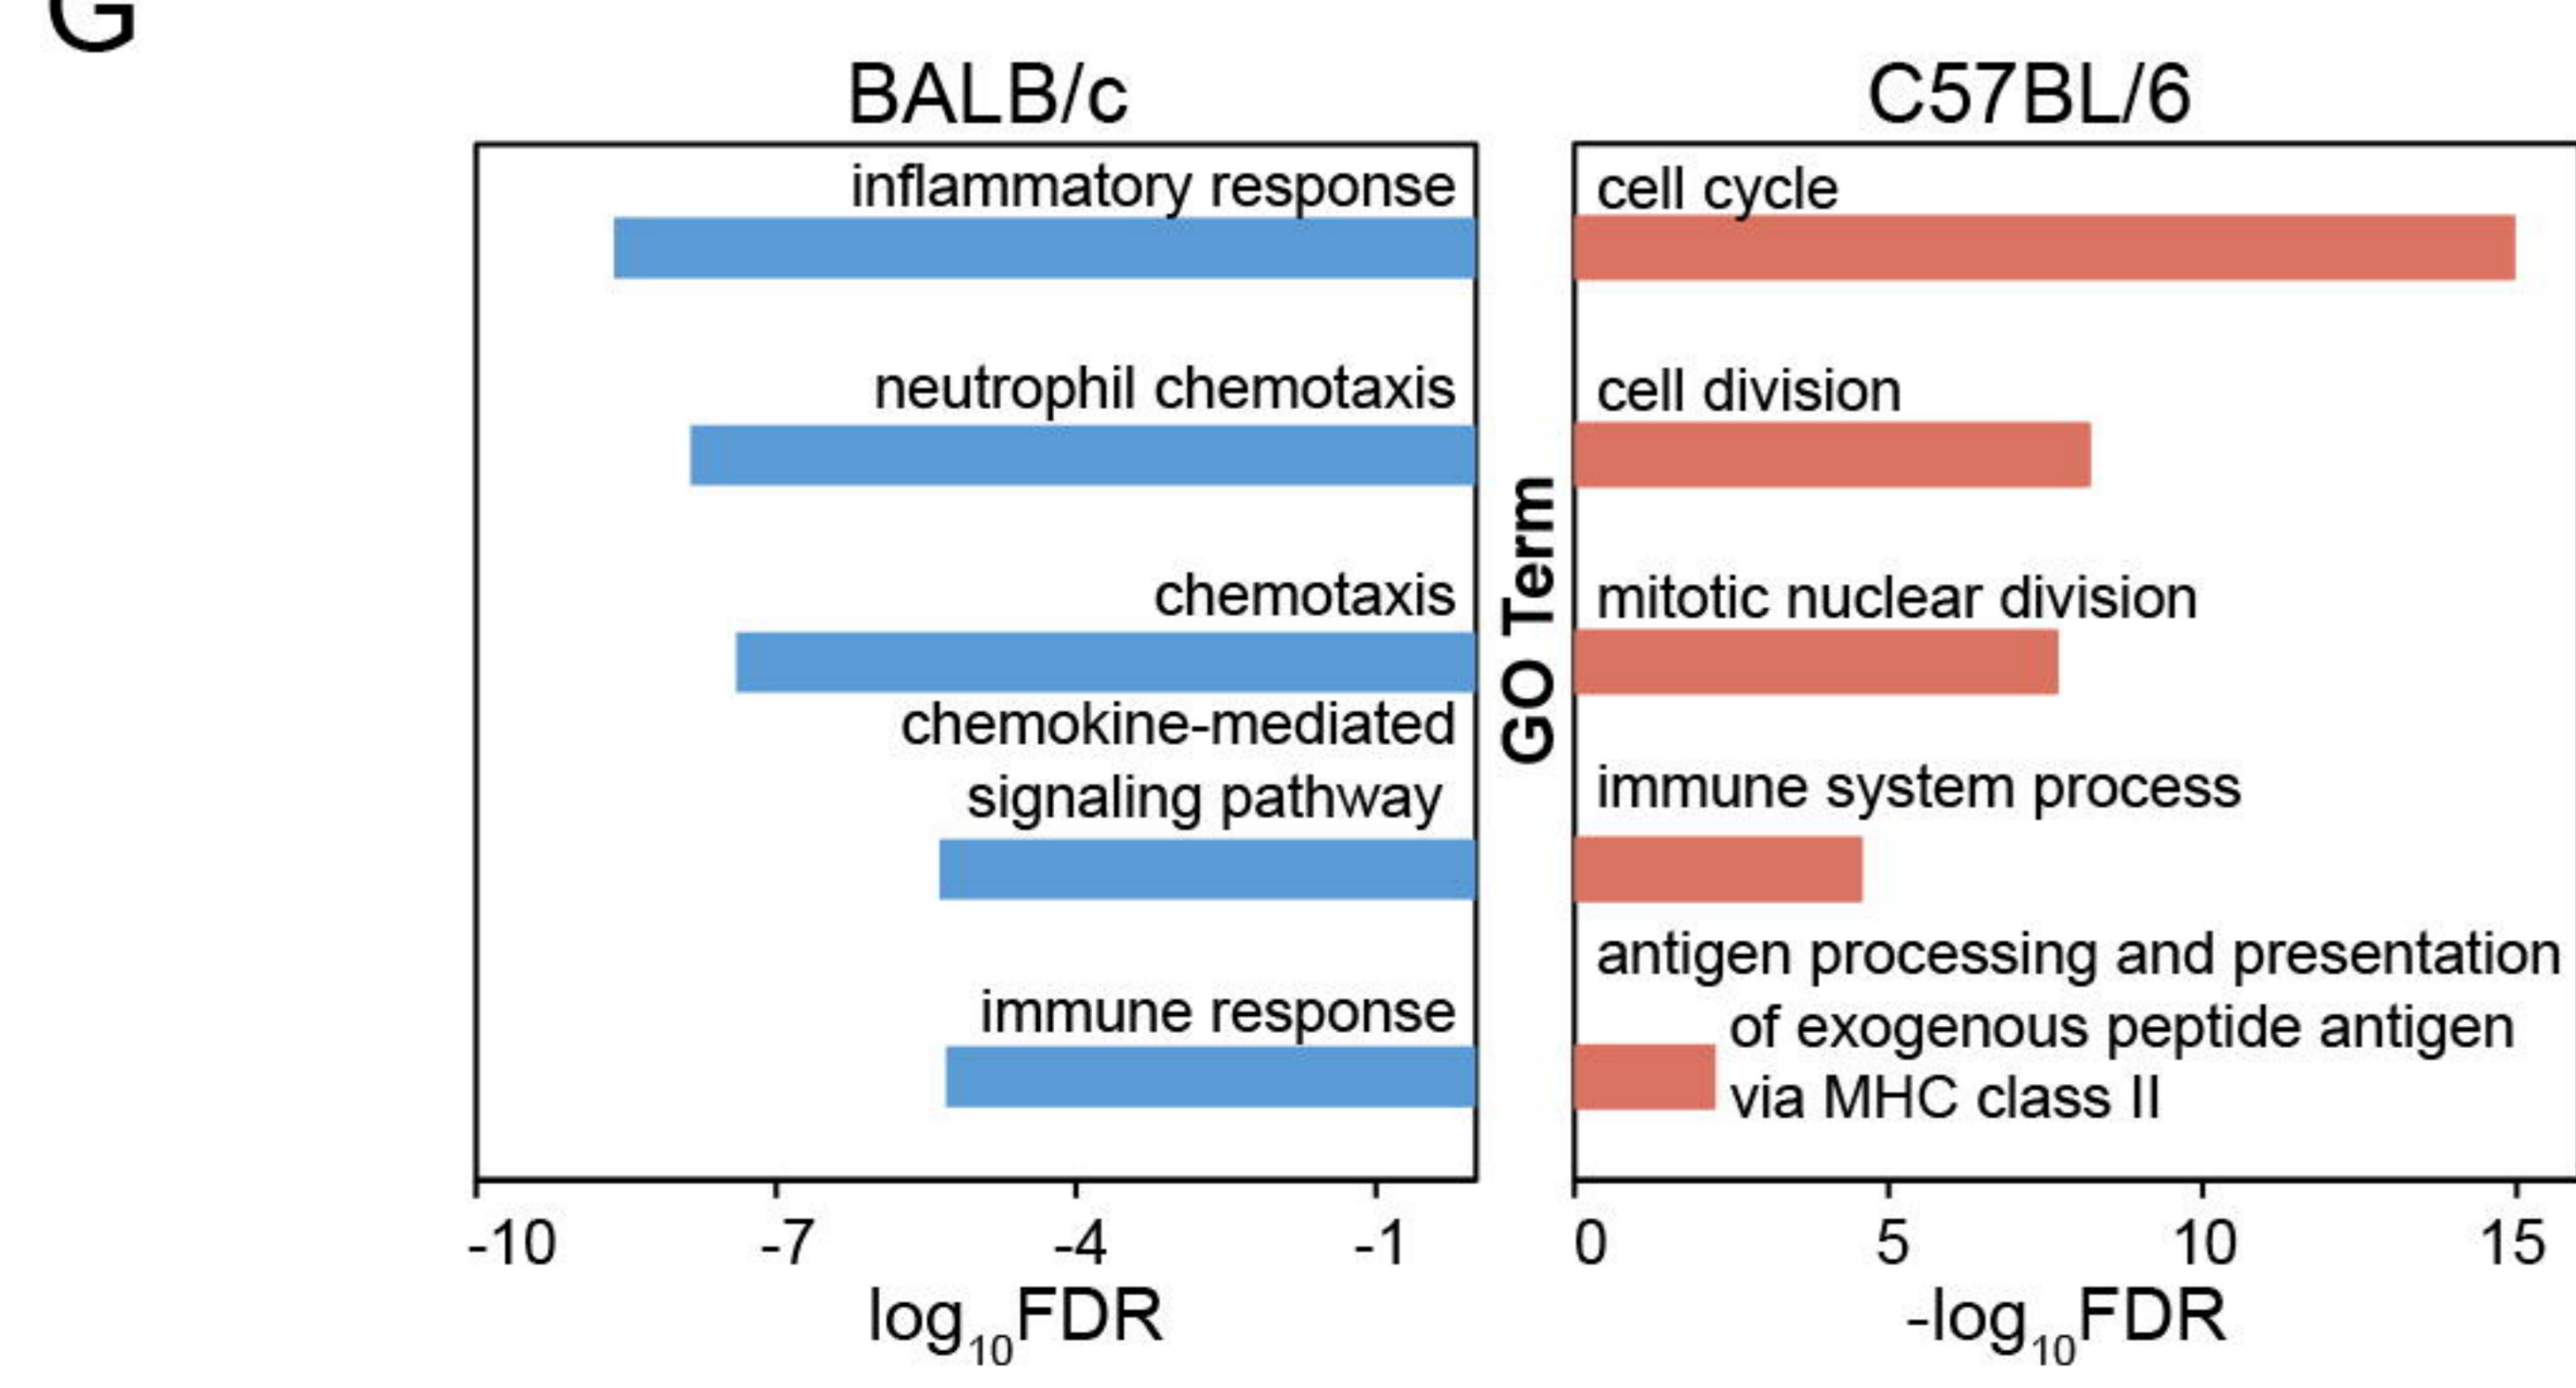

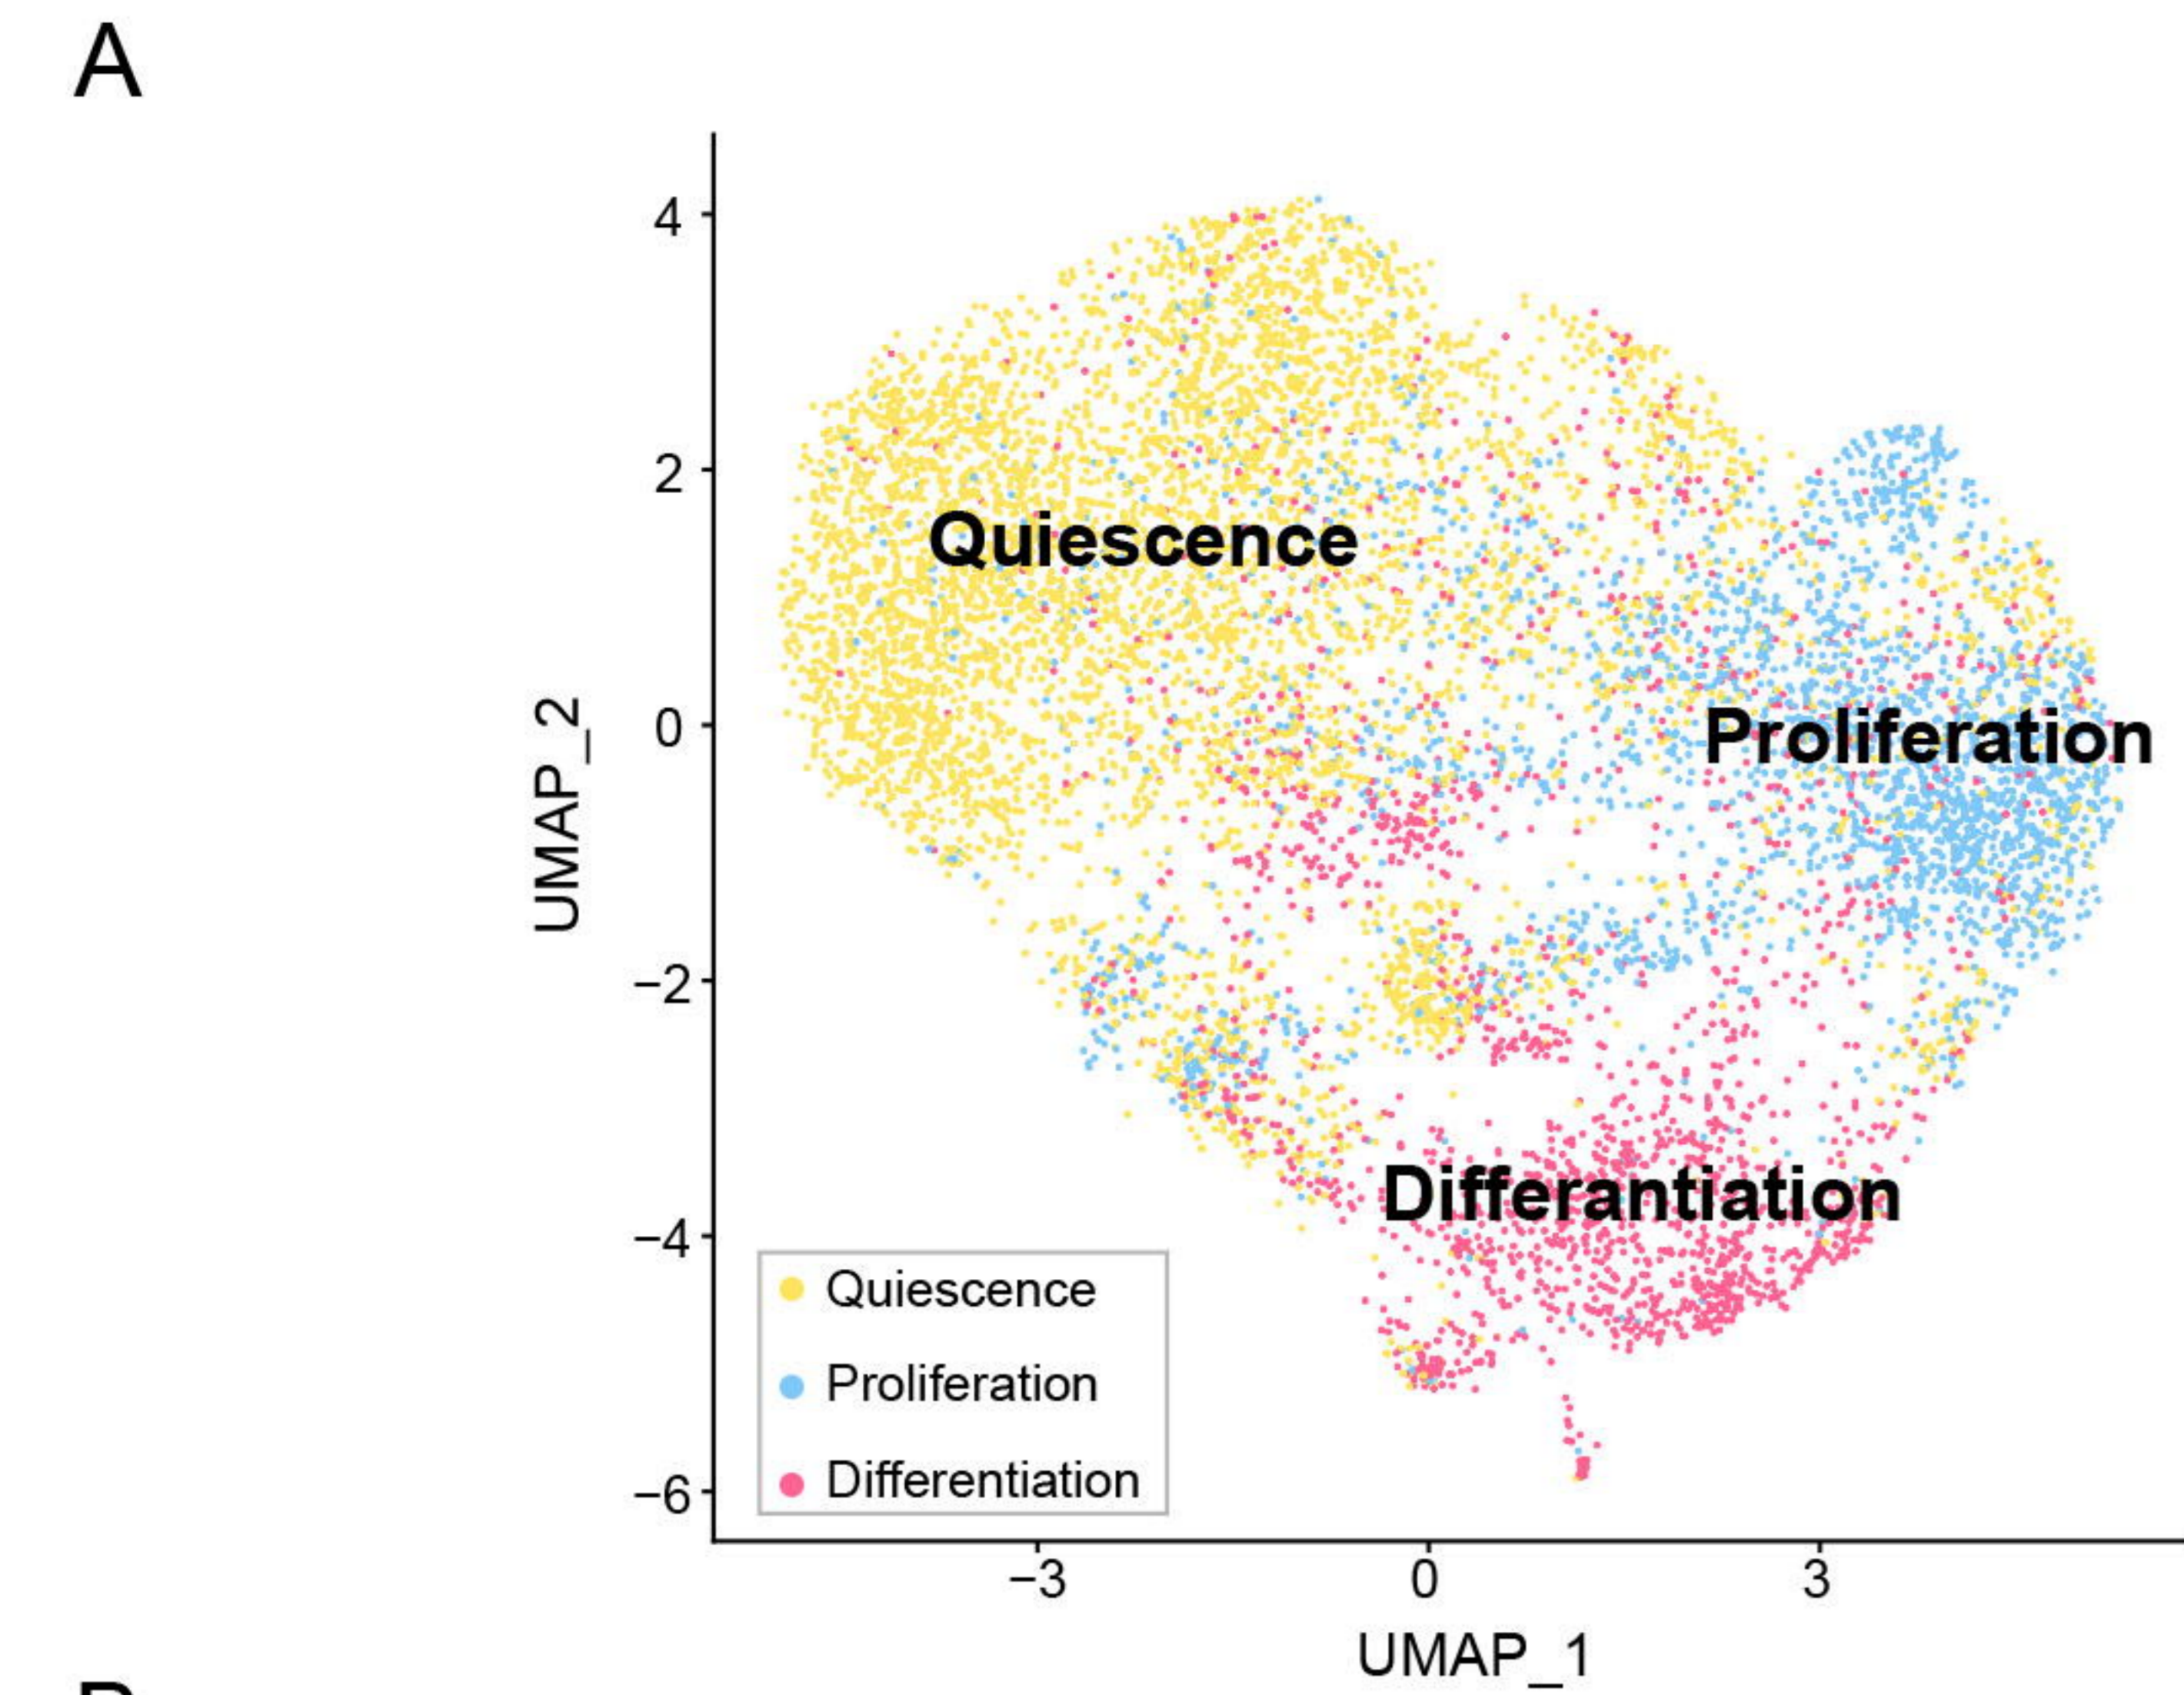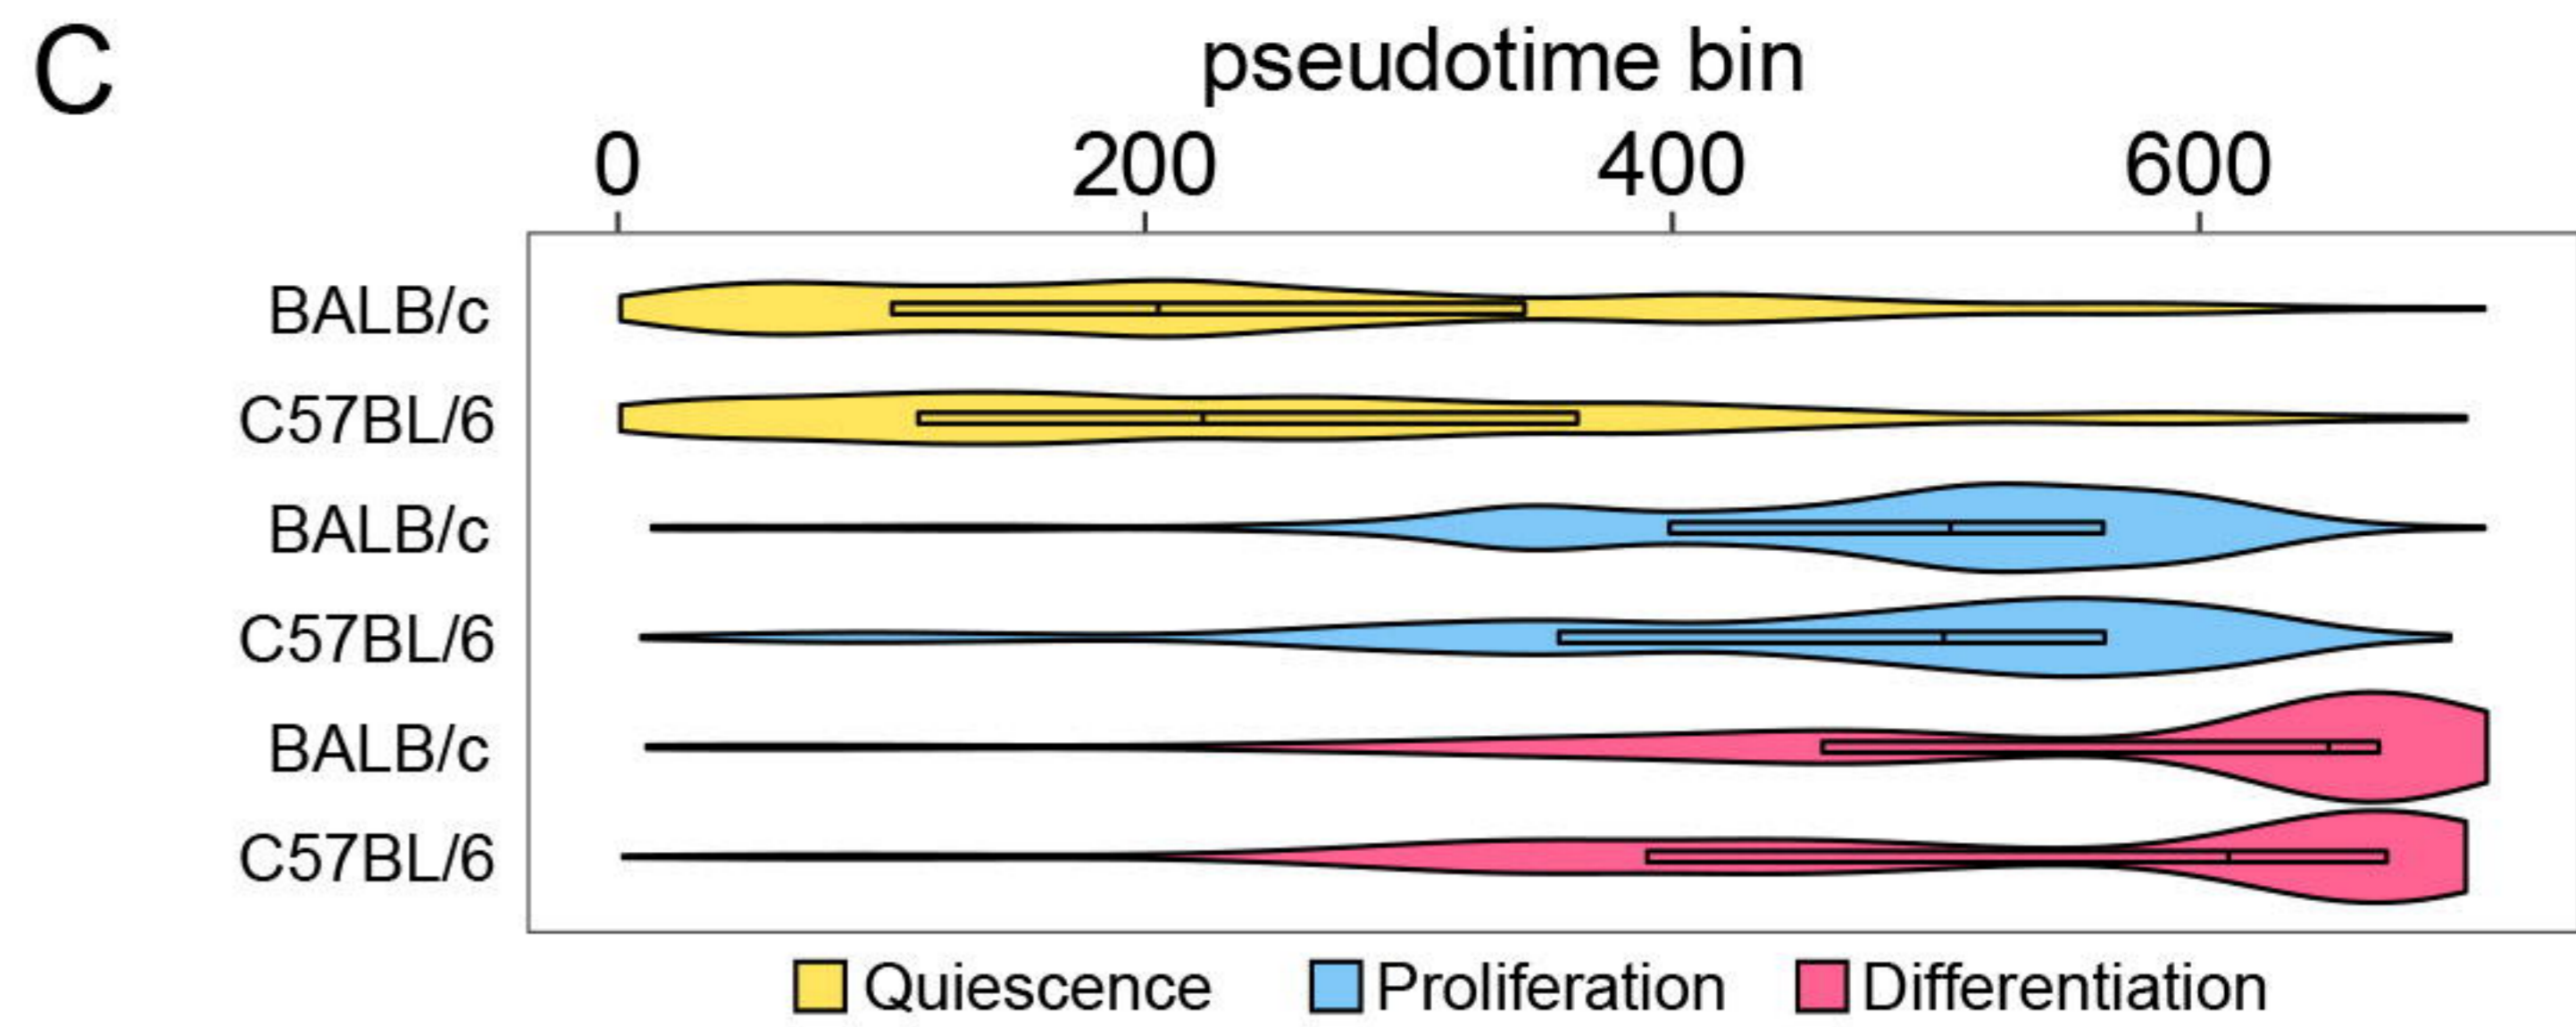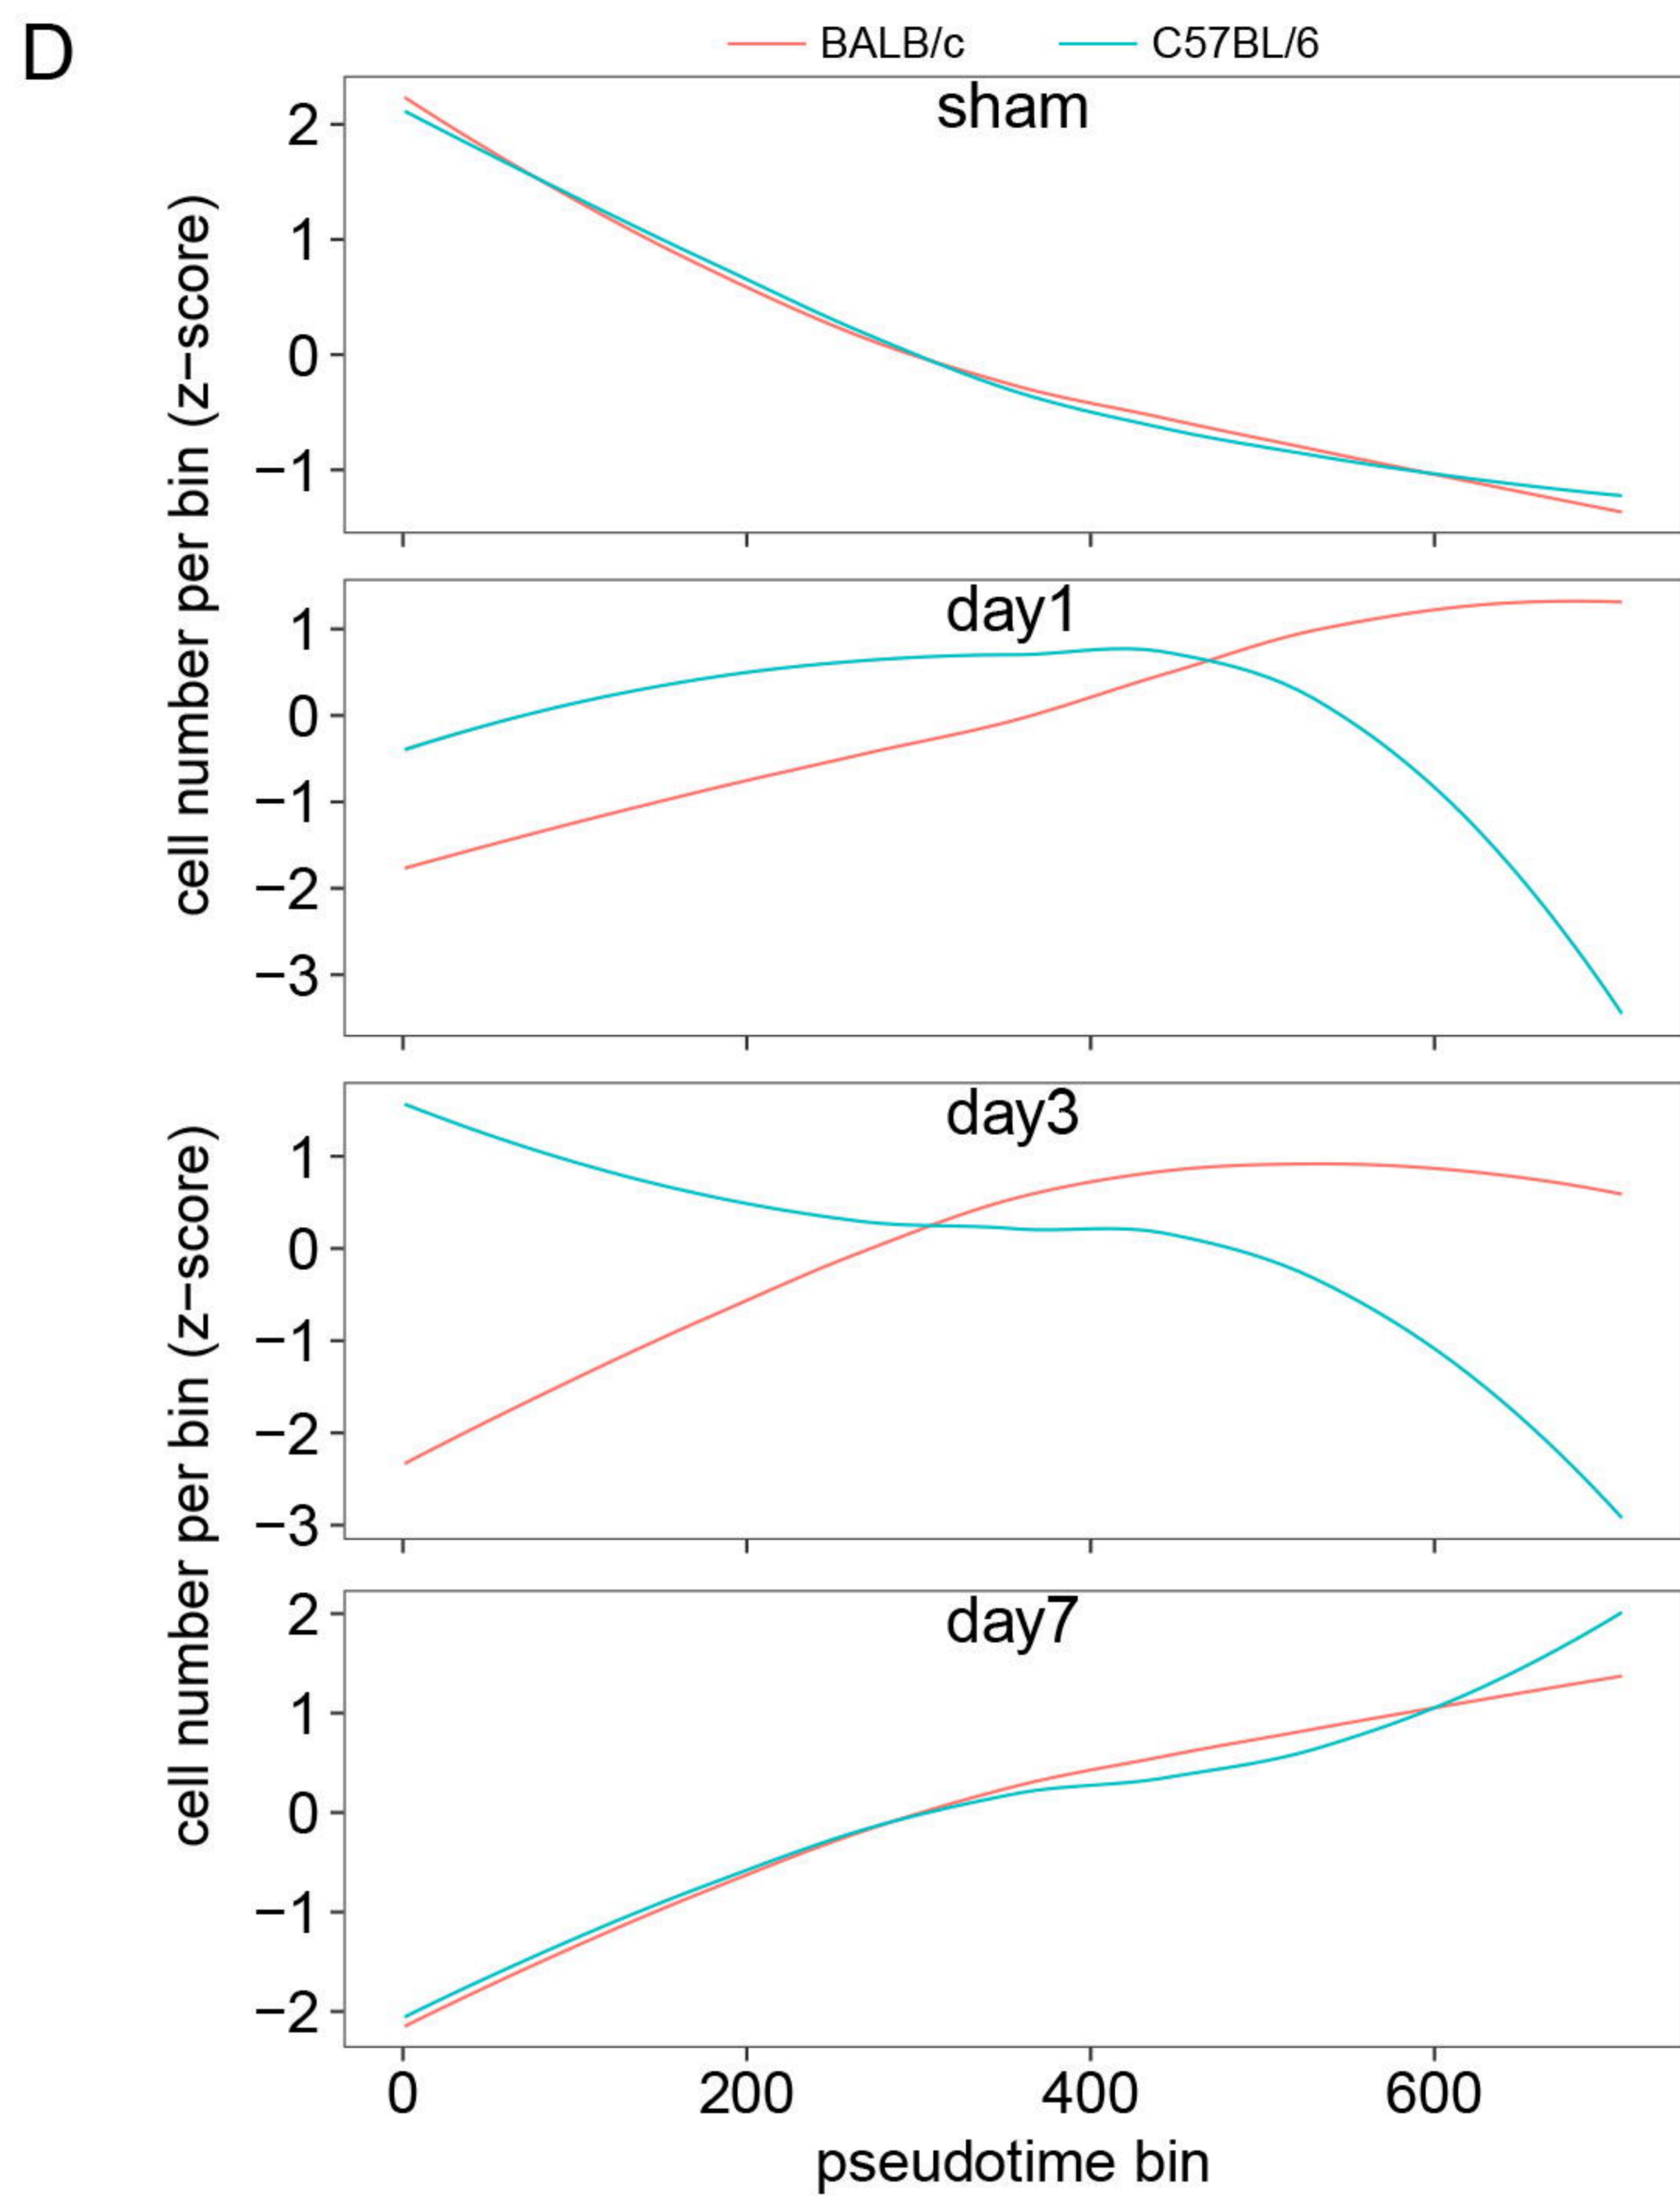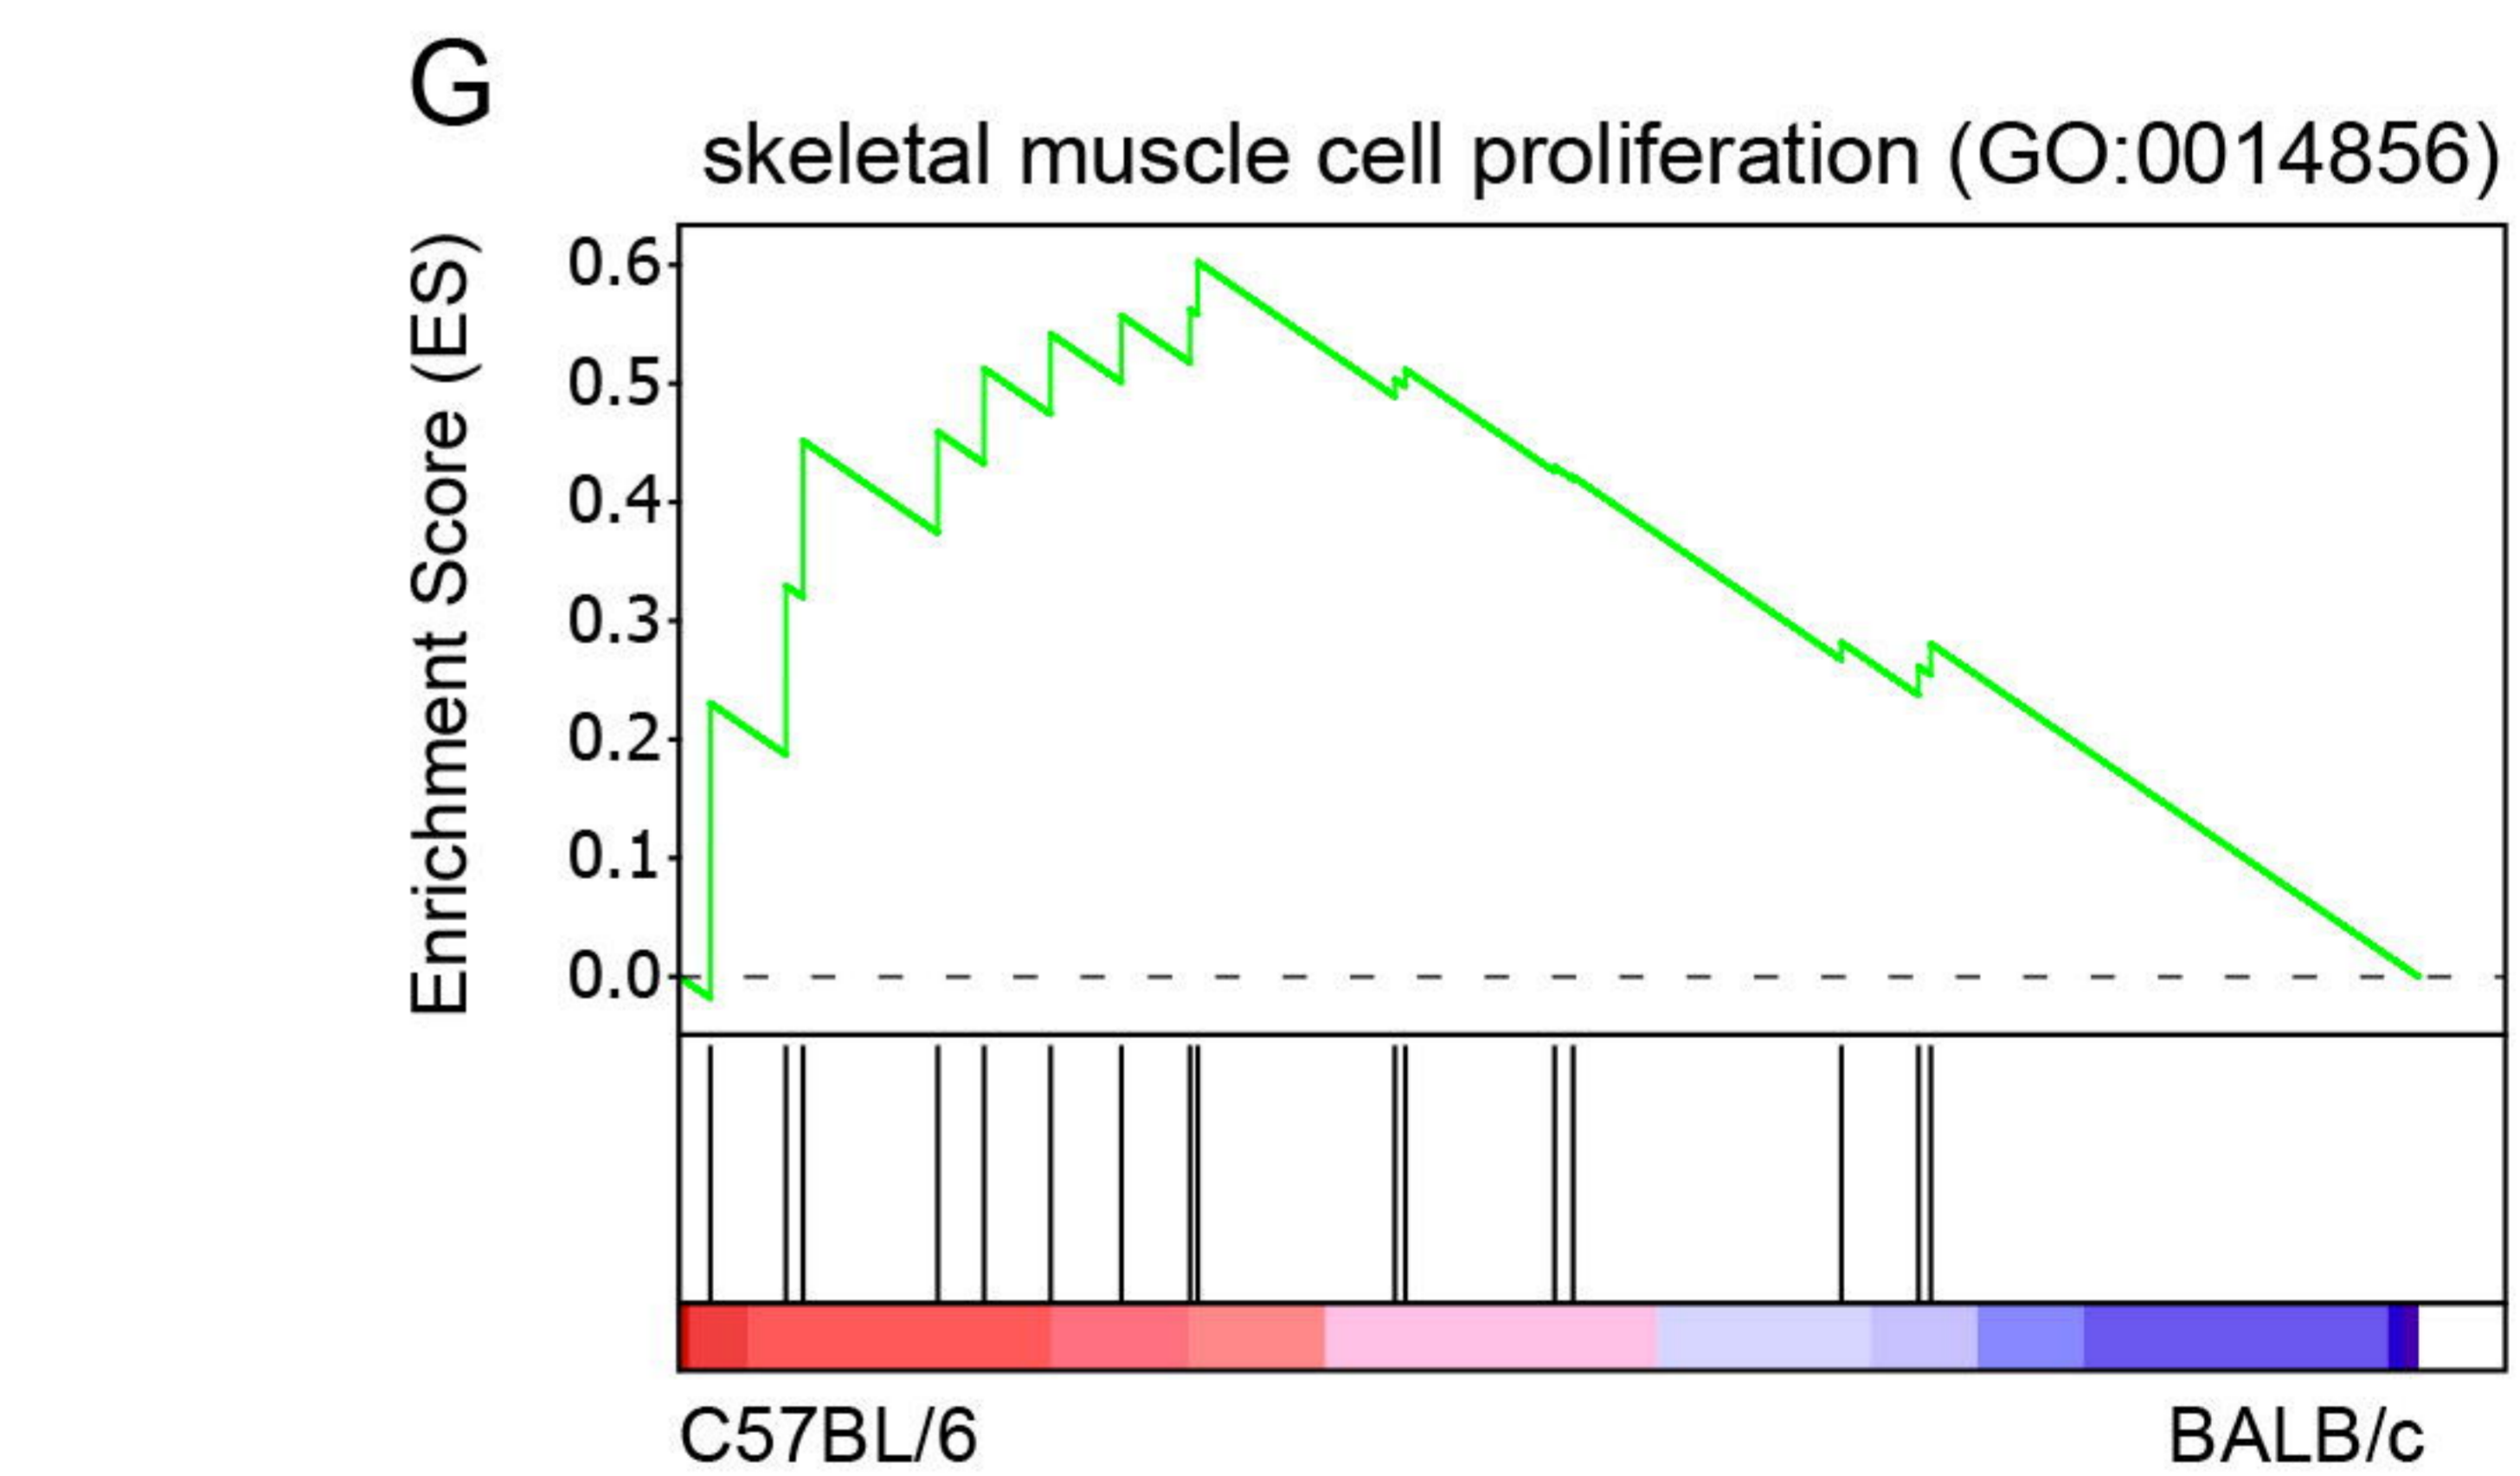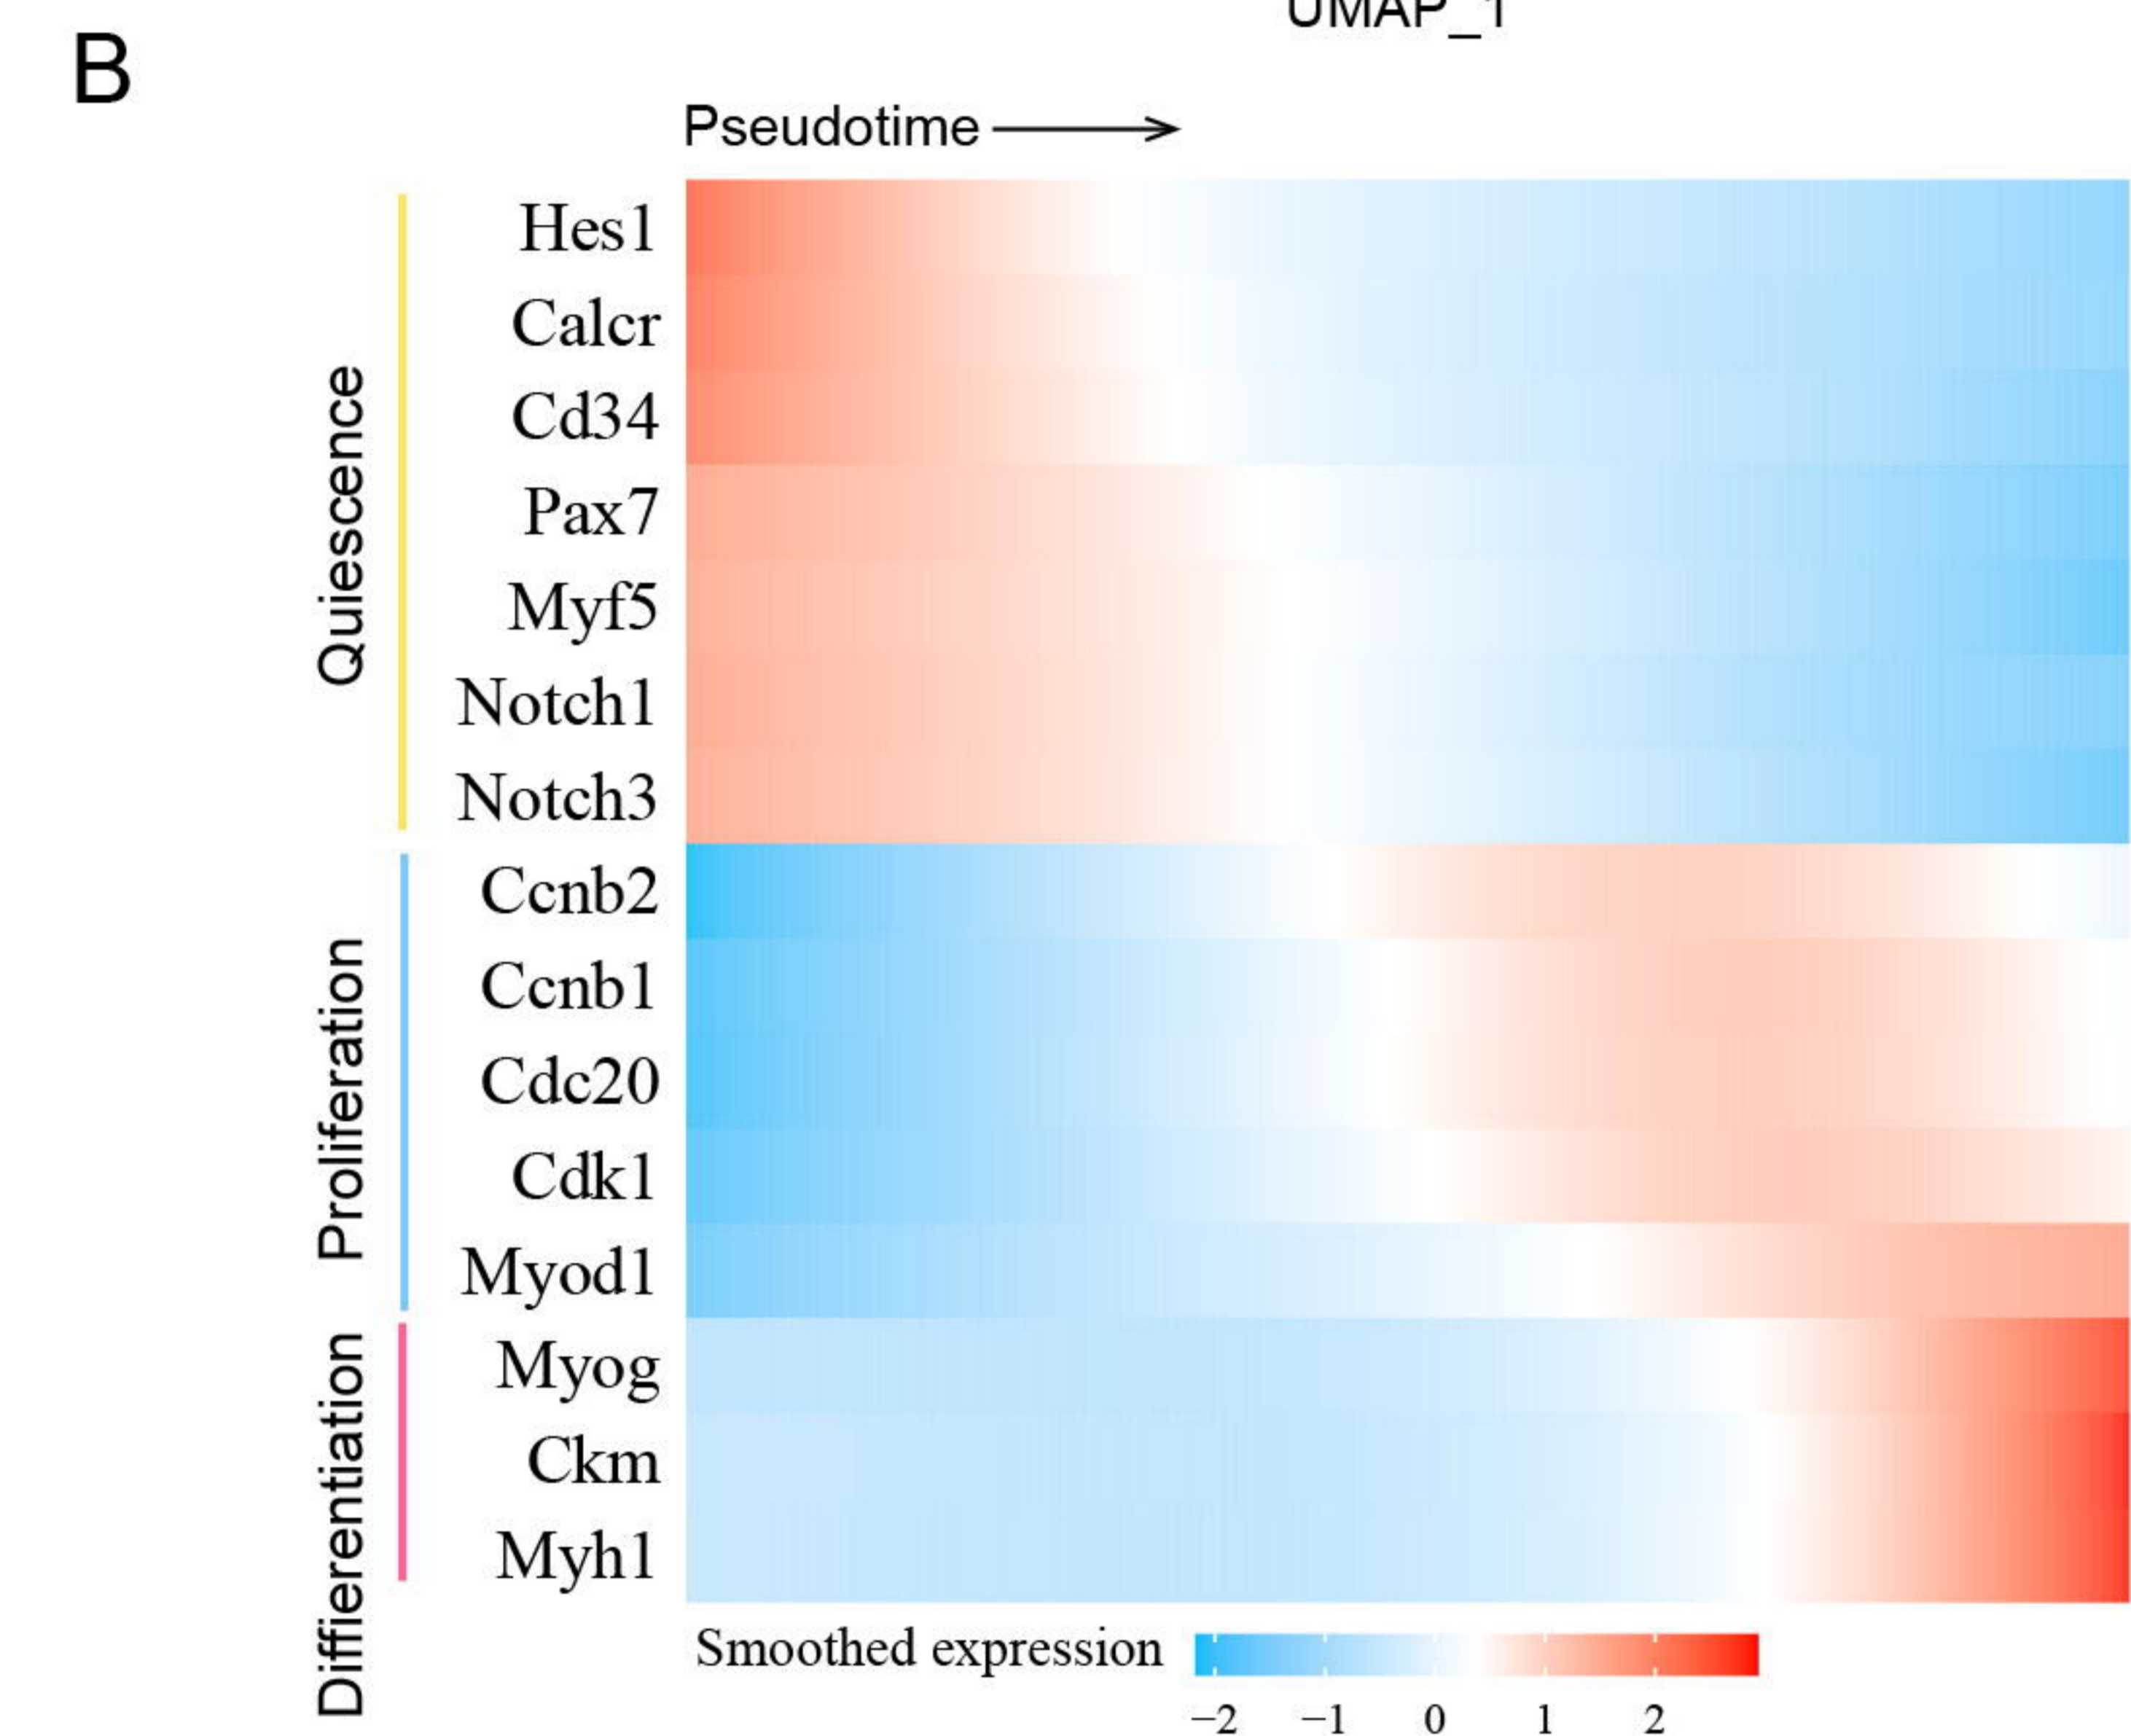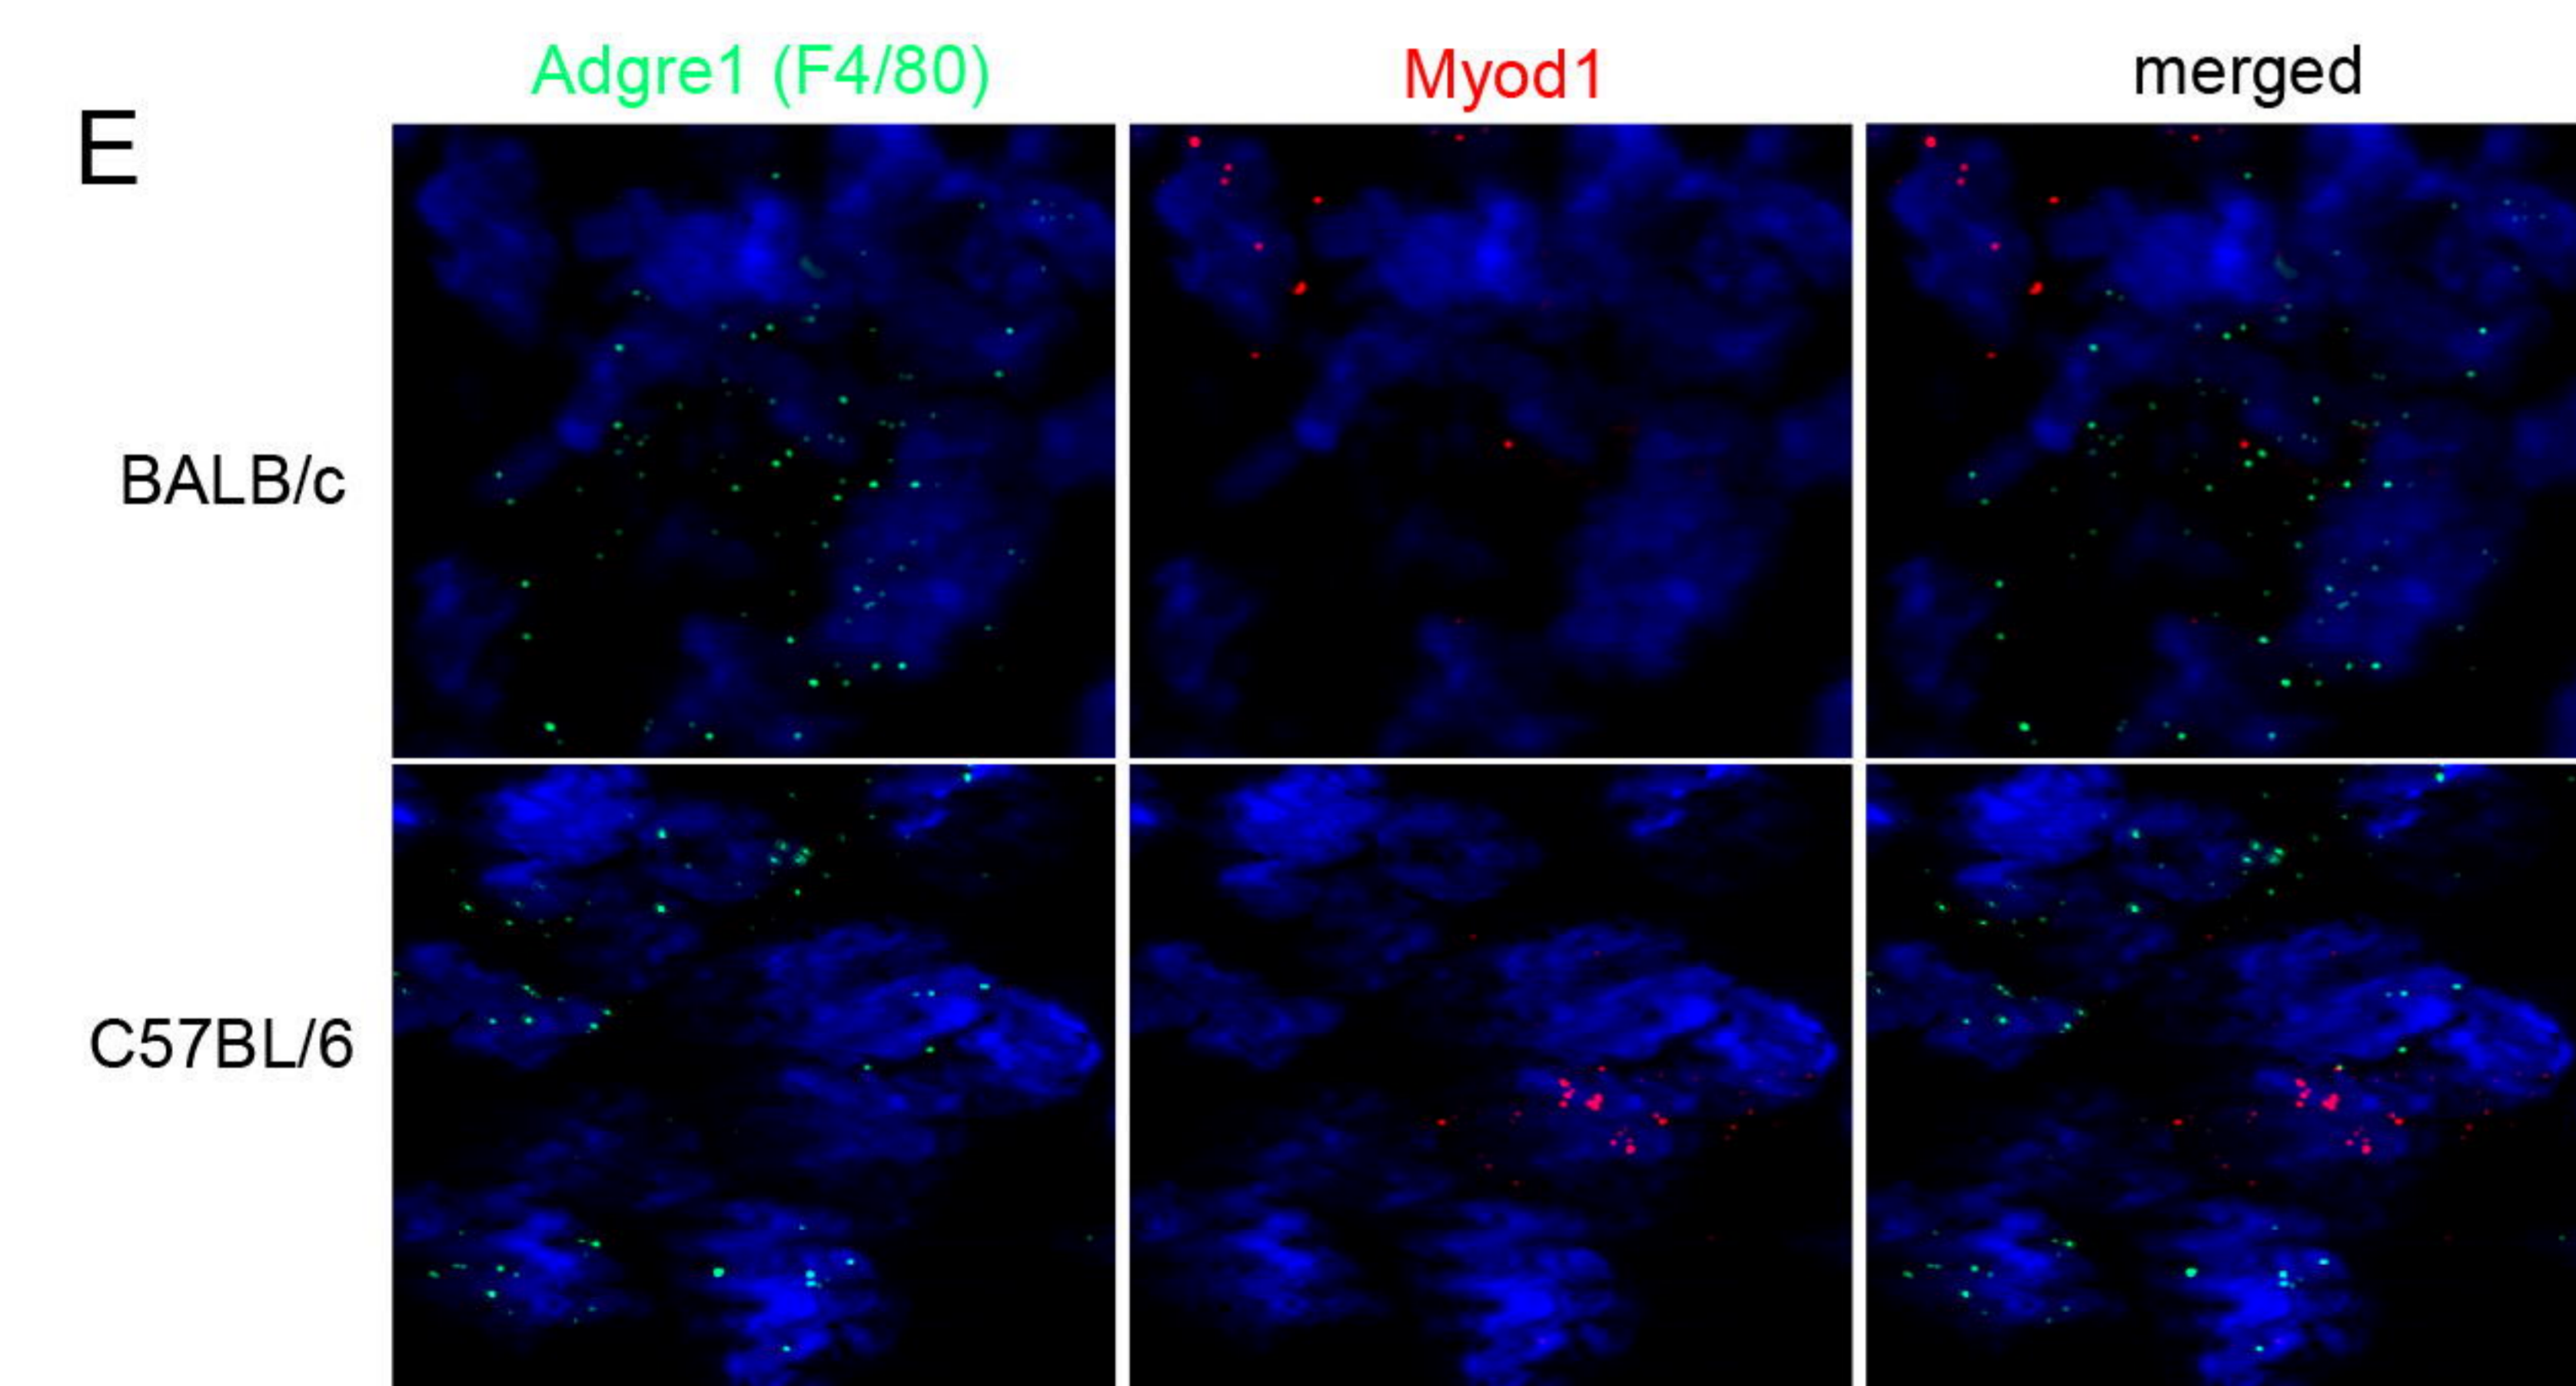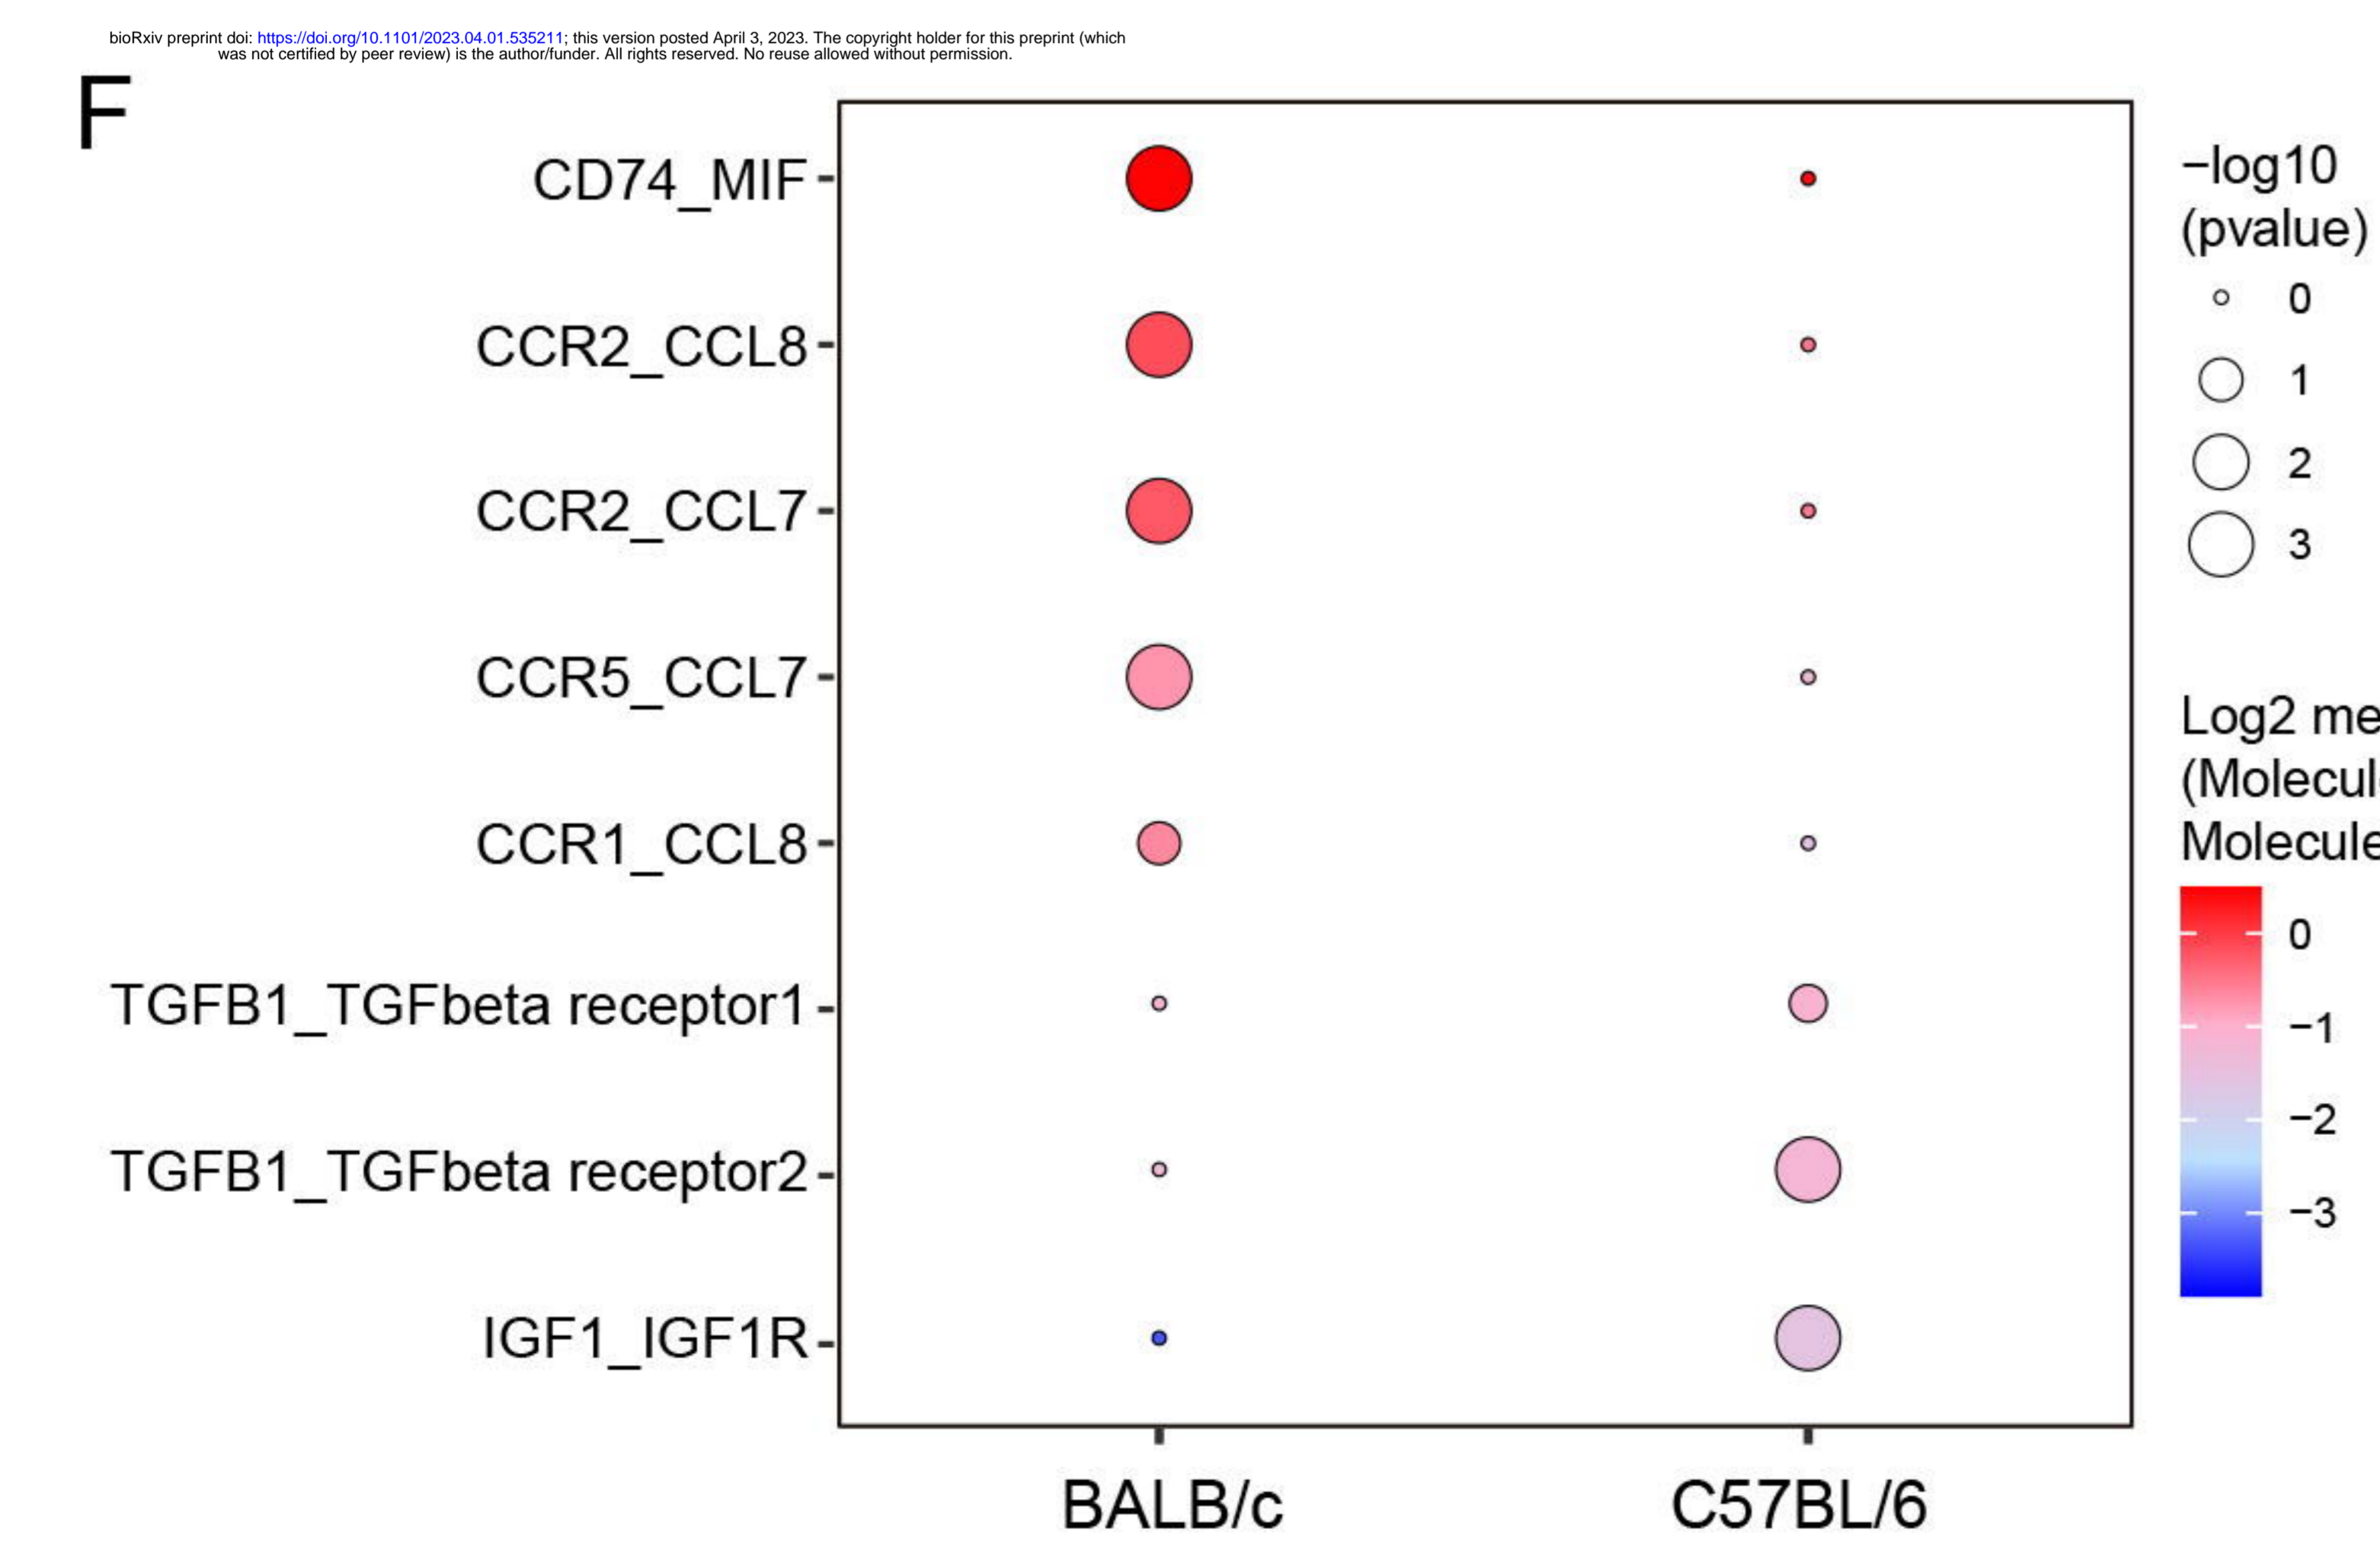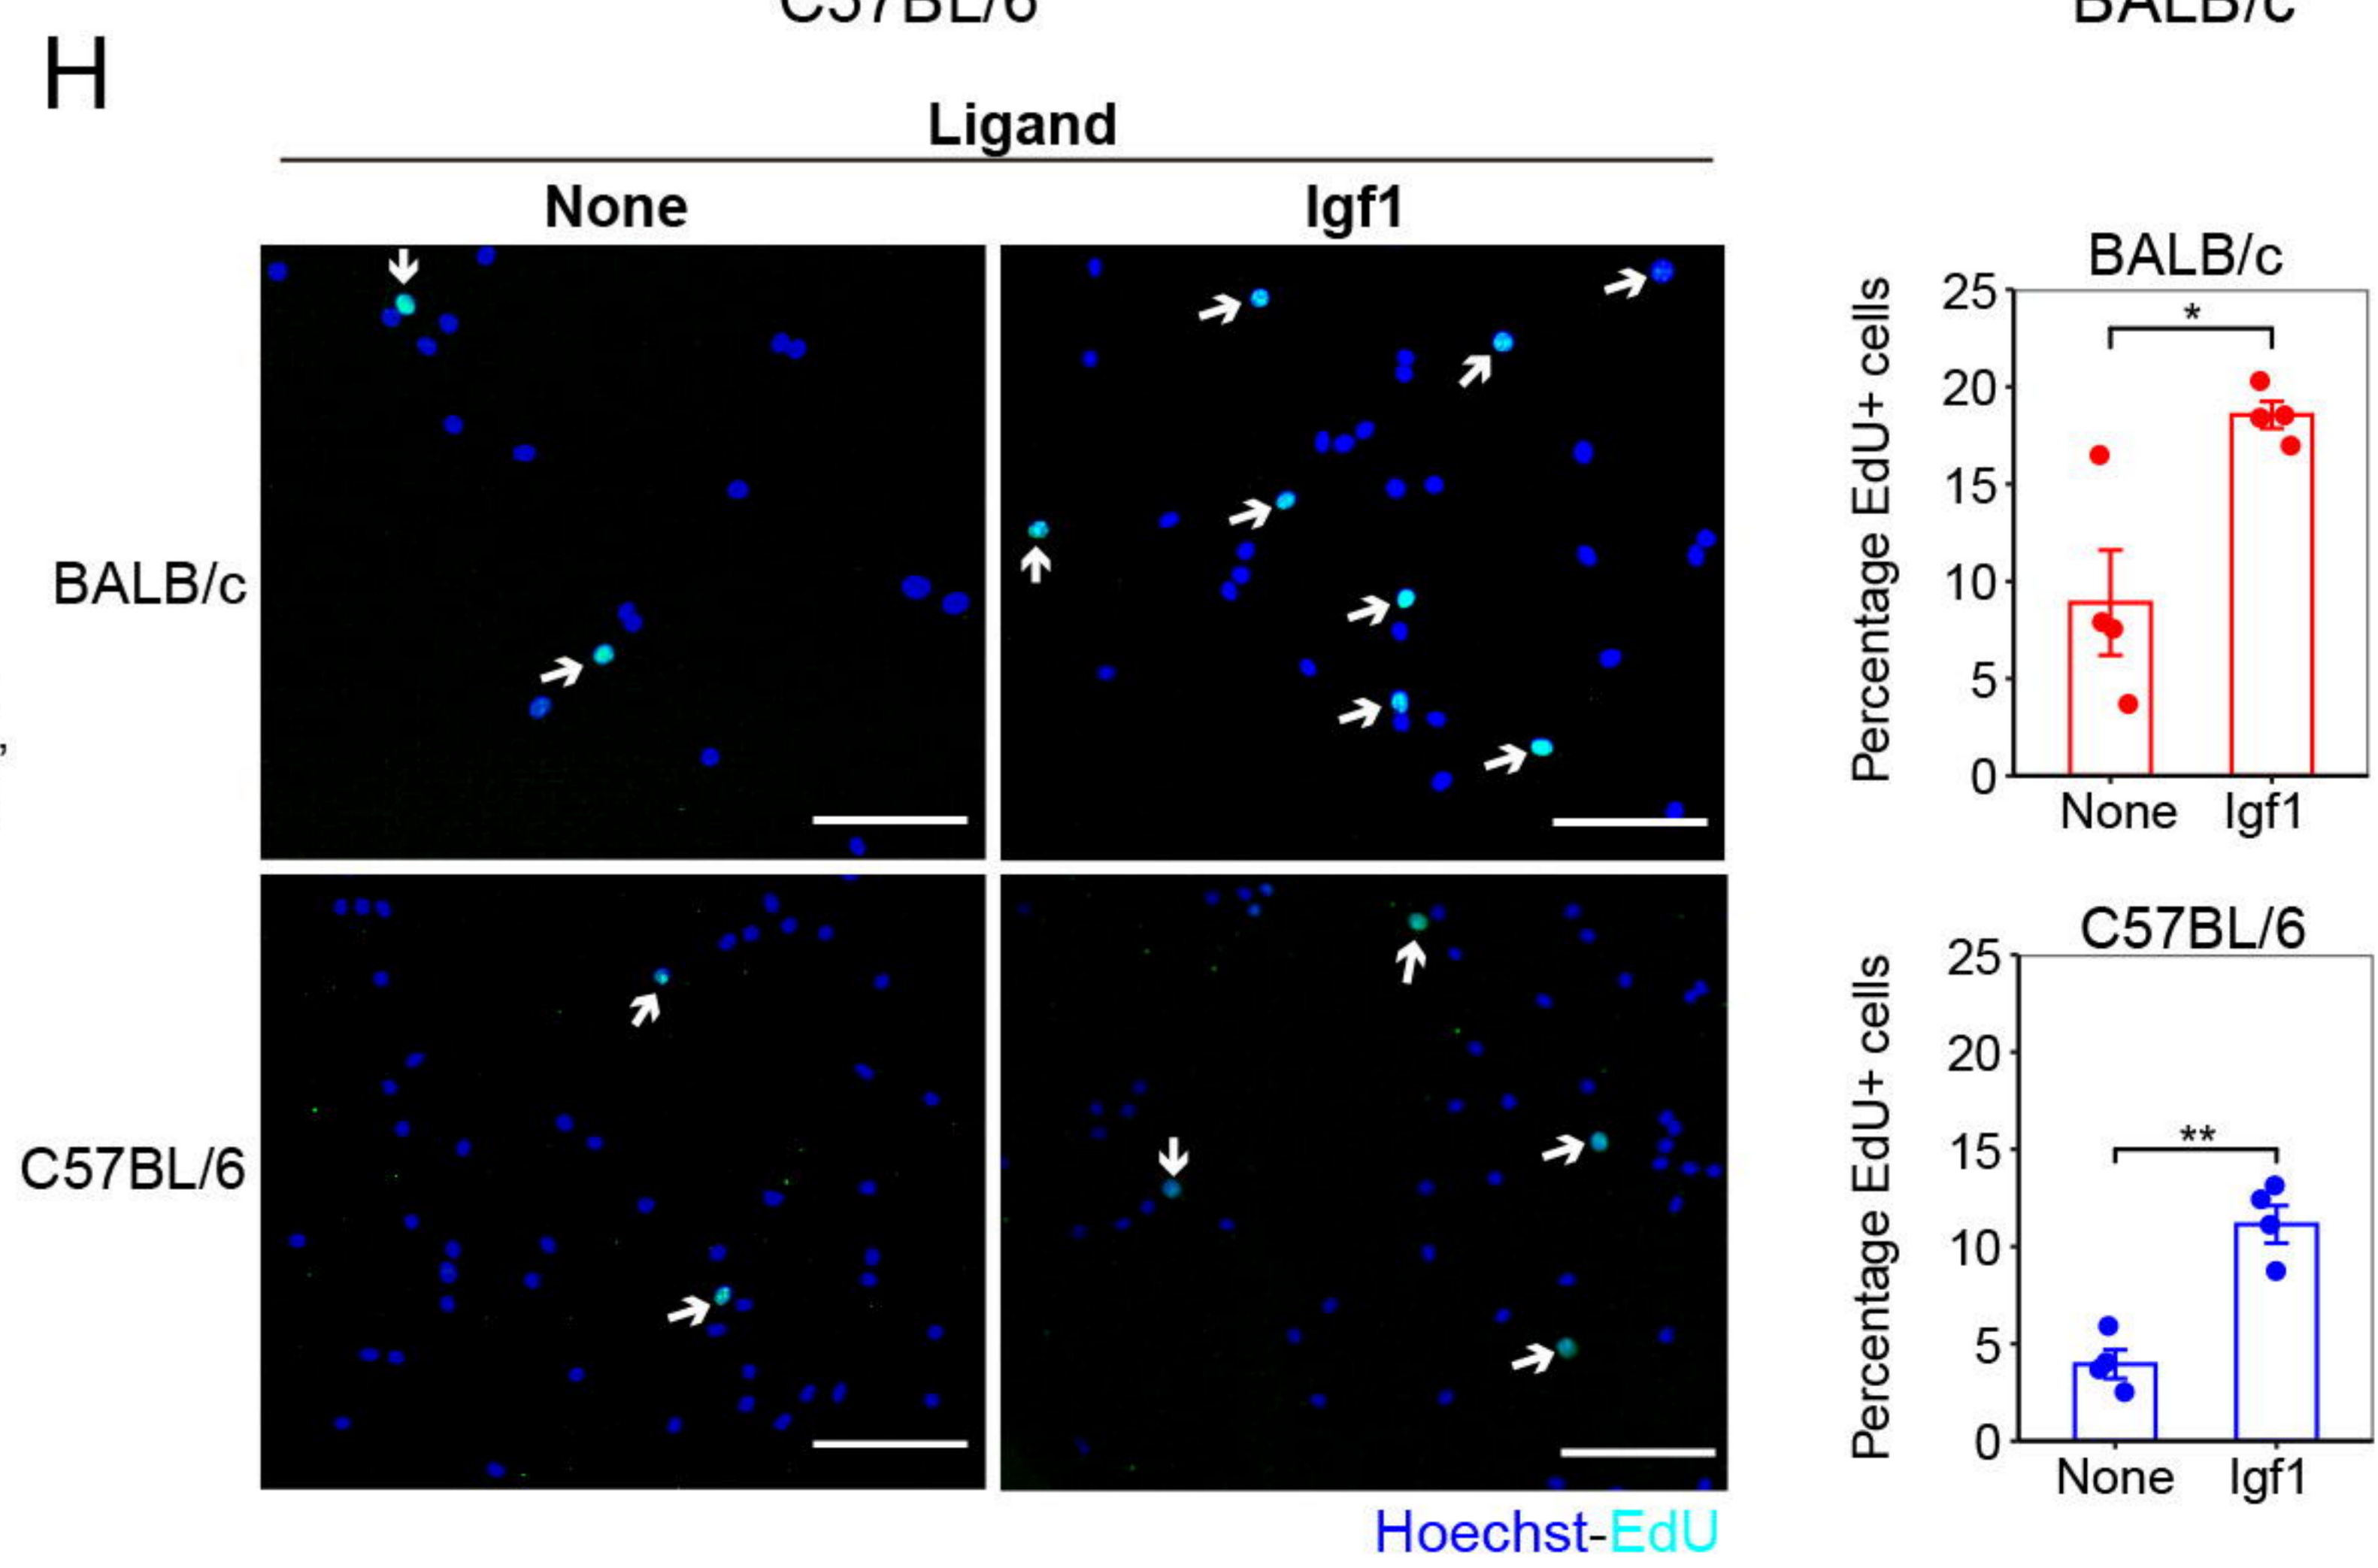

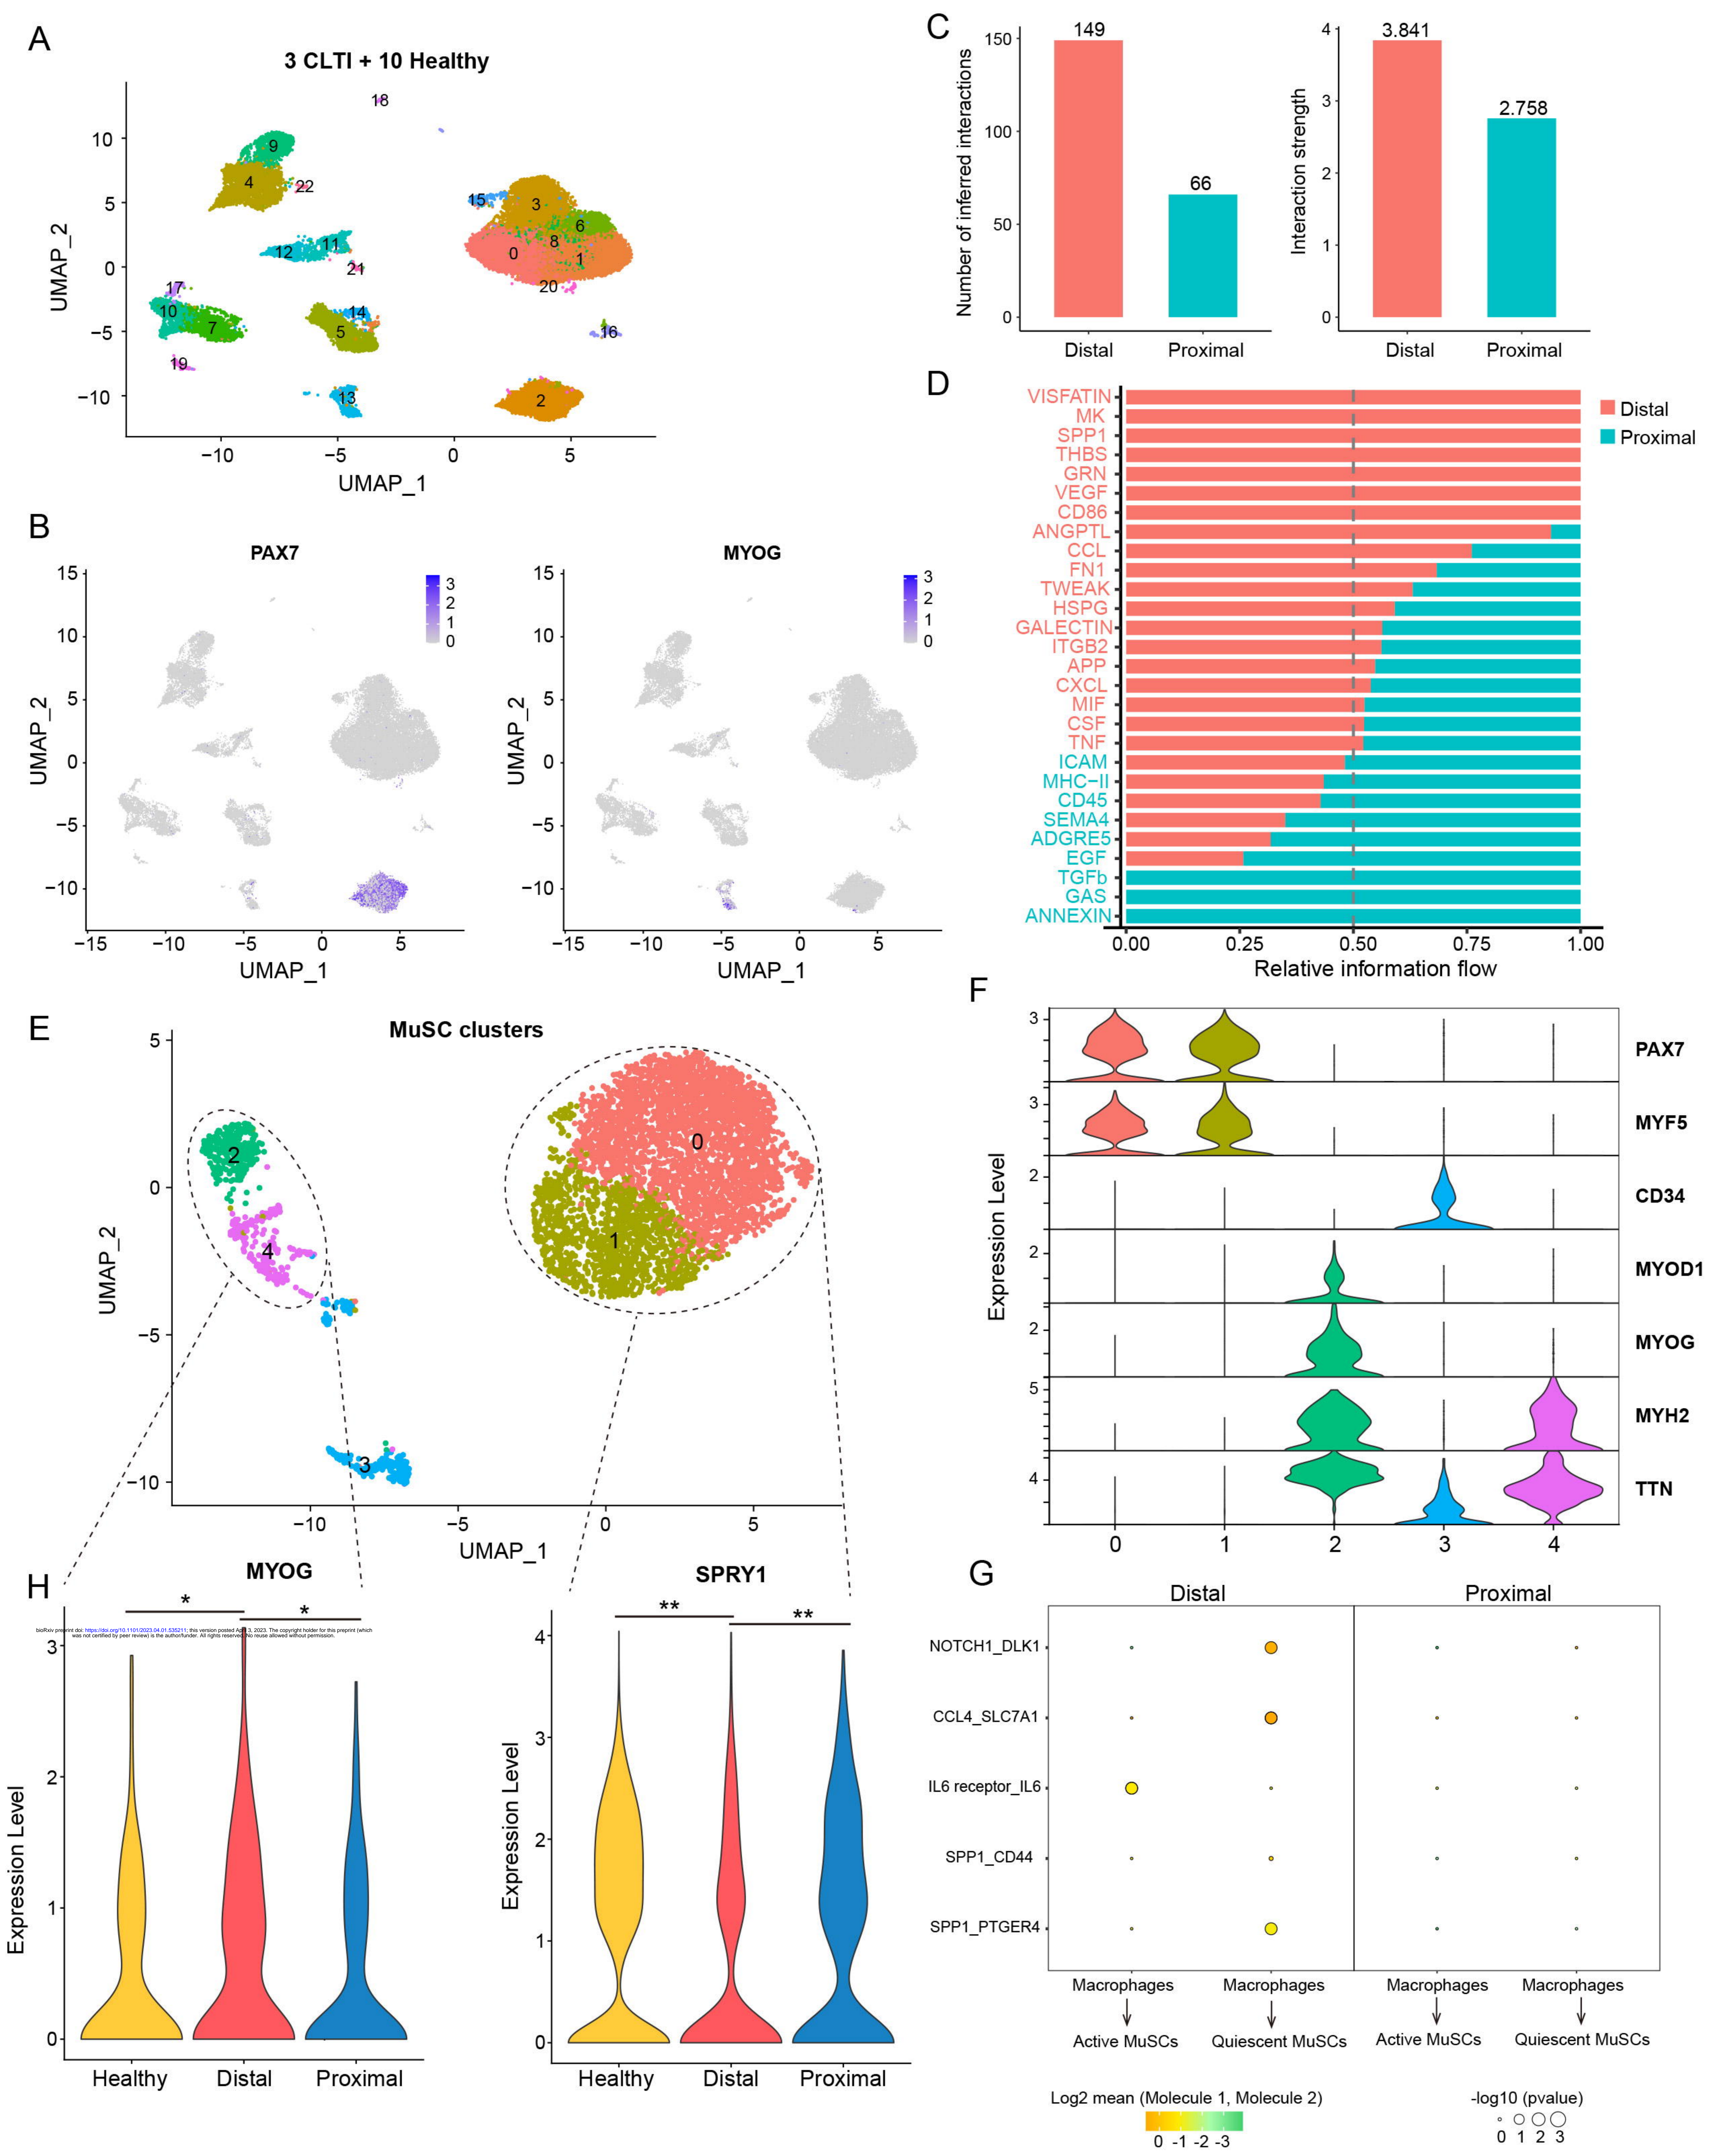

Source: https://www.biorxiv.org/content/10.1101/2023.04.01.535211.full.pdf
